# Supplementary material for: Chromosome instability induced by a single defined sister chromatid fusion
Source: Life Sci Alliance. 2020 Oct 26;3(12):e202000911. doi: 10.26508/lsa.202000911 (PMC7652394; doi:10.26508/lsa.202000911)
Supplement: Supplementary file 2 [file LSA-2020-00911_TableS2.xlsx]

## Sheet: Table S2
Cassette	Donor plasmid	CRISPR/Cas9 donor plasmid	Number of G418-resistant clones	Number of PCR Positive clones	%PCR Positive clones	Positive Clone ID	Copy numbers of the cassette	Name in the paper
Sister	pMTH397	pMTH393	24	2	8.33	15, 21	#15, 2; #21, 2	(FuVis-)XpSIS1-(ID)
Sister	pMTH397	pMTH393	48	9	18.75	3, 6, 9 13, 21, 33, 36, 38, 39	#3, 1; #6, truncated?; #9, 5~6; #13, 3~4; #21, 6~10; #33, 5; #36, 7~8; #38, 8~9; #39, 3	(FuVis-)XpSIS2-(ID)
Control	pMTH729	pMTH393	48	3	6.25	16, 33, 48	#16, 2; #33, 3; #48, 1	(FuVis-)XpCTRL(ID)
Supplementary Table S2. Summary of CRISPR/Cas9-mediated integration of donor sequences into Xp subtelomere. The column marked %PCR positive clones represents percentage of PCR-positive clones per total G418-resistant clones. The column marked copy numbers of the cassette denotes #CloneID and copy number of the cassette, which is assessed by qPCR in Fig S1C-E and S3C.
