# Supplementary material for: Chromosome instability induced by a single defined sister chromatid fusion
Source: Life Sci Alliance. 2020 Oct 26;3(12):e202000911. doi: 10.26508/lsa.202000911 (PMC7652394; doi:10.26508/lsa.202000911)
Supplement: Supplementary file 4 [file LSA-2020-00911_SdataFS3.xlsx]

## Sheet: Legend
Source Data for Figure S3J, K	Summary of sequence junction analysis in Figure S3J, K
Data from columns marked Deletion length were used for Fig S3J.
Data from columns marked microhomology at the junction (bp), short insertion (40>), long insertion (40=<), and complex were used for Fig S3K.

## Sheet: type I
	Cells: XpCTRL48 sgF11
	Primers used: MTH 672 x MTH806
	Longer deletion side		Insertion (if any)			Shorter deletion side
Clone	*Junction sequence	**Deletion length (bp)	Sequence	Insertion length (bp)	***BLAST result	*Junction sequence	**Deletion length (bp)	Microhomology at the junction (bp)	Note	short insertion (40<)	long insertion (40<)	complex
1	GGAGTACTCCgtagccttat	134	AA	2		acgtgtccggCGTTGGAGTG	0			1
2	CACTCCAACGccggacacgt	0				catacatggaTAAGGCTACG	125	0
3	CCGGTCACTCcgtcgaacgc	213	TATCTCAAAAAAAAAAGCTGGGCGCGGTGGCTCACGCCTGTAATCCCAGCACTTTGGGAGGCCAAGGCAGGCGGATCACGAGGTCAGGAGATCGAGACCA	100	Homo sapiens chromosome 3 clone CH17-75H23, complete sequence, repetitive sequence	acgtgtccggCGTTGGAGTG	0		3 mutations at 6, 8, and 9 bp from the left junction.		1
4	CGTTGGCACTacttcacagg	152	C	1		acgtgtccggCGTTGGAGTG	0			1
5	TCGATACACGaagcatcact	183	CGGGGCGCCATCGACCCGGTCCCCAAGGCGCGCGCCGGGGGACGCGGACGCCGGGCCGATCAGCGGCCGGCGGCGGCGCCCCACGAGGCGGTGCCGGGTTCGGTCCCAGGCGGGGCCACCAACGGACGTGAAGCCGGTGAGCCGCTCGGGGGGAAGAAGAGGATCGGCGGGCGGCGGGCGGGGAAGAGGGCACAGACGGGCGAGGGCCGGGGACCGCGAGGGCAAGGGCACCCGGGAGCCCGCAGAGGCGGCGGCTCGGGGAGAAACCTCAGGCACGGCCGGGCCACCAGGAAAACACGGCCGCGGGATCCCACCGCCACAGACACGAGGGCGGTCCCGCGGCGCCCCGCCTGGGACGCCGGACGGCCCTCGGCCCCCACCGAGAACCAGTGGTTATGT…	426	Homo sapiens clone LA13_165F6 sequence, repetitive sequence	tttttgttttAATGTTTTAG	223				1
6	CACCCCAACGccggacacgt	0	TGGGC	5		ttatgttgaaAGGATTGTTT	206		One mutation at 7bp from the left junction		1
7	TTGGCACTACttcacaggag	150				atcaaccgaaCGACTGCCGT	79	0
8	TACCCCGGGTagaaaagcga	311	GCCGCGCGGTGCCGCCGGCGGCGGTGAGGCCCCGCGCGTGTGTCCCGGCTGCGGTCGGCCGCGCTCGCGGGGTCCCCATGGCGTCCCCTTCCCCGCCGGCCGCCTTTCTCGCGCCTTCCCCGTCGCCCCGGCCTCGCCCGTGGTCTCTCGTCTTCTCCCGGCCCGCTCTTCCGAACCGGGTCGGCGCGTCCCCCGGGTGCGCCTCGCTTCCCGGGCCTGCCGCGGCCCTTCCCCGAGGCGTCCGTCCCGGGcgt	254	Human DNA sequence from clone PR11-164K15 on chromosome 22, complete sequence, repetitive sequence	acgtgtccggCGTTGGAGTG	0		Right junction at 3 bp 'upstream' to the target site. Two mutations at 4 and 6 bp from the left junction, and one mutation at 3 bp from the right junction.		1
9	CCGGTCACTCcaacgccgga	5	TGAT	4		gttgaaaggaTTGTTTTTGT	210			1
10	CACTCCAACGccggacacgt	0				agtagtgccaACGTTCGCTC	159	0	One mutation at 7 bp from the right junction.
11	CGAGATCGTTccggtcactc	15				tgtttttgttTTAATGTTTT	221	3
12	CACTCCAACGccggacacgt	0	cACTTATCCTCTAGGTGGGTTGCTAAGTCTGATATCTTCACAAAGGAGGGTGCACTTTTTTGAAATTTTGCTTTAAATGTAATTGCCCTTATATCATCATCAAACAAGCACTCACAGGATGACCAAGGCGTTGTATGCAATTCTAGGTTTTATAGTGTGTAATTGCACTGAACAAAAAGATATTTAAATTCCCA	194	Homo sapiens BAC clone CH17-284L 16 from chromosome 10, complete sequence, repetitive sequenc3	tttttgttttAATGTCTTAG	197		One mutation at 6 bp from the right junction.		1
13	ACGTTGGCACtacttcacag	153	ATTTTATGTTATTTA	15		cggaacgatcTCGCGTAAGG	22			1
14	GATCGATACAcgaagcatca	185	TGCGGGGCGCCATCGACCCGGTCCCCAAGGCGCGCGCCGGGGGACGCGGACGCCGGGCCGATCAGCGGCCGGCGGCGGCGCCCCACGAGGCGGTGCCGGGTTCGGTCCCAGGCGGGGCCACCAACGGACGTGAAGCCGGTGAGCCGCTCGGGGGGAAGAAGAGGATCGGCGGGCGGCGGGCGGGGAAGAGGGCACAGACGGGCGAGGGCCGGGGACCGCGAGGGCAAGGGCACCCGGGAGCCCGCAGAGGCGGCGGCTCGGGGAGAAACCTCAGGCACGGCCGGGCCACCAGGAAAACACGGCCGCGGGATCCCACCGCCACAGACACGAGGGCGGTCCCGCGGCGCCCCGCCTGGGACGCCGGACGGCCCTCGGCCCCCACCGAGAAC	389	Homo sapiens clone LA13_165F6 sequence, repetitive sequence	aacaagacatCAGTGGTTAT	190				1
15	GAATTCACTCcagatcgaat	239				cgtgtccggcGTTGGAGTGA	1	1
16	TGAACGTTGGcactacttca	156				ccggcgttggAGTGACCGGA	6	6
17	TGAACGTTGGcactacttca	156				ccggcgttggAGTGACCGGA	6	6
18	TGAACGTTGGcactacttca	156				ccggcgttggAGTGACCGGA	6	6
19	AATGCACTTCacgacactcc	222	CGGTCACTCTATCTCAAAAAAAAAAGCTGGGCGCGGTGGCTCACGCCTGTAATCCCAGCACTTTGGGAGGCCAAGGCAGGCGGATCACGAGGTCAGGAGATCGAGACCA	109	Homo sapiens chromosome 3 clone CH17-75H23, complete sequence, repetitive sequence	acgtgtccggCGTTGGAGTG	0				1
20	AATGCACTTCacgacactcc	222	CGGTCACTCTATCTCAAAAAAAAAAAGCTGGGCGCGGTGGCTCACGCCTGTAATCCCAGCACTTTGGGAGGCCAAGGCAGGCGGATCACGAGGTCAGGAGATCGAGACCA	110	Homo sapiens chromosome 3 clone CH17-75H23, complete sequence, repetitive sequence	acgtgtccggCGTTGGAGTG	0				1
21	ACACGAAGCtcactagtgg	178				tgctcaagcaCTCCGATATC	62	0
22	TGAACGTTGGcactacttca	156				ccggcgttggAGTGACCGGA	6	6
23	CGTTGGCACTacttcacagg	152	C	1		acgtgtccggCGTTGGAGTG	0			1
24	CACTCCAACGccggacacgt	0				agtgccaacgTTCACTCCAC	162	6
25	AGTGGAGTGAacgttggcac	163				gttggagtgaCCGGAACGAT	11	8
26	CATTACATGGatcgatacac	194	GATTACAGGCGTGAGCCACCGCGCCCGGCCCCTTTATCCTTTTCAGTCCCAGACCTGAACCAGGAGGCAACGGAAGATTTATTACAGATGCTCATTGCTGGGATGCAAGCCTGGTTCAACATAAGCAAATCAATAAACGTAATCCATCAGATAAACAGAAGCTATGACAAAAAACACATGATTATCTCAATAGATGCAGAAAAGGCCTTTGATAAAATTCAACACCCCTTCATGCTAAAAACTCTCAATAAAGGCCTCCCTAGAAGCCAAACAGATGCTGGCACCATGCTTCCTGTAAAGCCTTCAGAACCGTGAGCCAATTAA	324	Homo sapiens 3 BAC RP11-783N9 (Roswell Park Cancer Institute Human BAC Library) complete sequence, repetitive sequence	acgtgtccggCGTTGGAGTG	0				1
27	CATCTGTACCacaggtaagt	317	CCGGGTGCCGCGCGGTGCCGCCGGCGGCGGTGAGGCCCCGCGCGTGTGTCCCGGCTGCGGTCGGCCGCGCTCGCGGGGTCCCCATGGCGTCCCCTTCCCCGCCGGCCGCCTTTCTCGCGCCTTCCCCGTCGCCCCGGCCTCGCCCGTGGTCTCTCGTCTTCTCCCGGCCCGCTCTTCCGAACCGGGTCGGCGCGTCCCCCGGGTGCGCCTCGCTTCCCGGGCCTGCCGCGGCCCTTCCCCGAGGCGTCCGTCCCGGGCGT	260	Human DNA sequence from clone PR11-164K15 on chromosome 22, complete sequence, repetitive sequence	acgtgtccggCGTTGGAGTG	0				1
28	GGTCACTCCAacgccggaca	3				gttcactccaCTAGCTATCA	171	8
29	AGTGGAGTGAacgttggcac	163				gttggagtgaCCGGAACGAT	11	8
30	AGAAAAGCGAtttggattat	291	GAGCAGCGAGAAGCTGCTCTTTGAGCCTGCAGACACCGGAAGCAATGGCAGATTGAAGGGGAAGGAGGGAGACTGAATAGAGCTTCCTTGGTCCAGGAGTTTCTCAACCCACAGGCCATTGAATTGGACTTGCAGACACCACTTTGAACCCTGGAGTCTAACTCATGCTTCATTCACAAACTATGCAATCAAATGACATACTGTGGCCACTCACCCCTGGTTTCGTTTTTAACCCATGCA	240	Homo sapiens serpin familiy E member 2 (SERPINE2), RefSeqGene on chromosome 2.	acgtgtccggCGTTGGAGTG	0				1
31	CACTCCAACGccggacacgt	0	TTGGCACTACTTCACAGGAGTACTCCGTAGCCTTATCCATGTATGACACTCCTGTAATACGTTATTCTACCACGGCAGTCGTTCGGTTGATATCGGAGTGCTTGAGCACATACGCGAATTGGAGTATCCCTTACGCGAGATCG	143	No significant similarity found.	ccttggccaacTTTGGTCACT	307				1
32	TCGATACACGaagcatcact	183	CGGGGCGCCATCGACCCGGTCCCCAAGGCGCGCGCCGGGGGACGCGGACGCCGGGCCGATCAGCGGCCGGCGGCGGCGCCCCACGAGGCGGTGCCGGGTTCGGTCCCAGGCGGGGCCACCAACGGACGTGAAGCCGGTGAGCCGCTCGGGGGGAAGAAGAGGATCGGCGGGCGGCGGGCGGGGAAGAGGGCACAGACGGGCGAGGGCCGGGGACCGCGAGGGCAAGGGCACCCGGGAGCCCGCAGAGGCGGCGGCTCGGGGAGAAACCTCAGGCACGGCCGGGCCACCAGGAAAACACGGCCGCGGGATCCCACCGCCACAGACACGAGGGCGGTCCCGCGGCGCCCCGCCTGGGACGCCGGACGGCCCTCGGCCCCCACCGAGAAC	387	Homo sapiens clone LA13_165F6 sequence, repetitive sequence	aacaagacatCAGTGGTTAT	190				1
33	AGTGGAGTGAacgttggcac	163				gttggagtgaCCGGAACGAT	11	8
34	GAGATCGTTCcggtcactcc	14	T	1		atcttgtttaGTGCACTAAC	247			1
35	CCGGTCACTCcaacgccgga	5	TGAT	4		gttgaaaggaTTGTTTTTGT	210			1
36	TGAACGTTGGcactacttca	156				ccggcgttggAGTGACCGGA	6	6
37	CATCTGTACCacaggtaagt	317	CCGGGTGCCGCGCGGTGCCGCCGGCGGCGGTGAGGCCCCGCGCGTGTGTCCCGGCTGCGGTCGGCCGCGCTCGCGGGGTCCCCATGGCGTCCCCTTCCCCGCCGGCCGCCTTTCTCGCGCCTTCCCCGTCGCCCCGGCCTCGCCCGTGGTCTCTCGTCTTCTCCCGGCCCGCTCTTCCGAACCGGGTCGGCGCGTCCCCCGGGTGCGCCTCGCTTCCCGGGCCTGCCGCGGCCCTTCCCCGAGGCGTCCGTCCCGGGCGT	260	Human DNA sequence from clone PR11-164K15 on chromosome 22, complete sequence, repetitive sequence	acgtgtccggCGTTGGAGTG	0				1
38	AACTGGACGGtgacgtgaat	405	GATGCTGAGACTGGCTGGCCCATATTTGTGGTACCATAGACAGGACAGGCGGAGGCTAAGTGGCCCCAGCCTGAGTCATGTGGCTGAGCCTCATGGAGCTGGAGGGCTGACCTGCTGAGCCCTGCCCTCTACAGAGGCACAACAGAGACGTTTTAAAATTTTTATTTAGGAGGGATTCCTACATAACTAGATTAGCAGTGAGAGTAGTGGTCTCAGAAATCACGCGTGGATTTAGGATTCAGGATGGCTATATTAATTCAGAAGTAAAAATACACATATGACAGAGACAAGAGTTTCATGAGTCAGAAAAAGAAAATTCCAGGTAAGCCTGGCTTTATAGCTGTCTAAGTGGTGTGATTTGAGGTGAGTCAACACTACTGTTGAAAATACCTTATGTAG…	423	Homo sapiens BAC clone PR11-570L 15 from 2, complete sequence, repetitive sequence	acgtgtccggCGTTGGAGTG	0				1
39	GCATCACTAGtggagtgaac	171	CACAACG	7		acgtgtccggCGTTGGAGTG	0			1
	*Upper letters: remaining junction sequence. Lower letters: deleted sequences. Underlined sequences: microhomology at the junction.
	**Deletion length: counted from DSB site induced by Cas9-sgFusion11.
	***The top hit (nucleotide collection (nr/nt) optimized for highly similar sequences) is shown. Repetitive sequence means multiple sequences from different chromosomes are aligned (even partially) with more than 95% identity.

## Sheet: type II
		Cells: XpCTRL48 sgF11
		Primers used: MTH 672 x MTH806
		mCitrine N-ter side		Insertion (if any)			mCitrine C-ter side
Clone	****L/R	*Junction sequence	**Deletion length (bp)	Sequence	Insertion length (bp)	***BLAST result	*Junction sequence	**Deletion length (bp)	Microhomology at the junction (bp)	Note	short insertion (40<)	long insertion (40<)	complex
1	L	CACTCCGTCGaacgcattac	208	TT	2		cactccaacgCCGGACACGT	0			1
1	R	ACTCTACCTCttcttcttct	1254				gggatactccAATTCGCGTA	40	1
2	L	CCGGTCACTCcgtcgaacgc	5	TTCTTCTTCTTCTTCTTCTTCTTGCAGGGGCAACAAACTTCTCTCTGCTGAAATAGAGA	59	No sequence similarily found.	ccttgcaggcAAACTTCCAG	1026		Inserted sequences are mostly derived from the original cassette sequence but includes some mutations.			1
2	R	ACGTGTCCGGcgttggagtg	0				ccttgcaggcAAACTTCCAGT	285	0
3	L	CCGGTCACTCcaacgccgga	5	TTCTTCTTCTTCTTCTTCTTCTTGCAGGGGCAACAAACTTCTCTCTGCTGAAATAGAGA	59	No sequence similarily found.	ccttgcaggcAAACTTCCAGT	1026		Inserted sequences are mostly derived from the original cassette sequence but includes some mutations.			1
3	R	ACGTGTCCGGcgttggagtg	0				ccttgcaggcAAACTTCCAGT	285	0
4	L	GAGAAAAGCGatttggatta	292				ggaacccgcgCTATGACGGC	1017	3
4	R	AACGTGTCCGgcgttggagt	1				gtgtccggcgTTGGAGTGAC	2	2
5	L	GACACTCCGTcgaacgcatt	210				tgccttccttGACCCTGGAA	1136	1
5	R									No modification, omitted from analysis
6	L									No modification, omitted from analysis
6	R	GGACACGTTCgctacggatc	1318				gccaacgttcACTCCACTAG	165	6
7	L	CACTCCAACGccggacacgt	0	TT			cactccaacgCCGGACACGT	0			1
7	R	GAATCTTGTTTAGTGCACTgactctacct	1265				gaatcttgtttagtgcactAACTCTACTT	254	19		1
8	L	CACTCCAACGccggacacgt	0	TAATAGGTTTGTGTTATGGGCTGAATTTTGTCCTCCTAAAATTCATATATTGAAATCCTAAACCCCCAAAACCTCA	76	Homo sapiens chromosome 18, clone PR11-326M20, complete sequence	cactccaacgCCGGACACGT	0				1
8	R	GAATCTTGTTTAGTGCACTgactctacct	1265				gaatcttgtttagtgcactAACTCTACTT	254	19
9	L	TCACTCCAGAtcgaatgcac	235				aaaagacagaATAAAACGCA	1041	4
9	R	TAGCGAACGTgtccggcgtt	6				tgtccggcgtTGGAGTGACC	3	3
10	L	TGAACGTTCTttttcgcaac	522				cgcaggttctCCGGCCGCTT	3	5
10	R	GCTTTACGGTatcgccgctc	442				tgtccggcgtTGGAGTGACC	3	2
11	L	CACTCCAACGccggacacgt	0				tccaacgccgGACACGTTCG	3	2
11	R	ACTGACTCTACctcttcttct	1257				ctaactctacTTCTTCTTCT	262	7
12	L	TGAACGTTCTttttcgcaac	522				aggatgatctGGACGAAGAG	626	3
12	R	ATAGCAGGCAtgctggggat	50	cgGTTGGAGTGACCGGA	17		ggctacggagTACTCCTGTG	138		Insert sequence is the original cassette sequence			1
13	L	TCCAGATCGAatgcacttca	231				gattcatcgaCTGTGGCCGG	776	5
13	R	TTTCCTAATAaaatgaggaa	181				agggatactcCAATTCGCGT	13	0
14	L	GCATCACTAGtggagtgaac	171				tgatccgtagCGAACGTGTC	1317	3
14	R									No modification, omitted from analysis
15	L	CACTCCAACGccggacacgt	0				tccaacgccgGACACGTTCG	3	2
15	R	ACTGACTCTACctcttcttct	1257				ctaactctacTTCTTCTTCT	262	7
16	L	CACTCCAACGccggacacgt	0				tccaacgccgGACACGTTCG	3	2
16	R	ACTGACTCTACctcttcttct	1257				ctaactctacTTCTTCTTCT	262	7
17	L	TCCAGATCGAatgcacttca	231				gattcatcgaCTGTGGCCGG	776	5
17	R	TTTCCTAATAaatgaggaaa	155				agggatactcCAATTCGCGT	39	0
18	L	CACTCCAACGccggacacgt	0				tccaacgccgGACACGTTCG	3	2
18	R	ACTGGGCACAacagacaatc	1100	T	1		gttttagttgAATCTTGTTT	236			1
19	L	CACTCCAACGccggacacgt	0				tccaacgccgGACACGTTCG	3	2
19	R	ACTGACTCTACctcttcttct	1257				ctaactctacTTCTTCTTCT	262	7
20	L	CGGCGTAGTCcccattctcg	428	GAGCGC	6		tcgccttcttGACGAGTTCT	933			1
20	R	ACGTGTCCGGcgttggagtg	0	AA	2		acgtgtccggCGTTGGAGTG	0			1
21	L	CCGGTCACTCcaacgccgga	5	TTCTTCTTCTTCTTCTTCTTCTTGCAGGGGCAACAAACTTCTCTCTGCTGAAATAGAGA	59	No sequence similarily found.	ccttgcaggcAAACTTCCAGT	1026		Inserted sequences are mostly derived from the original cassette sequence but includes some mutations.			1
21	R	ACGTGTCCGGcgttggagtg	0				ccttgcaggcAAACTTCCAGT	285	0
22	L	CACTCCAACGccggacacgt	0				tccaacgccgGACACGTTCG	3	2
22	R	ACTGGGCACAacagacaatc	1100	T	1		gttttagttgAATCTTGTTT	236			1
23	L	CACTCCAACGccggacacgt	0				tccaacgccgGACACGTTCG	3	2
23	R	ACTGACTCTACctcttcttct	1257				ctaactctacTTCTTCTTCT	262	7
24	L	TCACTCCAACgccggacacg	1				actccaacgcCGGACACGTT		1
24	R	TTCTTGCAGGggcaacaaac	1235				ttccttgcaggCAAACTTCCA	284	8
25	L	GCATCACTAGtggagtgaac	171				tgatccgtagCGAACGTGTC	1317	3
25	R									No modification, omitted from analysis
26	L	CTCCAGATCGaatgcacttc	232	CACGGTGTAGGTGTCATTCTATTCTGGGGGGTGGGGCAGGACAGCAAGGGGGAGGATTGGGAAGACAATAGCAGGCATGCTGGGGATGCGGTGGACTCTAT	101	Synthetic construct clone BAC16 JSC-1, complete sequence.	taaaacgcacGGTGTTGGCT	1052				1
26	R	AGTAGGTGTCattctattct	117				accgaacgacTGCCGTGGTA	83	1
27	L	CACTCCAACGccggacacgt	0				tccaacgccgGACACGTTCG	3	2
27	R	ACTGACTCTACctcttcttct	1257				ctaactctacTTCTTCTTCT	262	7
28	L	CACTCCAACGccggacacgt	0				tccaacgccgGACACGTTCG	3	2
28	R	ACTGACTCTACctcttcttct	1257				ctaactctacTTCTTCTTCT	262	7
29	L	CACTCCAACGccggacacgt	0				tccaacgccgGACACGTTCG	3	2
29	R	ACTGACTCTACctcttcttct	1257				ctaactctacTTCTTCTTCT	262	7
30	L	GCATCACTAGtggagtgaac	171				tgatccgtagCGAACGTGTC	1317	3
30	R									No modification, omitted from analysis
31	L	CACTCCGTCGaacgcattac	208	TT	2		tcactccacgCCGGACACGT	0			1
31	R	ACTCTACCTCttcttcttct	1254				gggatactccAATTCGCGTA	40	1
32	L	CACTCCAACGccggacacgt	0				tccaacgccgGACACGTTCG	3	2
32	R	ACTGACTCTACctcttcttct	1257				ctaactctacTTCTTCTTCT	262	7
		*Upper letters: remaining junction sequence. Lower letters: deleted sequences. Underlined sequences: microhomology at the junction.
		**Deletion length: counted from DSB site induced by Cas9-sgFusion11.
		***The top hit (nucleotide collection (nr/nt) optimized for highly similar sequences) is shown. Repetitive sequence means multiple sequences from different chromosomes are aligned (even partially) with more than 95% identity.
		****L: sgFUSION11 target site proximal to mCitrine N-terminus. R: sgFUSION11 target site proximal to mCitrine C-terminus
