# Supplementary material for: Chromosome instability induced by a single defined sister chromatid fusion
Source: Life Sci Alliance. 2020 Oct 26;3(12):e202000911. doi: 10.26508/lsa.202000911 (PMC7652394; doi:10.26508/lsa.202000911)
Supplement: Supplementary file 5 [file LSA-2020-00911_SdataF3.xlsx]

## Sheet: README
Source Data for Figure 3, S5, and S6	Score of FISH analysis in Figure 3, S5, and S6
Cell	mock, untreated; mCit, retrovirus-delivered full-length mCitrine; sgF11, lentivirus-derivered CRISPR/Cas9-sgFUSION11; D10, sorted at 10 days post infection; D10-17, sorted at D10 and recultured for 7 days before harvesting.
Exp	Serial number of independent experiment.
#Chromosome	Number of total chromosomes per metaphase spread
#Cen-positive Xchr	Number of centromere-positive X chromosome
Translocation	Number of centromere-positive X chromosome harboring translocation (blank = 0)
X-X fusion	Number of centromere-positive X chromosome involved in end-to-end chromosome fusion between X chromosomes (blank = 0) (2 represents a single X-X fusion)
X-nonX fusion	Number of centromere-positive X chromosome involved in end-to-end chromosome fusion between X chromosome and non-X chromosome (blank = 0)
ring fusion	Number of centromere-positive X chromosome involved in intra-chromosome fusion (blank = 0)
acen-fragment	Metaphase spread that possess a single chank of extra-acentric X chromosome (1, yes; blank, no)
acen-scattering	Metaphase spread that possess more than two fragments of extra-acentric X chromosome (1, yes; blank, no)
acen-ring	Metaphase spread that possess ring-shpaped extra-acentric X chromosomes (1, yes; blank, no)
acen-ex-translocation	Metaphase spread that possess extra-acentric X chromosome on non-X chromosome end (1, yes; blank, no)

## Sheet: Source Data for Fig 3, S5, S6
Cell	Exp	#Chromosome	#Cen-positive Xchr	Translocation	X-X fusion	X-nonX fusion	ring fusion	acen-fragment	acen-scattering	acen-ring	acen-ex-translocation
CTRL48 mock	1	44	1
CTRL48 mock	1	45	1
CTRL48 mock	1	45	1
CTRL48 mock	1	46	1
CTRL48 mock	1	44	1
CTRL48 mock	1	44	1
CTRL48 mock	1	43	1
CTRL48 mock	1	44	1
CTRL48 mock	1	45	1
CTRL48 mock	1	44	1
CTRL48 mock	1	45	1
CTRL48 mock	1	44	1
CTRL48 mock	1	45	1
CTRL48 mock	1	44	1
CTRL48 mock	1	45	1
CTRL48 mock	1	45	1
CTRL48 mock	1	45	1
CTRL48 mock	1	45	1
CTRL48 mock	1	45	1
CTRL48 mock	1	45	1
CTRL48 mock	1	32	1
CTRL48 mock	1	44	1
CTRL48 mock	1	45	1
CTRL48 mock	1	45	1
CTRL48 mock	1	44	1
CTRL48 mock	1	43	1
CTRL48 mock	1	45	1
CTRL48 mock	1	38	1
CTRL48 mock	1	45	1
CTRL48 mock	1	45	1
CTRL48 mock	2	46	1
CTRL48 mock	2	44	1
CTRL48 mock	2	44	1
CTRL48 mock	2	40	1
CTRL48 mock	2	36	1
CTRL48 mock	2	43	1
CTRL48 mock	2	39	1
CTRL48 mock	2	43	1
CTRL48 mock	2	43	1
CTRL48 mock	2	43	1
CTRL48 mock	2	44	1
CTRL48 mock	2	45	1
CTRL48 mock	2	43	1
CTRL48 mock	2	43	1
CTRL48 mock	2	45	1
CTRL48 mock	2	40	1
CTRL48 mock	2	44	1
CTRL48 mock	2	43	1
CTRL48 mock	2	44	1
CTRL48 mock	2	43	1
CTRL48 mock	2	42	1
CTRL48 mock	2	31	1	1
CTRL48 mock	2	44	1
CTRL48 mock	2	39	1
CTRL48 mock	2	45	1
CTRL48 mock	2	45	1
CTRL48 mock	2	44	1
CTRL48 mock	2	39	1
CTRL48 mock	2	43	1
CTRL48 mock	2	45	1	1
CTRL48 mock	3	44	1
CTRL48 mock	3	43	1
CTRL48 mock	3	44	1
CTRL48 mock	3	45	1
CTRL48 mock	3	45	1
CTRL48 mock	3	45	1
CTRL48 mock	3	45	1
CTRL48 mock	3	45	1
CTRL48 mock	3	43	1
CTRL48 mock	3	44	1
CTRL48 mock	3	46	1
CTRL48 mock	3	44	1
CTRL48 mock	3	44	1
CTRL48 mock	3	44	1
CTRL48 mock	3	45	1
CTRL48 mock	3	45	1
CTRL48 mock	3	44	1
CTRL48 mock	3	45	1
CTRL48 mock	3	46	1
CTRL48 mock	3	45	1
CTRL48 mock	3	44	1
CTRL48 mock	3	45	1
CTRL48 mock	3	45	1
CTRL48 mock	3	44	1
CTRL48 mock	3	44	1
CTRL48 mock	3	44	1
CTRL48 mock	3	44	1
CTRL48 mock	3	45	1
CTRL48 mock	3	43	1
CTRL48 mock	3	46	1
CTRL48 sgF11 D10	1	45	1
CTRL48 sgF11 D10	1	46	1
CTRL48 sgF11 D10	1	45	1
CTRL48 sgF11 D10	1	45	1
CTRL48 sgF11 D10	1	45	1
CTRL48 sgF11 D10	1	45	1
CTRL48 sgF11 D10	1	83	2
CTRL48 sgF11 D10	1	44	1
CTRL48 sgF11 D10	1	46	1
CTRL48 sgF11 D10	1	46	1
CTRL48 sgF11 D10	1	39	1
CTRL48 sgF11 D10	1	44	1
CTRL48 sgF11 D10	1	85	3
CTRL48 sgF11 D10	1	46	1
CTRL48 sgF11 D10	1	34	1
CTRL48 sgF11 D10	1	44	1
CTRL48 sgF11 D10	1	46	1
CTRL48 sgF11 D10	1	70	1
CTRL48 sgF11 D10	1	44	1
CTRL48 sgF11 D10	1	34	1
CTRL48 sgF11 D10	1	39	1
CTRL48 sgF11 D10	1	42	1
CTRL48 sgF11 D10	1	43	1
CTRL48 sgF11 D10	1	41	1
CTRL48 sgF11 D10	1	42	1
CTRL48 sgF11 D10	1	44	1
CTRL48 sgF11 D10	1	45	1
CTRL48 sgF11 D10	1	44	1
CTRL48 sgF11 D10	1	45	1
CTRL48 sgF11 D10	1	39	1
CTRL48 sgF11 D10	2	45	1
CTRL48 sgF11 D10	2	45	1
CTRL48 sgF11 D10	2	44	1
CTRL48 sgF11 D10	2	45	1
CTRL48 sgF11 D10	2	45	1
CTRL48 sgF11 D10	2	44	1
CTRL48 sgF11 D10	2	46	1
CTRL48 sgF11 D10	2	46	1
CTRL48 sgF11 D10	2	46	1
CTRL48 sgF11 D10	2	44	1
CTRL48 sgF11 D10	2	45	1
CTRL48 sgF11 D10	2	45	1
CTRL48 sgF11 D10	2	44	1
CTRL48 sgF11 D10	2	43	1
CTRL48 sgF11 D10	2	45	1
CTRL48 sgF11 D10	2	44	1
CTRL48 sgF11 D10	2	44	1
CTRL48 sgF11 D10	2	45	1
CTRL48 sgF11 D10	2	33	0
CTRL48 sgF11 D10	2	42	1
CTRL48 sgF11 D10	2	39	1
CTRL48 sgF11 D10	2	45	1
CTRL48 sgF11 D10	2	45	1
CTRL48 sgF11 D10	2	45	1
CTRL48 sgF11 D10	2	82	2		2
CTRL48 sgF11 D10	2	45	1
CTRL48 sgF11 D10	2	45	1
CTRL48 sgF11 D10	2	44	1	1
CTRL48 sgF11 D10	2	44	1	1
CTRL48 sgF11 D10	2	45	1
CTRL48 sgF11 D10	3	33	1
CTRL48 sgF11 D10	3	41	1
CTRL48 sgF11 D10	3	45	1
CTRL48 sgF11 D10	3	45	1
CTRL48 sgF11 D10	3	44	1
CTRL48 sgF11 D10	3	42	1
CTRL48 sgF11 D10	3	44	1
CTRL48 sgF11 D10	3	45	1
CTRL48 sgF11 D10	3	43	1
CTRL48 sgF11 D10	3	48	1
CTRL48 sgF11 D10	3	43	1
CTRL48 sgF11 D10	3	45	1
CTRL48 sgF11 D10	3	80	2
CTRL48 sgF11 D10	3	43	1
CTRL48 sgF11 D10	3	45	1
CTRL48 sgF11 D10	3	45	1
CTRL48 sgF11 D10	3	45	1
CTRL48 sgF11 D10	3	47	1
CTRL48 sgF11 D10	3	44	1
CTRL48 sgF11 D10	3	39	1
CTRL48 sgF11 D10	3	42	1
CTRL48 sgF11 D10	3	90	2
CTRL48 sgF11 D10	3	39	1
CTRL48 sgF11 D10	3	36	1
CTRL48 sgF11 D10	3	41	1
CTRL48 sgF11 D10	3	41	1
CTRL48 sgF11 D10	3	46	1
CTRL48 sgF11 D10	3	39	1
CTRL48 sgF11 D10	3	32	1
CTRL48 sgF11 D10	3	45	1
CTRL48 sgF11 D10-17	1	45	1
CTRL48 sgF11 D10-17	1	44	1
CTRL48 sgF11 D10-17	1	44	1
CTRL48 sgF11 D10-17	1	44	1
CTRL48 sgF11 D10-17	1	42	1
CTRL48 sgF11 D10-17	1	44	1
CTRL48 sgF11 D10-17	1	43	1
CTRL48 sgF11 D10-17	1	43	1
CTRL48 sgF11 D10-17	1	44	1								1
CTRL48 sgF11 D10-17	1	45	1
CTRL48 sgF11 D10-17	1	44	1
CTRL48 sgF11 D10-17	1	37	1
CTRL48 sgF11 D10-17	1	42	1
CTRL48 sgF11 D10-17	1	44	1
CTRL48 sgF11 D10-17	1	45	1
CTRL48 sgF11 D10-17	1	44	1
CTRL48 sgF11 D10-17	1	87	2
CTRL48 sgF11 D10-17	1	45	1
CTRL48 sgF11 D10-17	1	44	1
CTRL48 sgF11 D10-17	1	42	1
CTRL48 sgF11 D10-17	1	36	0
CTRL48 sgF11 D10-17	1	78	2
CTRL48 sgF11 D10-17	1	45	1
CTRL48 sgF11 D10-17	1	45	1
CTRL48 sgF11 D10-17	1	45	1
CTRL48 sgF11 D10-17	1	44	1
CTRL48 sgF11 D10-17	1	43	1
CTRL48 sgF11 D10-17	1	45	1
CTRL48 sgF11 D10-17	1	44	1
CTRL48 sgF11 D10-17	1	45	1
CTRL48 sgF11 D10-17	2	43	1
CTRL48 sgF11 D10-17	2	43	1
CTRL48 sgF11 D10-17	2	43	1
CTRL48 sgF11 D10-17	2	43	1
CTRL48 sgF11 D10-17	2	43	1
CTRL48 sgF11 D10-17	2	45	1
CTRL48 sgF11 D10-17	2	44	1
CTRL48 sgF11 D10-17	2	45	1
CTRL48 sgF11 D10-17	2	45	1
CTRL48 sgF11 D10-17	2	43	1
CTRL48 sgF11 D10-17	2	44	1
CTRL48 sgF11 D10-17	2	44	1
CTRL48 sgF11 D10-17	2	43	1
CTRL48 sgF11 D10-17	2	46	1
CTRL48 sgF11 D10-17	2	45	1
CTRL48 sgF11 D10-17	2	42	1
CTRL48 sgF11 D10-17	2	45	1
CTRL48 sgF11 D10-17	2	42	1
CTRL48 sgF11 D10-17	2	43	1
CTRL48 sgF11 D10-17	2	45	1
CTRL48 sgF11 D10-17	2	40	1
CTRL48 sgF11 D10-17	2	44	1
CTRL48 sgF11 D10-17	2	40	1
CTRL48 sgF11 D10-17	2	46	1
CTRL48 sgF11 D10-17	2	45	1
CTRL48 sgF11 D10-17	2	43	1
CTRL48 sgF11 D10-17	2	38	1
CTRL48 sgF11 D10-17	2	42	1
CTRL48 sgF11 D10-17	2	43	1
CTRL48 sgF11 D10-17	2	41	1
CTRL48 sgF11 D10-17	3	45	1
CTRL48 sgF11 D10-17	3	43	1
CTRL48 sgF11 D10-17	3	88	2
CTRL48 sgF11 D10-17	3	44	1
CTRL48 sgF11 D10-17	3	45	1
CTRL48 sgF11 D10-17	3	47	1
CTRL48 sgF11 D10-17	3	88	2
CTRL48 sgF11 D10-17	3	45	1
CTRL48 sgF11 D10-17	3	44	1	1
CTRL48 sgF11 D10-17	3	48	1
CTRL48 sgF11 D10-17	3	44	1
CTRL48 sgF11 D10-17	3	43	1	1
CTRL48 sgF11 D10-17	3	44	1			1
CTRL48 sgF11 D10-17	3	92	2
CTRL48 sgF11 D10-17	3	44	1
CTRL48 sgF11 D10-17	3	45	1
CTRL48 sgF11 D10-17	3	45	1
CTRL48 sgF11 D10-17	3	43	1
CTRL48 sgF11 D10-17	3	45	1
CTRL48 sgF11 D10-17	3	42	1
CTRL48 sgF11 D10-17	3	84	2
CTRL48 sgF11 D10-17	3	44	1
CTRL48 sgF11 D10-17	3	45	1
CTRL48 sgF11 D10-17	3	82	2
CTRL48 sgF11 D10-17	3	43	1
CTRL48 sgF11 D10-17	3	45	1
CTRL48 sgF11 D10-17	3	45	1
CTRL48 sgF11 D10-17	3	41	1
CTRL48 sgF11 D10-17	3	43	1
CTRL48 sgF11 D10-17	3	36	0
SIS2-3 mock	1	45	1
SIS2-3 mock	1	44	1	1
SIS2-3 mock	1	45	1
SIS2-3 mock	1	42	1			1
SIS2-3 mock	1	46	1	1
SIS2-3 mock	1	45	1
SIS2-3 mock	1	44	1	1
SIS2-3 mock	1	45	1	1
SIS2-3 mock	1	46	1
SIS2-3 mock	1	44	1
SIS2-3 mock	1	43	1
SIS2-3 mock	1	45	1	1
SIS2-3 mock	1	45	1
SIS2-3 mock	1	44	1
SIS2-3 mock	1	45	1
SIS2-3 mock	1	46	1	1
SIS2-3 mock	1	46	1
SIS2-3 mock	1	44	1	1
SIS2-3 mock	1	45	1
SIS2-3 mock	1	47	1
SIS2-3 mock	1	45	1			1
SIS2-3 mock	1	44	1			1
SIS2-3 mock	1	44	1
SIS2-3 mock	1	43	1
SIS2-3 mock	1	45	1
SIS2-3 mock	1	45	1
SIS2-3 mock	1	44	1
SIS2-3 mock	1	89	2	1
SIS2-3 mock	1	46	1
SIS2-3 mock	1	45	1	1
SIS2-3 mock	2	44	1
SIS2-3 mock	2	43	1
SIS2-3 mock	2	43	1
SIS2-3 mock	2	45	1
SIS2-3 mock	2	43	1
SIS2-3 mock	2	84	2		2
SIS2-3 mock	2	45	1
SIS2-3 mock	2	45	1
SIS2-3 mock	2	41	1	1
SIS2-3 mock	2	45	1
SIS2-3 mock	2	45	1
SIS2-3 mock	2	46	1
SIS2-3 mock	2	43	1
SIS2-3 mock	2	43	1
SIS2-3 mock	2	45	1	1
SIS2-3 mock	2	45	1
SIS2-3 mock	2	44	1
SIS2-3 mock	2	43	1
SIS2-3 mock	2	42	1	1
SIS2-3 mock	2	45	1
SIS2-3 mock	2	43	1
SIS2-3 mock	2	48	1
SIS2-3 mock	2	45	1
SIS2-3 mock	2	44	1
SIS2-3 mock	2	90	2	2
SIS2-3 mock	2	45	1
SIS2-3 mock	2	45	1	1
SIS2-3 mock	2	45	1	1
SIS2-3 mock	2	42	1
SIS2-3 mock	2	41	1	1
SIS2-3 mock	3	44	1
SIS2-3 mock	3	44	1	1
SIS2-3 mock	3	60	2		2
SIS2-3 mock	3	46	1	1
SIS2-3 mock	3	45	1
SIS2-3 mock	3	43	1	1
SIS2-3 mock	3	42	1
SIS2-3 mock	3	44	1	1
SIS2-3 mock	3	45	1
SIS2-3 mock	3	46	1
SIS2-3 mock	3	44	1	1
SIS2-3 mock	3	44	1
SIS2-3 mock	3	44	1
SIS2-3 mock	3	42	1	1
SIS2-3 mock	3	44	1	1
SIS2-3 mock	3	44	1	1
SIS2-3 mock	3	44	1
SIS2-3 mock	3	45	1	1
SIS2-3 mock	3	45	1	1
SIS2-3 mock	3	40	1	1
SIS2-3 mock	3	41	1
SIS2-3 mock	3	43	1	1
SIS2-3 mock	3	44	1
SIS2-3 mock	3	89	2	2
SIS2-3 mock	3	43	1
SIS2-3 mock	3	42	1	1
SIS2-3 mock	3	48	1
SIS2-3 mock	3	45	1
SIS2-3 mock	3	42	1
SIS2-3 mock	3	45	1
SIS2-3 mCit D10	1	45	1
SIS2-3 mCit D10	1	44	1
SIS2-3 mCit D10	1	44	1	1
SIS2-3 mCit D10	1	44	1	1
SIS2-3 mCit D10	1	43	1
SIS2-3 mCit D10	1	44	1	1
SIS2-3 mCit D10	1	44	1
SIS2-3 mCit D10	1	45	1	1
SIS2-3 mCit D10	1	45	1	1
SIS2-3 mCit D10	1	45	1	1
SIS2-3 mCit D10	1	45	1
SIS2-3 mCit D10	1	45	1
SIS2-3 mCit D10	1	45	1
SIS2-3 mCit D10	1	44	1	1
SIS2-3 mCit D10	1	44	1	1
SIS2-3 mCit D10	1	46	1			1
SIS2-3 mCit D10	1	45	1	1
SIS2-3 mCit D10	1	46	1
SIS2-3 mCit D10	1	45	1
SIS2-3 mCit D10	1	44	1	1
SIS2-3 mCit D10	1	45	1	1
SIS2-3 mCit D10	1	38	1	1
SIS2-3 mCit D10	1	41	1	1
SIS2-3 mCit D10	1	47	1
SIS2-3 mCit D10	1	45	1	1
SIS2-3 mCit D10	1	44	1
SIS2-3 mCit D10	1	45	1
SIS2-3 mCit D10	1	43	1
SIS2-3 mCit D10	1	82	2
SIS2-3 mCit D10	1	84	2			2
SIS2-3 mCit D10	2	46	1
SIS2-3 mCit D10	2	45	1	1
SIS2-3 mCit D10	2	45	1
SIS2-3 mCit D10	2	44	1	1
SIS2-3 mCit D10	2	45	1
SIS2-3 mCit D10	2	45	1
SIS2-3 mCit D10	2	44	1	1
SIS2-3 mCit D10	2	45	1	1
SIS2-3 mCit D10	2	45	1
SIS2-3 mCit D10	2	40	1	1
SIS2-3 mCit D10	2	43	1
SIS2-3 mCit D10	2	45	1
SIS2-3 mCit D10	2	44	1
SIS2-3 mCit D10	2	44	1
SIS2-3 mCit D10	2	43	1
SIS2-3 mCit D10	2	45	1
SIS2-3 mCit D10	2	45	1
SIS2-3 mCit D10	2	46	1
SIS2-3 mCit D10	2	45	1
SIS2-3 mCit D10	2	45	1	1
SIS2-3 mCit D10	2	44	1	1
SIS2-3 mCit D10	2	43	1
SIS2-3 mCit D10	2	45	1	1
SIS2-3 mCit D10	2	45	1
SIS2-3 mCit D10	2	46	1			1
SIS2-3 mCit D10	2	44	1
SIS2-3 mCit D10	2	47	1
SIS2-3 mCit D10	2	45	1
SIS2-3 mCit D10	2	44	1
SIS2-3 mCit D10	2	44	1
SIS2-3 mCit D10	3	80	2
SIS2-3 mCit D10	3	46	1
SIS2-3 mCit D10	3	46	1	1
SIS2-3 mCit D10	3	44	1	1
SIS2-3 mCit D10	3	45	1	1
SIS2-3 mCit D10	3	44	1
SIS2-3 mCit D10	3	44	1			1
SIS2-3 mCit D10	3	45	1	1
SIS2-3 mCit D10	3	45	1	1
SIS2-3 mCit D10	3	45	1
SIS2-3 mCit D10	3	45	1
SIS2-3 mCit D10	3	45	1
SIS2-3 mCit D10	3	46	1	1
SIS2-3 mCit D10	3	45	1
SIS2-3 mCit D10	3	45	1	1
SIS2-3 mCit D10	3	45	1	1
SIS2-3 mCit D10	3	45	1	1
SIS2-3 mCit D10	3	45	1
SIS2-3 mCit D10	3	45	1	1
SIS2-3 mCit D10	3	46	1			1
SIS2-3 mCit D10	3	45	1	1
SIS2-3 mCit D10	3	44	1
SIS2-3 mCit D10	3	45	1
SIS2-3 mCit D10	3	45	1
SIS2-3 mCit D10	3	44	1	1
SIS2-3 mCit D10	3	43	1
SIS2-3 mCit D10	3	45	1	1
SIS2-3 mCit D10	3	45	1			1
SIS2-3 mCit D10	3	46	1
SIS2-3 mCit D10	3	44	1
SIS2-3 mCit D10-17	1	45	1
SIS2-3 mCit D10-17	1	42	1
SIS2-3 mCit D10-17	1	45	1
SIS2-3 mCit D10-17	1	47	1	1
SIS2-3 mCit D10-17	1	44	1
SIS2-3 mCit D10-17	1	61	2
SIS2-3 mCit D10-17	1	31	1	1
SIS2-3 mCit D10-17	1	43	1
SIS2-3 mCit D10-17	1	45	1	1
SIS2-3 mCit D10-17	1	45	1	1
SIS2-3 mCit D10-17	1	45	1
SIS2-3 mCit D10-17	1	43	1
SIS2-3 mCit D10-17	1	46	1	1
SIS2-3 mCit D10-17	1	44	1
SIS2-3 mCit D10-17	1	42	1
SIS2-3 mCit D10-17	1	42	1	1
SIS2-3 mCit D10-17	1	45	1	1
SIS2-3 mCit D10-17	1	45	1
SIS2-3 mCit D10-17	1	44	1
SIS2-3 mCit D10-17	1	46	1	1
SIS2-3 mCit D10-17	1	45	1			1
SIS2-3 mCit D10-17	1	44	1
SIS2-3 mCit D10-17	1	45	1	1
SIS2-3 mCit D10-17	1	44	1	1
SIS2-3 mCit D10-17	1	43	1
SIS2-3 mCit D10-17	1	42	1
SIS2-3 mCit D10-17	1	45	1						1
SIS2-3 mCit D10-17	1	43	1	1
SIS2-3 mCit D10-17	1	41	1	1
SIS2-3 mCit D10-17	1	41	1
SIS2-3 mCit D10-17	2	41	1	1
SIS2-3 mCit D10-17	2	44	1	1
SIS2-3 mCit D10-17	2	43	1	1
SIS2-3 mCit D10-17	2	44	1	1
SIS2-3 mCit D10-17	2	42	1
SIS2-3 mCit D10-17	2	88	2
SIS2-3 mCit D10-17	2	45	1	1
SIS2-3 mCit D10-17	2	45	1
SIS2-3 mCit D10-17	2	86	2
SIS2-3 mCit D10-17	2	80	2	2
SIS2-3 mCit D10-17	2	43	1
SIS2-3 mCit D10-17	2	44	1
SIS2-3 mCit D10-17	2	36	1
SIS2-3 mCit D10-17	2	82	2		2
SIS2-3 mCit D10-17	2	44	1
SIS2-3 mCit D10-17	2	43	1	1
SIS2-3 mCit D10-17	2	44	1	1
SIS2-3 mCit D10-17	2	40	1
SIS2-3 mCit D10-17	2	41	1
SIS2-3 mCit D10-17	2	44	1
SIS2-3 mCit D10-17	2	44	1	1
SIS2-3 mCit D10-17	2	43	1	1
SIS2-3 mCit D10-17	2	45	1
SIS2-3 mCit D10-17	2	44	1
SIS2-3 mCit D10-17	2	46	1
SIS2-3 mCit D10-17	2	44	1
SIS2-3 mCit D10-17	2	45	1
SIS2-3 mCit D10-17	2	45	1	1
SIS2-3 mCit D10-17	2	45	1
SIS2-3 mCit D10-17	2	43	1
SIS2-3 mCit D10-17	3	45	1	1
SIS2-3 mCit D10-17	3	45	1
SIS2-3 mCit D10-17	3	44	1
SIS2-3 mCit D10-17	3	45	1
SIS2-3 mCit D10-17	3	41	0
SIS2-3 mCit D10-17	3	43	1	1
SIS2-3 mCit D10-17	3	45	1
SIS2-3 mCit D10-17	3	45	1	1
SIS2-3 mCit D10-17	3	42	1
SIS2-3 mCit D10-17	3	44	1	1
SIS2-3 mCit D10-17	3	42	1	1
SIS2-3 mCit D10-17	3	58	1
SIS2-3 mCit D10-17	3	45	1			1
SIS2-3 mCit D10-17	3	40	1	1
SIS2-3 mCit D10-17	3	43	1
SIS2-3 mCit D10-17	3	39	1
SIS2-3 mCit D10-17	3	44	1	1
SIS2-3 mCit D10-17	3	44	1	1
SIS2-3 mCit D10-17	3	42	1
SIS2-3 mCit D10-17	3	44	1
SIS2-3 mCit D10-17	3	45	1
SIS2-3 mCit D10-17	3	44	1
SIS2-3 mCit D10-17	3	45	1	1
SIS2-3 mCit D10-17	3	44	1	1
SIS2-3 mCit D10-17	3	44	1
SIS2-3 mCit D10-17	3	44	1	1
SIS2-3 mCit D10-17	3	44	1
SIS2-3 mCit D10-17	3	46	1	1
SIS2-3 mCit D10-17	3	88	2
SIS2-3 mCit D10-17	3	42	1
SIS2-3 sgF11 D10	1	46	1	1
SIS2-3 sgF11 D10	1	43	1	1
SIS2-3 sgF11 D10	1	45	1	1
SIS2-3 sgF11 D10	1	45	1
SIS2-3 sgF11 D10	1	46	1
SIS2-3 sgF11 D10	1	40	1	1					1
SIS2-3 sgF11 D10	1	46	1
SIS2-3 sgF11 D10	1	44	1
SIS2-3 sgF11 D10	1	46	1
SIS2-3 sgF11 D10	1	44	1	1
SIS2-3 sgF11 D10	1	89	1	1
SIS2-3 sgF11 D10	1	43	1	1
SIS2-3 sgF11 D10	1	45	1
SIS2-3 sgF11 D10	1	45	1	1
SIS2-3 sgF11 D10	1	45	1
SIS2-3 sgF11 D10	1	45	1			1
SIS2-3 sgF11 D10	1	44	1
SIS2-3 sgF11 D10	1	44	1	1
SIS2-3 sgF11 D10	1	46	1			1		1
SIS2-3 sgF11 D10	1	91	2		2				1
SIS2-3 sgF11 D10	1	44	1			1
SIS2-3 sgF11 D10	1	47	1
SIS2-3 sgF11 D10	1	44	1							1
SIS2-3 sgF11 D10	1	45	1
SIS2-3 sgF11 D10	1	45	1
SIS2-3 sgF11 D10	1	40	1
SIS2-3 sgF11 D10	1	45	1			1
SIS2-3 sgF11 D10	1	44	1						1
SIS2-3 sgF11 D10	1	45	1						1
SIS2-3 sgF11 D10	1	35	1						1
SIS2-3 sgF11 D10	2	46	1
SIS2-3 sgF11 D10	2	44	1	1
SIS2-3 sgF11 D10	2	46	1
SIS2-3 sgF11 D10	2	45	1	1
SIS2-3 sgF11 D10	2	44	1	1
SIS2-3 sgF11 D10	2	46	1					1
SIS2-3 sgF11 D10	2	83	2
SIS2-3 sgF11 D10	2	46	1						1
SIS2-3 sgF11 D10	2	45	1						1
SIS2-3 sgF11 D10	2	43	1
SIS2-3 sgF11 D10	2	46	1						1
SIS2-3 sgF11 D10	2	45	1
SIS2-3 sgF11 D10	2	45	1
SIS2-3 sgF11 D10	2	33	1
SIS2-3 sgF11 D10	2	45	1	1
SIS2-3 sgF11 D10	2	44	1
SIS2-3 sgF11 D10	2	45	1
SIS2-3 sgF11 D10	2	45	1
SIS2-3 sgF11 D10	2	45	1
SIS2-3 sgF11 D10	2	45	1
SIS2-3 sgF11 D10	2	54	1
SIS2-3 sgF11 D10	2	44	1
SIS2-3 sgF11 D10	2	36	1
SIS2-3 sgF11 D10	2	45	1
SIS2-3 sgF11 D10	2	44	1					1
SIS2-3 sgF11 D10	2	45	1
SIS2-3 sgF11 D10	2	45	1							1
SIS2-3 sgF11 D10	2	45	1
SIS2-3 sgF11 D10	2	44	1	1
SIS2-3 sgF11 D10	2	38	1
SIS2-3 sgF11 D10	3	45	1
SIS2-3 sgF11 D10	3	22	0
SIS2-3 sgF11 D10	3	46	1	1
SIS2-3 sgF11 D10	3	46	1						1
SIS2-3 sgF11 D10	3	48	1						1
SIS2-3 sgF11 D10	3	41	0
SIS2-3 sgF11 D10	3	49	1						1
SIS2-3 sgF11 D10	3	44	1
SIS2-3 sgF11 D10	3	44	1
SIS2-3 sgF11 D10	3	45	1	1
SIS2-3 sgF11 D10	3	45	1
SIS2-3 sgF11 D10	3	45	1	1
SIS2-3 sgF11 D10	3	45	1	1
SIS2-3 sgF11 D10	3	45	1
SIS2-3 sgF11 D10	3	40	1	1
SIS2-3 sgF11 D10	3	48	1						1
SIS2-3 sgF11 D10	3	46	1						1
SIS2-3 sgF11 D10	3	41	1
SIS2-3 sgF11 D10	3	48	1	1
SIS2-3 sgF11 D10	3	43	1	1
SIS2-3 sgF11 D10	3	42	1
SIS2-3 sgF11 D10	3	85	2
SIS2-3 sgF11 D10	3	47	1					1
SIS2-3 sgF11 D10	3	44	1					1
SIS2-3 sgF11 D10	3	43	1					1
SIS2-3 sgF11 D10	3	44	1	1
SIS2-3 sgF11 D10	3	44	1
SIS2-3 sgF11 D10	3	46	1					1
SIS2-3 sgF11 D10	3	45	1
SIS2-3 sgF11 D10	3	48	1					1
SIS2-3 sgF11 D10-17	1	46	1	1
SIS2-3 sgF11 D10-17	1	42	1
SIS2-3 sgF11 D10-17	1	47	1	1
SIS2-3 sgF11 D10-17	1	46	1
SIS2-3 sgF11 D10-17	1	45	1
SIS2-3 sgF11 D10-17	1	45	1
SIS2-3 sgF11 D10-17	1	45	1
SIS2-3 sgF11 D10-17	1	47	1
SIS2-3 sgF11 D10-17	1	44	1	1
SIS2-3 sgF11 D10-17	1	47	1
SIS2-3 sgF11 D10-17	1	44	1
SIS2-3 sgF11 D10-17	1	50	1
SIS2-3 sgF11 D10-17	1	47	1
SIS2-3 sgF11 D10-17	1	44	1	1
SIS2-3 sgF11 D10-17	1	46	1
SIS2-3 sgF11 D10-17	1	45	1
SIS2-3 sgF11 D10-17	1	46	1
SIS2-3 sgF11 D10-17	1	45	1
SIS2-3 sgF11 D10-17	1	45	1
SIS2-3 sgF11 D10-17	1	45	1
SIS2-3 sgF11 D10-17	1	46	1
SIS2-3 sgF11 D10-17	1	43	1	1
SIS2-3 sgF11 D10-17	1	44	1	1
SIS2-3 sgF11 D10-17	1	45	1
SIS2-3 sgF11 D10-17	1	44	1
SIS2-3 sgF11 D10-17	1	45	1
SIS2-3 sgF11 D10-17	1	44	1
SIS2-3 sgF11 D10-17	1	43	1
SIS2-3 sgF11 D10-17	1	41	1
SIS2-3 sgF11 D10-17	1	82	2			2
SIS2-3 sgF11 D10-17	2	44	1
SIS2-3 sgF11 D10-17	2	44	1
SIS2-3 sgF11 D10-17	2	43	1	1
SIS2-3 sgF11 D10-17	2	44	1
SIS2-3 sgF11 D10-17	2	43	1	1
SIS2-3 sgF11 D10-17	2	46	1
SIS2-3 sgF11 D10-17	2	36	1	1
SIS2-3 sgF11 D10-17	2	40	1
SIS2-3 sgF11 D10-17	2	43	1	1
SIS2-3 sgF11 D10-17	2	41	1	1
SIS2-3 sgF11 D10-17	2	46	1
SIS2-3 sgF11 D10-17	2	45	1	1
SIS2-3 sgF11 D10-17	2	43	1
SIS2-3 sgF11 D10-17	2	44	1	1
SIS2-3 sgF11 D10-17	2	43	1	1
SIS2-3 sgF11 D10-17	2	45	1
SIS2-3 sgF11 D10-17	2	45	1
SIS2-3 sgF11 D10-17	2	44	1
SIS2-3 sgF11 D10-17	2	44	1
SIS2-3 sgF11 D10-17	2	47	1
SIS2-3 sgF11 D10-17	2	43	1	1
SIS2-3 sgF11 D10-17	2	44	1
SIS2-3 sgF11 D10-17	2	44	1	1
SIS2-3 sgF11 D10-17	2	83	2	2
SIS2-3 sgF11 D10-17	2	45	1
SIS2-3 sgF11 D10-17	2	45	1
SIS2-3 sgF11 D10-17	2	43	1	1
SIS2-3 sgF11 D10-17	2	42	1	1
SIS2-3 sgF11 D10-17	2	44	1	1
SIS2-3 sgF11 D10-17	2	80	2
SIS2-3 sgF11 D10-17	3	42	1
SIS2-3 sgF11 D10-17	3	48	1	1
SIS2-3 sgF11 D10-17	3	45	1
SIS2-3 sgF11 D10-17	3	45	1	1
SIS2-3 sgF11 D10-17	3	43	1
SIS2-3 sgF11 D10-17	3	88	4			1	2
SIS2-3 sgF11 D10-17	3	42	1	1
SIS2-3 sgF11 D10-17	3	44	1
SIS2-3 sgF11 D10-17	3	44	1	1
SIS2-3 sgF11 D10-17	3	43	1	1
SIS2-3 sgF11 D10-17	3	43	1								1
SIS2-3 sgF11 D10-17	3	45	1	1
SIS2-3 sgF11 D10-17	3	45	1
SIS2-3 sgF11 D10-17	3	43	1
SIS2-3 sgF11 D10-17	3	45	1
SIS2-3 sgF11 D10-17	3	42	1
SIS2-3 sgF11 D10-17	3	47	1
SIS2-3 sgF11 D10-17	3	45	1
SIS2-3 sgF11 D10-17	3	46	1
SIS2-3 sgF11 D10-17	3	87	1					1
SIS2-3 sgF11 D10-17	3	46	1	1
SIS2-3 sgF11 D10-17	3	45	1	1
SIS2-3 sgF11 D10-17	3	91	2		2
SIS2-3 sgF11 D10-17	3	47	1
SIS2-3 sgF11 D10-17	3	45	1
SIS2-3 sgF11 D10-17	3	45	1
SIS2-3 sgF11 D10-17	3	45	1
SIS2-3 sgF11 D10-17	3	82	2
SIS2-3 sgF11 D10-17	3	42	1			1
SIS2-3 sgF11 D10-17	3	42	1
