# Supplementary material for: Chromosome instability induced by a single defined sister chromatid fusion
Source: Life Sci Alliance. 2020 Oct 26;3(12):e202000911. doi: 10.26508/lsa.202000911 (PMC7652394; doi:10.26508/lsa.202000911)
Supplement: Supplementary file 6 [file LSA-2020-00911_SdataF4_F5_F6.xlsx]

## Sheet: Legend
Source Data for Fig 4-6	mCitrine-positive cell lineage was inspected manually. Note that serial number (Lineage_ID) has some missing numbers (lineages), which can be found at https://figshare.com/s/3fd3fb4e5571f14f1ecf. We have analyzed lineages in XpSIS1-15 and XpSIS2-36 cells as well, which were published in BioRxiv (https://doi.org/10.1101/607341) but not included in this manuscript.
Experiment	Names used in R and Rstan coding.
Lineage_ID	Serial number for whole lineages.
Lineage_ID2	Serial number for lineages in each experiment.
Lineage	Lineage starts from "o" cell, followed by "a" and "b" cells after mitosis. The "a" cell generates "aa" and "ab" cells, while the "b" generates "ba" and "bb" cells after mitosis and so on. When two cells fuse, the parental cells are connected by "^" sign. When cells regress (i. e. cytokinesis failure), two daughter cells are connected by "_" sign. For example, when "a" and "b" cells fuse, the resu…
Stage	When a given cell was already mCitrine positive in the beginning of the movie, the stage starts from "N"; while when a cell became mCitrine positive during the course of the movie, the stage starts from "1". The stages of cells increse by one following each mitosis.
M_phase	Cells entered in mitosis.
Death	Cells died during interphase.
Fusion	Cells fused with other cell.
Fusion_with	A partner of cell fusion. "u" means an unrelated cell. The number denotes Lineage_ID, which is omitted if a partner is in the same lineage.
Fusion_origin	Two parental cells of cell fusion.
Regress_origin	A parental cell before regress.
Int_duration	The unit is hours.
M_duration	The unit is minute. When cells did not enter mitosis, this column is blank.
Micronuc	Cells possessed small mCitrine positive nucleus out side of the main one.
Binuc	Cells possessed two mCitrine positive nucleus in similar size. Cells with multinuclei were also included.
Tripolar	Three cells were generated after cytokinesis.
Death_in_M	Cells died in mitosis.
Regress	Cells failed to generate two daughter cells after cytokinesis.
End_in_M	Movie finished in mitosis.
Dim	Cells showed fading of mCitrine.
Cells	Names in the paper.

## Sheet: Source Data for Fig4-6
Experiment	Lineage_ID	Lineage_ID2	Lineage	Stage	M_phase	Death	Fusion	Fusion_with	Fusion_origin	Regress_origin	Int_duration	M_duration	Micronuc	Binuc	Tripolar	Death_in_M	Regress	End_in_M	Dim	Cells
ctrl2	239	1	o	N	0	0	0				92.3		1	0	0	0	0	0	0	CTRL48-sgFUSION11
ctrl2	240	2	o	N	1	0	0				13.5	30	0	0	0	0	0	0	0	CTRL48-sgFUSION11
ctrl2	240	2	a	N+1	1	0	0				15.2	40	0	0	0	0	0	0	0	CTRL48-sgFUSION11
ctrl2	240	2	b	N+1	1	0	0				18.7	40	0	0	0	0	0	0	0	CTRL48-sgFUSION11
ctrl2	240	2	aa	N+2	1	0	0				20.7	50	0	0	0	0	0	0	0	CTRL48-sgFUSION11
ctrl2	240	2	ab	N+2	1	0	0				23	30	0	0	0	0	0	0	0	CTRL48-sgFUSION11
ctrl2	240	2	ba	N+2	1	0	0				26.5	50	0	0	0	1	0	0	0	CTRL48-sgFUSION11
ctrl2	240	2	bb	N+2	1	0	0				20.8	30	0	0	0	0	0	0	0	CTRL48-sgFUSION11
ctrl2	240	2	aaa	N+3	1	0	0				19.5	60	0	0	0	0	0	0	0	CTRL48-sgFUSION11
ctrl2	240	2	aab	N+3	1	0	0				17.7	40	0	0	0	0	0	0	0	CTRL48-sgFUSION11
ctrl2	240	2	aba	N+3	1	0	0				21.3	30	0	0	0	0	0	0	0	CTRL48-sgFUSION11
ctrl2	240	2	abb	N+3	0	0	0				11		0	0	0	0	0	0	0	CTRL48-sgFUSION11
ctrl2	240	2	bba	N+3	1	0	0				20.8	40	0	0	0	0	0	0	0	CTRL48-sgFUSION11
ctrl2	240	2	bbb	N+3	1	0	0				20.2	40	0	0	0	0	0	0	0	CTRL48-sgFUSION11
ctrl2	240	2	aaaa	N+4	0	0	0				20.5		0	0	0	0	0	0	0	CTRL48-sgFUSION11
ctrl2	240	2	aaab	N+4	1	0	0				19.3	40	0	0	0	0	0	0	0	CTRL48-sgFUSION11
ctrl2	240	2	aaba	N+4	0	0	0				22.7		0	0	0	0	0	0	0	CTRL48-sgFUSION11
ctrl2	240	2	aabb	N+4	0	0	0				22.7		0	0	0	0	0	0	0	CTRL48-sgFUSION11
ctrl2	240	2	abaa	N+4	0	0	0				17.2		0	0	0	0	0	0	0	CTRL48-sgFUSION11
ctrl2	240	2	abab	N+4	0	0	0				17.2		0	0	0	0	0	0	0	CTRL48-sgFUSION11
ctrl2	240	2	bbaa	N+4	0	0	0				16.2		0	0	0	0	0	0	0	CTRL48-sgFUSION11
ctrl2	240	2	bbab	N+4	0	0	0				16.2		0	0	0	0	0	0	0	CTRL48-sgFUSION11
ctrl2	240	2	bbba	N+4	0	0	0				16.8		0	0	0	0	0	0	0	CTRL48-sgFUSION11
ctrl2	240	2	bbbb	N+4	0	0	0				16.8		0	0	0	0	0	0	0	CTRL48-sgFUSION11
ctrl2	240	2	aaaba	N+5	0	0	0				0.5		0	0	0	0	0	0	0	CTRL48-sgFUSION11
ctrl2	240	2	aaabb	N+5	0	0	0				0.5		0	0	0	0	0	0	0	CTRL48-sgFUSION11
ctrl2	241	3	o	N	1	0	0				17.2	30	0	0	0	0	0	0	0	CTRL48-sgFUSION11
ctrl2	241	3	a	N+1	1	0	0				19.5	40	0	0	0	0	0	0	0	CTRL48-sgFUSION11
ctrl2	241	3	b	N+1	1	0	0				17.2	90	0	0	0	0	0	0	0	CTRL48-sgFUSION11
ctrl2	241	3	aa	N+2	0	0	0				54.5		0	0	0	0	0	0	0	CTRL48-sgFUSION11
ctrl2	241	3	ab	N+2	0	0	0				54.5		0	0	0	0	0	0	0	CTRL48-sgFUSION11
ctrl2	241	3	ba	N+2	1	0	0				21.7	40	0	0	0	0	0	0	0	CTRL48-sgFUSION11
ctrl2	241	3	bb	N+2	1	0	0				20.3	40	0	0	0	0	0	0	0	CTRL48-sgFUSION11
ctrl2	241	3	baa	N+3	0	0	0				33.7		0	0	0	0	0	0	0	CTRL48-sgFUSION11
ctrl2	241	3	bab	N+3	0	0	0				33.7		0	0	0	0	0	0	0	CTRL48-sgFUSION11
ctrl2	241	3	bba	N+3	0	0	0				35		0	0	0	0	0	0	0	CTRL48-sgFUSION11
ctrl2	241	3	bbb	N+3	0	0	0				35		0	0	0	0	0	0	0	CTRL48-sgFUSION11
ctrl2	242	4	o	N	1	0	0				14.2	50	0	0	0	0	0	0	0	CTRL48-sgFUSION11
ctrl2	242	4	a	N+1	1	0	0				19.7	40	0	0	0	0	0	0	0	CTRL48-sgFUSION11
ctrl2	242	4	b	N+1	1	0	0				18.3	20	0	0	0	0	0	0	0	CTRL48-sgFUSION11
ctrl2	242	4	aa	N+2	1	0	0				18.8	30	0	0	0	0	0	0	0	CTRL48-sgFUSION11
ctrl2	242	4	ab	N+2	1	0	0				24	40	0	0	0	0	0	0	0	CTRL48-sgFUSION11
ctrl2	242	4	ba	N+2	0	0	0				58.7		0	0	0	0	0	0	0	CTRL48-sgFUSION11
ctrl2	242	4	bb	N+2	1	0	0				21.3	50	0	0	0	0	0	0	0	CTRL48-sgFUSION11
ctrl2	242	4	aaa	N+3	1	0	0				20.2	40	0	0	0	0	0	0	0	CTRL48-sgFUSION11
ctrl2	242	4	aab	N+3	1	0	0				19.8	40	0	0	0	0	0	0	0	CTRL48-sgFUSION11
ctrl2	242	4	aba	N+3	1	0	0				20.3	30	0	0	0	0	0	0	0	CTRL48-sgFUSION11
ctrl2	242	4	abb	N+3	1	0	0				19.3	30	0	0	0	0	0	0	0	CTRL48-sgFUSION11
ctrl2	242	4	bba	N+3	0	1	0				8.8		0	0	0	0	0	0	0	CTRL48-sgFUSION11
ctrl2	242	4	bbb	N+3	1	0	0				20	40	0	0	0	0	0	0	0	CTRL48-sgFUSION11
ctrl2	242	4	aaaa	N+4	0	0	0				16.8		0	0	0	0	0	0	0	CTRL48-sgFUSION11
ctrl2	242	4	aaab	N+4	0	0	0				16.8		0	0	0	0	0	0	0	CTRL48-sgFUSION11
ctrl2	242	4	aaba	N+4	0	0	0				17.2		0	0	0	0	0	0	0	CTRL48-sgFUSION11
ctrl2	242	4	aabb	N+4	0	0	0				17.2		0	0	0	0	0	0	0	CTRL48-sgFUSION11
ctrl2	242	4	abaa	N+4	0	0	0				11.5		0	0	0	0	0	0	0	CTRL48-sgFUSION11
ctrl2	242	4	abab	N+4	0	0	0				11.5		0	0	0	0	0	0	0	CTRL48-sgFUSION11
ctrl2	242	4	abba	N+4	0	0	0				12.5		0	0	0	0	0	0	0	CTRL48-sgFUSION11
ctrl2	242	4	abbb	N+4	0	0	0				12.5		0	0	0	0	0	0	0	CTRL48-sgFUSION11
ctrl2	242	4	bbba	N+4	0	0	0				15.8		0	0	0	0	0	0	0	CTRL48-sgFUSION11
ctrl2	242	4	bbbb	N+4	0	0	0				15.8		0	0	0	0	0	0	0	CTRL48-sgFUSION11
ctrl2	243	5	o	N	0	0	0				92.3		0	0	0	0	0	0	0	CTRL48-sgFUSION11
ctrl2	244	6	o	N	1	0	0				24.7	50	0	0	0	0	0	0	0	CTRL48-sgFUSION11
ctrl2	244	6	a	N+1	1	0	0				16.8	30	0	0	0	0	0	0	0	CTRL48-sgFUSION11
ctrl2	244	6	b	N+1	1	0	0				17.5	40	0	0	0	0	0	0	0	CTRL48-sgFUSION11
ctrl2	244	6	aa	N+2	1	0	0				17.7	30	0	0	0	0	0	0	0	CTRL48-sgFUSION11
ctrl2	244	6	ab	N+2	1	0	0				19.2	40	0	0	0	0	0	0	0	CTRL48-sgFUSION11
ctrl2	244	6	ba	N+2	1	0	0				27.7	60	0	0	0	0	0	0	0	CTRL48-sgFUSION11
ctrl2	244	6	bb	N+2	1	0	0				23.8	40	0	0	0	0	0	0	0	CTRL48-sgFUSION11
ctrl2	244	6	aaa	N+3	1	0	0				16.8	60	0	0	0	0	0	0	0	CTRL48-sgFUSION11
ctrl2	244	6	aab	N+3	1	0	0				18.8	30	0	0	0	0	0	0	0	CTRL48-sgFUSION11
ctrl2	244	6	aba	N+3	1	0	0				15	40	0	0	0	0	0	0	0	CTRL48-sgFUSION11
ctrl2	244	6	abb	N+3	1	0	0				18.3	40	0	0	0	0	0	0	0	CTRL48-sgFUSION11
ctrl2	244	6	baa	N+3	1	0	0				15.3	50	0	0	0	0	0	0	0	CTRL48-sgFUSION11
ctrl2	244	6	bab	N+3	0	0	0				20		0	0	0	0	0	0	0	CTRL48-sgFUSION11
ctrl2	244	6	bba	N+3	1	0	0				15.5	40	0	0	0	0	0	0	0	CTRL48-sgFUSION11
ctrl2	244	6	bbb	N+3	0	0	0				24.2		0	0	0	0	0	0	0	CTRL48-sgFUSION11
ctrl2	244	6	aaaa	N+4	0	0	0				13.5		0	0	0	0	0	0	0	CTRL48-sgFUSION11
ctrl2	244	6	aaab	N+4	0	0	0				13.5		0	0	0	0	0	0	0	CTRL48-sgFUSION11
ctrl2	244	6	aaba	N+4	0	0	0				12		0	0	0	0	0	0	0	CTRL48-sgFUSION11
ctrl2	244	6	aabb	N+4	0	0	0				12		0	0	0	0	0	0	0	CTRL48-sgFUSION11
ctrl2	244	6	abaa	N+4	0	0	0				14		0	0	0	0	0	0	0	CTRL48-sgFUSION11
ctrl2	244	6	abab	N+4	0	0	0				14		0	0	0	0	0	0	0	CTRL48-sgFUSION11
ctrl2	244	6	abba	N+4	0	0	0				10.7		0	0	0	0	0	0	0	CTRL48-sgFUSION11
ctrl2	244	6	abbb	N+4	0	0	0				10.7		0	0	0	0	0	0	0	CTRL48-sgFUSION11
ctrl2	244	6	baaa	N+4	0	0	0				3.8		0	0	0	0	0	0	0	CTRL48-sgFUSION11
ctrl2	244	6	baab	N+4	0	0	0				3.8		0	0	0	0	0	0	0	CTRL48-sgFUSION11
ctrl2	244	6	bbaa	N+4	0	0	0				8		0	0	0	0	0	0	0	CTRL48-sgFUSION11
ctrl2	244	6	bbab	N+4	0	0	0				8		0	0	0	0	0	0	0	CTRL48-sgFUSION11
ctrl2	245	7	o	N	1	0	0				21	120	0	0	0	0	0	0	0	CTRL48-sgFUSION11
ctrl2	245	7	a	N+1	1	0	0				21.2	40	0	0	0	0	0	0	0	CTRL48-sgFUSION11
ctrl2	245	7	b	N+1	1	0	0				24.2	30	0	0	0	0	0	0	0	CTRL48-sgFUSION11
ctrl2	245	7	aa	N+2	1	0	0				17.8	40	0	0	0	0	0	0	0	CTRL48-sgFUSION11
ctrl2	245	7	ab	N+2	0	0	0				7		0	0	0	0	0	0	0	CTRL48-sgFUSION11
ctrl2	245	7	ba	N+2	1	0	0				17.5	50	0	0	0	0	0	0	0	CTRL48-sgFUSION11
ctrl2	245	7	bb	N+2	1	0	0				19.3	40	0	0	0	0	0	0	0	CTRL48-sgFUSION11
ctrl2	245	7	aaa	N+3	1	0	0				20.3	50	0	0	0	0	0	0	0	CTRL48-sgFUSION11
ctrl2	245	7	aab	N+3	1	0	0				17.7	50	0	0	0	0	0	0	0	CTRL48-sgFUSION11
ctrl2	245	7	baa	N+3	1	0	0				18	40	0	0	0	0	0	0	0	CTRL48-sgFUSION11
ctrl2	245	7	bab	N+3	1	0	0				17.8	40	0	0	0	0	0	0	0	CTRL48-sgFUSION11
ctrl2	245	7	bba	N+3	1	0	0				17.8	30	0	0	0	0	0	0	0	CTRL48-sgFUSION11
ctrl2	245	7	bbb	N+3	1	0	0				18.5	40	0	0	0	0	0	0	0	CTRL48-sgFUSION11
ctrl2	245	7	aaaa	N+4	0	0	0				7.8		0	0	0	0	0	0	0	CTRL48-sgFUSION11
ctrl2	245	7	aaab	N+4	0	0	0				7.8		0	0	0	0	0	0	0	CTRL48-sgFUSION11
ctrl2	245	7	aaba	N+4	0	0	0				10.5		0	0	0	0	0	0	0	CTRL48-sgFUSION11
ctrl2	245	7	aabb	N+4	0	0	0				10.5		0	0	0	0	0	0	0	CTRL48-sgFUSION11
ctrl2	245	7	baaa	N+4	0	0	0				7.7		0	0	0	0	0	0	0	CTRL48-sgFUSION11
ctrl2	245	7	baab	N+4	0	0	0				7.7		0	0	0	0	0	0	0	CTRL48-sgFUSION11
ctrl2	245	7	baba	N+4	0	0	0				7.8		0	0	0	0	0	0	0	CTRL48-sgFUSION11
ctrl2	245	7	babb	N+4	0	0	0				7.8		0	0	0	0	0	0	0	CTRL48-sgFUSION11
ctrl2	245	7	bbaa	N+4	0	0	0				6.3		0	0	0	0	0	0	0	CTRL48-sgFUSION11
ctrl2	245	7	bbab	N+4	0	0	0				6.3		0	0	0	0	0	0	0	CTRL48-sgFUSION11
ctrl2	245	7	bbba	N+4	0	0	0				5.5		0	0	0	0	0	0	0	CTRL48-sgFUSION11
ctrl2	245	7	bbbb	N+4	0	0	0				5.5		0	0	0	0	0	0	0	CTRL48-sgFUSION11
ctrl2	246	8	o	N	1	0	0				21.2	40	0	0	0	0	0	0	0	CTRL48-sgFUSION11
ctrl2	246	8	a	N+1	1	0	0				19.2	50	0	0	0	0	0	0	0	CTRL48-sgFUSION11
ctrl2	246	8	b	N+1	1	0	0				19.5	60	0	0	0	0	0	0	0	CTRL48-sgFUSION11
ctrl2	246	8	aa	N+2	0	1	0				3		0	0	0	0	0	0	0	CTRL48-sgFUSION11
ctrl2	246	8	ab	N+2	0	1	0				3		0	0	0	0	0	0	0	CTRL48-sgFUSION11
ctrl2	246	8	ba	N+2	0	1	0				2		0	0	0	0	0	0	0	CTRL48-sgFUSION11
ctrl2	246	8	bb	N+2	0	1	0				2		0	0	0	0	0	0	0	CTRL48-sgFUSION11
ctrl2	247	9	o	N	1	0	0				16	90	0	0	0	1	0	0	0	CTRL48-sgFUSION11
ctrl2	248	10	o	N	1	0	0				17.2	530	0	0	0	1	0	0	0	CTRL48-sgFUSION11
ctrl2	249	11	o	1	1	0	0				17.5	40	0	0	0	0	0	0	0	CTRL48-sgFUSION11
ctrl2	249	11	a	2	1	0	0				22.8	50	0	0	0	0	0	0	0	CTRL48-sgFUSION11
ctrl2	249	11	b	2	1	0	0				20.2	60	0	0	0	0	0	0	0	CTRL48-sgFUSION11
ctrl2	249	11	aa	3	1	0	0				18.2	30	0	0	0	0	0	0	0	CTRL48-sgFUSION11
ctrl2	249	11	ab	3	1	0	0				21.2	40	0	0	0	0	0	0	0	CTRL48-sgFUSION11
ctrl2	249	11	ba	3	1	0	0				18.8	50	0	0	0	0	0	0	0	CTRL48-sgFUSION11
ctrl2	249	11	bb	3	1	0	0				19.2	30	0	0	0	0	0	0	0	CTRL48-sgFUSION11
ctrl2	249	11	aaa	4	0	0	0				20.3		0	0	0	0	0	0	0	CTRL48-sgFUSION11
ctrl2	249	11	aab	4	0	0	0				20.3		0	0	0	0	0	0	0	CTRL48-sgFUSION11
ctrl2	249	11	aba	4	0	0	0				17.2		0	0	0	0	0	0	0	CTRL48-sgFUSION11
ctrl2	249	11	abb	4	0	0	0				17.2		0	0	0	0	0	0	0	CTRL48-sgFUSION11
ctrl2	249	11	baa	4	0	0	0				21.8		0	0	0	0	0	0	0	CTRL48-sgFUSION11
ctrl2	249	11	bab	4	1	0	0				19.8	40	0	0	0	0	0	0	0	CTRL48-sgFUSION11
ctrl2	249	11	bba	4	0	0	0				21.8		0	0	0	0	0	0	0	CTRL48-sgFUSION11
ctrl2	249	11	bbb	4	0	0	0				21.8		0	0	0	0	0	0	0	CTRL48-sgFUSION11
ctrl2	249	11	baba	5	0	0	0				1.3		0	0	0	0	0	0	0	CTRL48-sgFUSION11
ctrl2	249	11	babb	5	0	0	0				1.3		0	0	0	0	0	0	0	CTRL48-sgFUSION11
ctrl2	250	12	o	1	1	0	0				14.7	40	0	0	0	0	0	0	0	CTRL48-sgFUSION11
ctrl2	250	12	a	2	1	0	0				19.3	90	0	0	0	0	0	0	0	CTRL48-sgFUSION11
ctrl2	250	12	b	2	1	0	0				14.8	40	0	0	0	0	0	0	0	CTRL48-sgFUSION11
ctrl2	250	12	aa	3	1	0	0				25.7	140	0	0	0	0	0	0	0	CTRL48-sgFUSION11
ctrl2	250	12	ab	3	1	0	0				29	30	0	0	0	0	0	0	0	CTRL48-sgFUSION11
ctrl2	250	12	ba	3	1	0	0				18.2	40	0	0	0	0	0	0	0	CTRL48-sgFUSION11
ctrl2	250	12	bb	3	1	0	0				18.8	50	0	0	0	0	0	0	0	CTRL48-sgFUSION11
ctrl2	250	12	aaa	4	0	0	0				15.7		0	0	0	0	0	0	0	CTRL48-sgFUSION11
ctrl2	250	12	aab	4	0	0	0				15.7		0	0	0	0	0	0	0	CTRL48-sgFUSION11
ctrl2	250	12	aba	4	0	0	0				14.2		0	0	0	0	0	0	0	CTRL48-sgFUSION11
ctrl2	250	12	abb	4	0	0	0				14.2		0	0	0	0	0	0	0	CTRL48-sgFUSION11
ctrl2	250	12	baa	4	1	0	0				20	50	0	0	0	0	0	0	0	CTRL48-sgFUSION11
ctrl2	250	12	bab	4	1	0	0				17.2	40	0	0	0	0	0	0	0	CTRL48-sgFUSION11
ctrl2	250	12	bba	4	1	0	0				23.7	40	0	0	0	0	0	0	0	CTRL48-sgFUSION11
ctrl2	250	12	bbb	4	1	0	0				19	40	0	0	0	0	0	0	0	CTRL48-sgFUSION11
ctrl2	250	12	baaa	5	0	0	0				9.3		0	0	0	0	0	0	0	CTRL48-sgFUSION11
ctrl2	250	12	baab	5	0	0	0				9.3		0	0	0	0	0	0	0	CTRL48-sgFUSION11
ctrl2	250	12	baba	5	0	0	0				12.3		0	0	0	0	0	0	0	CTRL48-sgFUSION11
ctrl2	250	12	babb	5	0	0	0				12.3		0	0	0	0	0	0	0	CTRL48-sgFUSION11
ctrl2	250	12	bbaa	5	0	0	0				5		0	0	0	0	0	0	0	CTRL48-sgFUSION11
ctrl2	250	12	bbab	5	0	0	0				5		0	0	0	0	0	0	0	CTRL48-sgFUSION11
ctrl2	250	12	bbba	5	0	0	0				9.7		0	0	0	0	0	0	0	CTRL48-sgFUSION11
ctrl2	250	12	bbbb	5	0	0	0				9.7		0	0	0	0	0	0	0	CTRL48-sgFUSION11
ctrl2	251	13	o	1	1	0	0				11.7	40	0	0	0	0	0	0	0	CTRL48-sgFUSION11
ctrl2	251	13	a	2	1	0	0				17.8	40	0	0	0	0	0	0	0	CTRL48-sgFUSION11
ctrl2	251	13	b	2	1	0	0				20	30	0	0	0	0	0	0	0	CTRL48-sgFUSION11
ctrl2	251	13	aa	3	1	0	0				19	40	0	0	0	0	0	0	0	CTRL48-sgFUSION11
ctrl2	251	13	ab	3	1	0	0				18.3	40	0	0	0	0	0	0	0	CTRL48-sgFUSION11
ctrl2	251	13	ba	3	1	0	0				20	40	0	0	0	0	0	0	0	CTRL48-sgFUSION11
ctrl2	251	13	bb	3	1	0	0				22	40	0	0	0	0	0	0	0	CTRL48-sgFUSION11
ctrl2	251	13	aaa	4	1	0	0				18.3	30	0	0	0	0	0	0	0	CTRL48-sgFUSION11
ctrl2	251	13	aab	4	1	0	0				17.7	30	0	0	0	0	0	0	0	CTRL48-sgFUSION11
ctrl2	251	13	aba	4	1	0	0				20.5	40	0	0	0	0	0	0	0	CTRL48-sgFUSION11
ctrl2	251	13	abb	4	1	0	0				22.5	40	0	0	0	0	0	0	0	CTRL48-sgFUSION11
ctrl2	251	13	baa	4	1	0	0				20.5	30	0	0	0	0	0	0	0	CTRL48-sgFUSION11
ctrl2	251	13	bab	4	1	0	0				18.3	30	0	0	0	0	0	0	0	CTRL48-sgFUSION11
ctrl2	251	13	bba	4	1	0	0				22		0	0	0	0	0	1	0	CTRL48-sgFUSION11
ctrl2	251	13	bbb	4	1	0	0				22.5		0	0	0	0	0	1	0	CTRL48-sgFUSION11
ctrl2	251	13	aaaa	5	0	0	0				8.7		0	0	0	0	0	0	0	CTRL48-sgFUSION11
ctrl2	251	13	aaab	5	0	0	0				8.7		0	0	0	0	0	0	0	CTRL48-sgFUSION11
ctrl2	251	13	aaba	5	0	0	0				9.3		0	0	0	0	0	0	0	CTRL48-sgFUSION11
ctrl2	251	13	aabb	5	0	0	0				9.3		0	0	0	0	0	0	0	CTRL48-sgFUSION11
ctrl2	251	13	abaa	5	0	0	0				7		0	0	0	0	0	0	0	CTRL48-sgFUSION11
ctrl2	251	13	abab	5	0	0	0				7		0	0	0	0	0	0	0	CTRL48-sgFUSION11
ctrl2	251	13	abba	5	0	0	0				5		0	0	0	0	0	0	0	CTRL48-sgFUSION11
ctrl2	251	13	abbb	5	0	0	0				5		0	0	0	0	0	0	0	CTRL48-sgFUSION11
ctrl2	251	13	baaa	5	0	0	0				3.5		0	0	0	0	0	0	0	CTRL48-sgFUSION11
ctrl2	251	13	baab	5	0	0	0				3.5		0	0	0	0	0	0	0	CTRL48-sgFUSION11
ctrl2	251	13	baba	5	0	0	0				5.7		0	0	0	0	0	0	0	CTRL48-sgFUSION11
ctrl2	251	13	babb	5	0	0	0				5.7		0	0	0	0	0	0	0	CTRL48-sgFUSION11
ctrl2	252	14	o	1	1	0	0				10.3	30	0	0	0	0	0	0	0	CTRL48-sgFUSION11
ctrl2	252	14	a	2	1	0	0				17	30	0	0	0	0	0	0	0	CTRL48-sgFUSION11
ctrl2	252	14	b	2	1	0	0				15.8	30	0	0	0	0	0	0	0	CTRL48-sgFUSION11
ctrl2	252	14	aa	3	0	0	0				10		0	0	0	0	0	0	0	CTRL48-sgFUSION11
ctrl2	252	14	ab	3	0	0	0				10		0	0	0	0	0	0	0	CTRL48-sgFUSION11
ctrl2	252	14	ba	3	1	0	0				18	30	0	0	0	0	0	0	0	CTRL48-sgFUSION11
ctrl2	252	14	bb	3	1	0	0				19.3	40	0	0	0	0	0	0	0	CTRL48-sgFUSION11
ctrl2	252	14	baa	4	1	0	0				19	40	0	0	0	0	0	0	0	CTRL48-sgFUSION11
ctrl2	252	14	bab	4	1	0	0				18.2	40	0	0	0	0	0	0	0	CTRL48-sgFUSION11
ctrl2	252	14	bba	4	1	0	0				20.8	40	0	0	0	0	0	0	0	CTRL48-sgFUSION11
ctrl2	252	14	bbb	4	1	0	0				18.7	40	0	0	0	0	0	0	0	CTRL48-sgFUSION11
ctrl2	252	14	baaa	5	0	0	0				13.7		0	0	0	0	0	0	0	CTRL48-sgFUSION11
ctrl2	252	14	baab	5	0	0	0				13.7		0	0	0	0	0	0	0	CTRL48-sgFUSION11
ctrl2	252	14	baba	5	0	0	0				14.5		0	0	0	0	0	0	0	CTRL48-sgFUSION11
ctrl2	252	14	babb	5	0	0	0				14.5		0	0	0	0	0	0	0	CTRL48-sgFUSION11
ctrl2	252	14	bbaa	5	0	0	0				10.3		0	0	0	0	0	0	0	CTRL48-sgFUSION11
ctrl2	252	14	bbab	5	0	0	0				10.3		0	0	0	0	0	0	0	CTRL48-sgFUSION11
ctrl2	252	14	bbba	5	0	0	0				12.5		0	0	0	0	0	0	0	CTRL48-sgFUSION11
ctrl2	252	14	bbbb	5	0	0	0				12.5		0	0	0	0	0	0	0	CTRL48-sgFUSION11
ctrl2	253	15	o	1	1	0	0				4.8	50	0	0	0	0	0	0	0	CTRL48-sgFUSION11
ctrl2	253	15	a	2	1	0	0				17	40	0	0	0	0	0	0	0	CTRL48-sgFUSION11
ctrl2	253	15	b	2	1	0	0				13	40	0	0	0	0	0	0	0	CTRL48-sgFUSION11
ctrl2	253	15	aa	3	1	0	0				17.8	40	0	0	0	0	0	0	0	CTRL48-sgFUSION11
ctrl2	253	15	ab	3	1	0	0				19.3	40	0	0	0	0	0	0	0	CTRL48-sgFUSION11
ctrl2	253	15	ba	3	1	0	0				18.5	30	0	0	0	0	0	0	0	CTRL48-sgFUSION11
ctrl2	253	15	bb	3	1	0	0				17.8	40	0	0	0	0	0	0	0	CTRL48-sgFUSION11
ctrl2	253	15	aaa	4	1	0	0				20.3	50	0	0	0	0	0	0	0	CTRL48-sgFUSION11
ctrl2	253	15	aab	4	1	0	0				18.8	60	0	0	0	0	0	0	0	CTRL48-sgFUSION11
ctrl2	253	15	aba	4	0	1	0				18		0	0	0	0	0	0	0	CTRL48-sgFUSION11
ctrl2	253	15	abb	4	1	0	0				22	50	0	0	0	0	0	0	0	CTRL48-sgFUSION11
ctrl2	253	15	baa	4	1	0	0				22.7	40	0	0	0	0	0	0	0	CTRL48-sgFUSION11
ctrl2	253	15	bab	4	1	0	0				17.2	30	0	0	0	0	0	0	0	CTRL48-sgFUSION11
ctrl2	253	15	bba	4	1	0	0				30.7	20	0	0	0	0	0	0	0	CTRL48-sgFUSION11
ctrl2	253	15	bbb	4	1	0	0				41.8	20	0	0	0	0	0	0	0	CTRL48-sgFUSION11
ctrl2	253	15	aaaa	5	0	0	0				18		0	0	0	0	0	0	0	CTRL48-sgFUSION11
ctrl2	253	15	aaab	5	0	0	0				18		0	0	0	0	0	0	0	CTRL48-sgFUSION11
ctrl2	253	15	aaba	5	0	0	0				19.3		0	0	0	0	0	0	0	CTRL48-sgFUSION11
ctrl2	253	15	aabb	5	0	0	0				19.3		0	0	0	0	0	0	0	CTRL48-sgFUSION11
ctrl2	253	15	abba	5	0	0	0				14.8		0	0	0	0	0	0	0	CTRL48-sgFUSION11
ctrl2	253	15	abbb	5	0	0	0				14.8		0	0	0	0	0	0	0	CTRL48-sgFUSION11
ctrl2	253	15	baaa	5	0	0	0				19.3		0	0	0	0	0	0	0	CTRL48-sgFUSION11
ctrl2	253	15	baab	5	0	0	0				19.3		0	0	0	0	0	0	0	CTRL48-sgFUSION11
ctrl2	253	15	baba	5	1	0	0				17	50	0	0	0	0	0	0	0	CTRL48-sgFUSION11
ctrl2	253	15	babb	5	1	0	0				17.5	40	0	0	0	0	0	0	0	CTRL48-sgFUSION11
ctrl2	253	15	bbaa	5	0	0	0				12.2		0	0	0	0	0	0	0	CTRL48-sgFUSION11
ctrl2	253	15	bbab	5	0	0	0				12.2		0	0	0	0	0	0	0	CTRL48-sgFUSION11
ctrl2	253	15	bbba	5	0	0	0				1		0	0	0	0	0	0	0	CTRL48-sgFUSION11
ctrl2	253	15	bbbb	5	0	0	0				1		0	0	0	0	0	0	0	CTRL48-sgFUSION11
ctrl2	253	15	babaa	6	0	0	0				6		0	0	0	0	0	0	0	CTRL48-sgFUSION11
ctrl2	253	15	babab	6	0	0	0				6		0	0	0	0	0	0	0	CTRL48-sgFUSION11
ctrl2	253	15	babba	6	0	0	0				5.7		0	0	0	0	0	0	0	CTRL48-sgFUSION11
ctrl2	253	15	babbb	6	0	0	0				5.7		0	0	0	0	0	0	0	CTRL48-sgFUSION11
ctrl2	254	16	o	N	0	1	0				86.3		0	0	0	0	0	0	0	CTRL48-sgFUSION11
ctrl2	255	17	o	1	1	0	0				3	40	0	0	0	0	0	0	0	CTRL48-sgFUSION11
ctrl2	255	17	a	2	1	0	0				18.5	30	0	0	0	0	0	0	0	CTRL48-sgFUSION11
ctrl2	255	17	b	2	1	0	0				15.3	20	0	0	0	0	0	0	0	CTRL48-sgFUSION11
ctrl2	255	17	aa	3	1	0	0				18.7	90	0	0	0	0	0	0	0	CTRL48-sgFUSION11
ctrl2	255	17	ab	3	0	1	0				6		0	0	0	0	0	0	0	CTRL48-sgFUSION11
ctrl2	255	17	ba	3	1	0	0				21.3	40	0	0	0	0	0	0	0	CTRL48-sgFUSION11
ctrl2	255	17	bb	3	1	0	0				17	220	0	0	0	0	0	0	0	CTRL48-sgFUSION11
ctrl2	255	17	aaa	4	1	0	0				18	40	0	0	0	0	0	0	0	CTRL48-sgFUSION11
ctrl2	255	17	aab	4	1	0	0				14.7	40	0	0	0	0	0	0	0	CTRL48-sgFUSION11
ctrl2	255	17	baa	4	0	0	0				30.8		0	0	0	0	0	0	0	CTRL48-sgFUSION11
ctrl2	255	17	bab	4	0	1	0				12		0	0	0	0	0	0	0	CTRL48-sgFUSION11
ctrl2	255	17	bba	4	0	0	0				32.2		0	0	0	0	0	0	0	CTRL48-sgFUSION11
ctrl2	255	17	bbb	4	0	1	0				13		0	0	0	0	0	0	0	CTRL48-sgFUSION11
ctrl2	255	17	aaaa	5	0	0	0				10.7		0	0	0	0	0	0	0	CTRL48-sgFUSION11
ctrl2	255	17	aaab	5	0	0	0				10.7		0	0	0	0	0	0	0	CTRL48-sgFUSION11
ctrl2	255	17	aaba	5	0	0	0				14		0	0	0	0	0	0	0	CTRL48-sgFUSION11
ctrl2	255	17	aabb	5	0	0	0				14		0	0	0	0	0	0	0	CTRL48-sgFUSION11
ctrl2	256	18	o	1	1	0	0				7.7	40	0	0	0	0	0	0	0	CTRL48-sgFUSION11
ctrl2	256	18	a	2	1	0	0				18.2	40	0	0	0	0	0	0	0	CTRL48-sgFUSION11
ctrl2	256	18	b	2	1	0	0				17.2	40	0	0	0	0	0	0	0	CTRL48-sgFUSION11
ctrl2	256	18	aa	3	1	0	0				31.7	50	0	0	0	0	0	0	0	CTRL48-sgFUSION11
ctrl2	256	18	ab	3	0	0	0				34.2		0	0	0	0	0	0	0	CTRL48-sgFUSION11
ctrl2	256	18	ba	3	1	0	0				33.7	30	0	0	0	0	0	0	0	CTRL48-sgFUSION11
ctrl2	256	18	bb	3	0	0	0				35.2		0	0	0	0	0	0	0	CTRL48-sgFUSION11
ctrl2	256	18	aaa	4	0	0	0				1.7		0	0	0	0	0	0	0	CTRL48-sgFUSION11
ctrl2	256	18	aab	4	0	0	0				1.7		0	0	0	0	0	0	0	CTRL48-sgFUSION11
ctrl2	256	18	baa	4	0	0	0				1		0	0	0	0	0	0	0	CTRL48-sgFUSION11
ctrl2	256	18	bab	4	0	0	0				1		0	0	0	0	0	0	0	CTRL48-sgFUSION11
ctrl2	257	19	o	N	0	0	0				92.3		0	0	0	0	0	0	0	CTRL48-sgFUSION11
ctrl2	258	20	o	1	1	0	0				26.3	30	0	0	0	0	0	0	0	CTRL48-sgFUSION11
ctrl2	258	20	a	2	1	0	0				20.3	50	0	0	0	0	0	0	0	CTRL48-sgFUSION11
ctrl2	258	20	b	2	1	0	0				22.5	40	0	0	0	0	0	0	0	CTRL48-sgFUSION11
ctrl2	258	20	aa	3	1	0	0				19.5	40	0	0	0	0	0	0	0	CTRL48-sgFUSION11
ctrl2	258	20	ab	3	1	0	0				18.3	40	0	0	0	0	0	0	0	CTRL48-sgFUSION11
ctrl2	258	20	ba	3	1	0	0				19.3	80	0	0	0	0	0	0	0	CTRL48-sgFUSION11
ctrl2	258	20	bb	3	1	0	0				19.7	40	0	0	0	0	0	0	0	CTRL48-sgFUSION11
ctrl2	258	20	aaa	4	0	0	0				6		0	0	0	0	0	0	0	CTRL48-sgFUSION11
ctrl2	258	20	aab	4	0	0	0				6		0	0	0	0	0	0	0	CTRL48-sgFUSION11
ctrl2	258	20	aba	4	0	0	0				7.2		0	0	0	0	0	0	0	CTRL48-sgFUSION11
ctrl2	258	20	abb	4	0	0	0				7.2		0	0	0	0	0	0	0	CTRL48-sgFUSION11
ctrl2	258	20	baa	4	0	0	0				3.5		0	0	0	0	0	0	0	CTRL48-sgFUSION11
ctrl2	258	20	bab	4	0	0	0				3.5		0	0	0	0	0	0	0	CTRL48-sgFUSION11
ctrl2	258	20	bba	4	0	0	0				3.8		0	0	0	0	0	0	0	CTRL48-sgFUSION11
ctrl2	258	20	bbb	4	0	0	0				3.8		0	0	0	0	0	0	0	CTRL48-sgFUSION11
ctrl2	259	21	o	N	0	0	0				92.3		0	0	0	0	0	0	0	CTRL48-sgFUSION11
ctrl2	260	22	o	1	1	0	0				0	80	0	0	0	0	0	0	0	CTRL48-sgFUSION11
ctrl2	260	22	a	2	1	0	0				20.7	40	0	0	0	0	0	0	0	CTRL48-sgFUSION11
ctrl2	260	22	b	2	1	0	0				20.3	40	0	0	0	0	0	0	0	CTRL48-sgFUSION11
ctrl2	260	22	aa	3	0	0	0				13.3		0	0	0	0	0	0	0	CTRL48-sgFUSION11
ctrl2	260	22	ab	3	0	0	0				13.3		0	0	0	0	0	0	0	CTRL48-sgFUSION11
ctrl2	260	22	ba	3	0	0	0				13.7		0	0	0	0	0	0	0	CTRL48-sgFUSION11
ctrl2	260	22	bb	3	0	0	0				13.7		0	0	0	0	0	0	0	CTRL48-sgFUSION11
ctrl2	261	23	o	1	1	0	0				0	30	0	0	0	0	0	0	0	CTRL48-sgFUSION11
ctrl2	261	23	a	2	1	0	0				22.7	30	0	0	0	0	1	0	0	CTRL48-sgFUSION11
ctrl2	261	23	b	2	1	0	0				26	40	0	0	0	0	0	0	0	CTRL48-sgFUSION11
ctrl2	261	23	(aa_ab)	3	1	0	0			a	19	70	0	1	0	0	1	0	0	CTRL48-sgFUSION11
ctrl2	261	23	ba	3	1	0	0				17.2	40	0	0	0	0	0	0	0	CTRL48-sgFUSION11
ctrl2	261	23	bb	3	1	0	0				17.7	40	0	0	0	0	0	0	0	CTRL48-sgFUSION11
ctrl2	261	23	((aa_ab)a_(aa_ab)b)	4	1	0	0			(aa_ab)	21.2	80	0	0	0	0	0	0	0	CTRL48-sgFUSION11
ctrl2	261	23	baa	4	1	0	0				18.8	30	0	0	0	0	0	0	0	CTRL48-sgFUSION11
ctrl2	261	23	bab	4	1	0	0				18	30	0	0	0	0	0	0	0	CTRL48-sgFUSION11
ctrl2	261	23	bba	4	1	0	0				16.3	30	0	0	0	0	0	0	0	CTRL48-sgFUSION11
ctrl2	261	23	bbb	4	1	0	0				19	40	0	0	0	0	0	0	0	CTRL48-sgFUSION11
ctrl2	261	23	((aa_ab)a_(aa_ab)b)a	5	1	0	0				25.3		0	0	0	0	0	1	0	CTRL48-sgFUSION11
ctrl2	261	23	((aa_ab)a_(aa_ab)b)b	5	1	0	0				24	80	0	1	1	0	0	0	0	CTRL48-sgFUSION11
ctrl2	261	23	baaa	5	1	0	0				18.8	40	0	0	0	0	0	0	0	CTRL48-sgFUSION11
ctrl2	261	23	baab	5	1	0	0				17.7	30	0	0	0	0	0	0	0	CTRL48-sgFUSION11
ctrl2	261	23	baba	5	1	0	0				17	30	0	0	0	0	0	0	0	CTRL48-sgFUSION11
ctrl2	261	23	babb	5	1	0	0				17.2	40	0	0	0	0	0	0	0	CTRL48-sgFUSION11
ctrl2	261	23	bbaa	5	1	0	0				19	40	0	0	0	0	0	0	0	CTRL48-sgFUSION11
ctrl2	261	23	bbab	5	1	0	0				16.8	40	0	0	0	0	0	0	0	CTRL48-sgFUSION11
ctrl2	261	23	bbba	5	1	0	0				17.8	30	0	0	0	0	0	0	0	CTRL48-sgFUSION11
ctrl2	261	23	bbbb	5	1	0	0				19	40	0	0	0	0	0	0	0	CTRL48-sgFUSION11
ctrl2	261	23	baaaa	6	0	0	0				8.2		0	0	0	0	0	0	0	CTRL48-sgFUSION11
ctrl2	261	23	baaab	6	0	0	0				8.2		0	0	0	0	0	0	0	CTRL48-sgFUSION11
ctrl2	261	23	baaba	6	0	0	0				8.8		0	0	0	0	0	0	0	CTRL48-sgFUSION11
ctrl2	261	23	baabb	6	0	0	0				8.8		0	0	0	0	0	0	0	CTRL48-sgFUSION11
ctrl2	261	23	babaa	6	0	0	0				11.3		0	0	0	0	0	0	0	CTRL48-sgFUSION11
ctrl2	261	23	babab	6	0	0	0				11.3		0	0	0	0	0	0	0	CTRL48-sgFUSION11
ctrl2	261	23	babba	6	0	0	0				11.7		0	0	0	0	0	0	0	CTRL48-sgFUSION11
ctrl2	261	23	babbb	6	0	0	0				11.7		0	0	0	0	0	0	0	CTRL48-sgFUSION11
ctrl2	261	23	bbaaa	6	0	0	0				10.3		0	0	0	0	0	0	0	CTRL48-sgFUSION11
ctrl2	261	23	bbaab	6	0	0	0				10.3		0	0	0	0	0	0	0	CTRL48-sgFUSION11
ctrl2	261	23	bbaba	6	0	0	0				12.2		0	0	0	0	0	0	0	CTRL48-sgFUSION11
ctrl2	261	23	bbabb	6	0	0	0				12.2		0	0	0	0	0	0	0	CTRL48-sgFUSION11
ctrl2	261	23	bbbaa	6	0	0	0				7.8		0	0	0	0	0	0	0	CTRL48-sgFUSION11
ctrl2	261	23	bbbab	6	0	0	0				7.8		0	0	0	0	0	0	0	CTRL48-sgFUSION11
ctrl2	261	23	bbbba	6	0	0	0				7.2		0	0	0	0	0	0	0	CTRL48-sgFUSION11
ctrl2	261	23	bbbbb	6	0	0	0				7.2		0	0	0	0	0	0	0	CTRL48-sgFUSION11
ctrl2	262	24	o	N	1	0	0				12	30	0	0	0	0	0	0	0	CTRL48-sgFUSION11
ctrl2	262	24	a	N+1	1	0	0				19.8	40	0	0	0	0	0	0	0	CTRL48-sgFUSION11
ctrl2	262	24	b	N+1	1	0	0				19.3	60	0	0	0	0	0	0	0	CTRL48-sgFUSION11
ctrl2	262	24	aa	N+2	1	0	0				20	140	0	0	0	0	0	0	0	CTRL48-sgFUSION11
ctrl2	262	24	ab	N+2	1	0	0				17.7	40	0	0	0	0	0	0	0	CTRL48-sgFUSION11
ctrl2	262	24	ba	N+2	1	0	0				19	50	0	0	0	0	0	0	0	CTRL48-sgFUSION11
ctrl2	262	24	bb	N+2	0	0	0				5		0	0	0	0	0	0	0	CTRL48-sgFUSION11
ctrl2	262	24	aaa	N+3	0	0	0				22.7		0	0	0	0	0	0	0	CTRL48-sgFUSION11
ctrl2	262	24	aab	N+3	0	0	0				22.7		0	0	0	0	0	0	0	CTRL48-sgFUSION11
ctrl2	262	24	aba	N+3	1	0	0				20.2	180	1	0	0	0	0	0	0	CTRL48-sgFUSION11
ctrl2	262	24	abb	N+3	1	0	0				19.7	50	0	0	0	0	0	0	0	CTRL48-sgFUSION11
ctrl2	262	24	baa	N+3	1	0	0				22.3	40	0	0	0	0	0	0	0	CTRL48-sgFUSION11
ctrl2	262	24	bab	N+3	1	0	0				16.7	50	0	0	0	0	0	0	0	CTRL48-sgFUSION11
ctrl2	262	24	abaa	N+4	0	0	0				3.5		0	0	0	0	0	0	0	CTRL48-sgFUSION11
ctrl2	262	24	abab	N+4	0	0	0				3.5		0	0	0	0	0	0	0	CTRL48-sgFUSION11
ctrl2	262	24	abba	N+4	0	0	0				6.2		0	0	0	0	0	0	0	CTRL48-sgFUSION11
ctrl2	262	24	abbb	N+4	0	0	0				6.2		0	0	0	0	0	0	0	CTRL48-sgFUSION11
ctrl2	262	24	baaa	N+4	0	0	0				2.3		0	0	0	0	0	0	0	CTRL48-sgFUSION11
ctrl2	262	24	baab	N+4	0	0	0				2.3		0	0	0	0	0	0	0	CTRL48-sgFUSION11
ctrl2	262	24	baba	N+4	0	0	0				7.8		0	0	0	0	0	0	0	CTRL48-sgFUSION11
ctrl2	262	24	babb	N+4	0	0	0				7.8		0	0	0	0	0	0	0	CTRL48-sgFUSION11
ctrl2	263	25	o	N	0	0	0				92.3		0	0	0	0	0	0	0	CTRL48-sgFUSION11
ctrl2	264	26	o	N	0	0	0				92.3		0	0	0	0	0	0	0	CTRL48-sgFUSION11
ctrl2	265	27	o	1	1	0	0				5.2	60	0	0	0	0	0	0	0	CTRL48-sgFUSION11
ctrl2	265	27	a	2	1	0	0				27.7	50	0	0	0	0	0	0	0	CTRL48-sgFUSION11
ctrl2	265	27	b	2	1	0	0				24.2	40	0	0	0	0	0	0	0	CTRL48-sgFUSION11
ctrl2	265	27	aa	3	0	0	0				3.5		0	0	0	0	0	0	0	CTRL48-sgFUSION11
ctrl2	265	27	ab	3	0	0	0				3.5		0	0	0	0	0	0	0	CTRL48-sgFUSION11
ctrl2	265	27	ba	3	0	0	0				7.2		0	0	0	0	0	0	0	CTRL48-sgFUSION11
ctrl2	265	27	bb	3	0	0	0				7.2		0	0	0	0	0	0	0	CTRL48-sgFUSION11
ctrl2	266	28	o	N	0	0	0				34.8		0	0	0	0	0	0	0	CTRL48-sgFUSION11
ctrl2	267	29	o	N	1	0	0				0.8	30	0	0	0	0	0	0	0	CTRL48-sgFUSION11
ctrl2	267	29	a	N+1	1	0	0				20.3	40	0	0	0	0	0	0	0	CTRL48-sgFUSION11
ctrl2	267	29	b	N+1	1	0	0				21.8	40	0	0	0	0	0	0	0	CTRL48-sgFUSION11
ctrl2	267	29	aa	N+2	0	0	0				11		0	0	0	0	0	0	0	CTRL48-sgFUSION11
ctrl2	267	29	ab	N+2	0	0	0				11		0	0	0	0	0	0	0	CTRL48-sgFUSION11
ctrl2	267	29	ba	N+2	0	0	0				9.5		0	0	0	0	0	0	0	CTRL48-sgFUSION11
ctrl2	267	29	bb	N+2	0	0	0				9.5		0	0	0	0	0	0	0	CTRL48-sgFUSION11
ctrl2	268	30	o	N	1	0	0				5	30	0	0	0	0	0	0	0	CTRL48-sgFUSION11
ctrl2	268	30	a	N+1	1	0	0				19.8	40	0	0	0	0	0	0	0	CTRL48-sgFUSION11
ctrl2	268	30	b	N+1	1	0	0				18.7	50	0	0	0	0	0	0	0	CTRL48-sgFUSION11
ctrl2	268	30	aa	N+2	0	0	0				7		0	0	0	0	0	0	0	CTRL48-sgFUSION11
ctrl2	268	30	ab	N+2	0	0	0				7		0	0	0	0	0	0	0	CTRL48-sgFUSION11
ctrl2	268	30	ba	N+2	0	0	0				8		0	0	0	0	0	0	0	CTRL48-sgFUSION11
ctrl2	268	30	bb	N+2	0	0	0				8		0	0	0	0	0	0	0	CTRL48-sgFUSION11
ctrl2	269	31	o	N	0	0	0				67.2		0	0	0	0	0	0	0	CTRL48-sgFUSION11
ctrl2	270	32	o	N	0	0	0				62.2		0	1	0	0	0	0	0	CTRL48-sgFUSION11
ctrl2	271	33	o	N	1	0	0				20	2170	0	0	0	0	0	1	0	CTRL48-sgFUSION11
ctrl2	272	34	o	N	1	0	0				14.2	50	0	0	0	0	0	0	0	CTRL48-sgFUSION11
ctrl2	272	34	a	N+1	1	0	0				19.2	60	0	0	0	0	0	0	0	CTRL48-sgFUSION11
ctrl2	272	34	b	N+1	1	0	0				21.7	40	0	0	0	0	0	0	0	CTRL48-sgFUSION11
ctrl2	272	34	aa	N+2	0	0	0				25.3		0	0	0	0	0	0	0	CTRL48-sgFUSION11
ctrl2	272	34	ab	N+2	0	0	0				25.3		0	0	0	0	0	0	0	CTRL48-sgFUSION11
ctrl2	272	34	ba	N+2	0	0	0				23.2		0	0	0	0	0	0	0	CTRL48-sgFUSION11
ctrl2	272	34	bb	N+2	0	0	0				23.2		0	0	0	0	0	0	0	CTRL48-sgFUSION11
ctrl2	273	35	o	N	1	0	0				15.3	220	1	0	0	0	0	0	0	CTRL48-sgFUSION11
ctrl2	273	35	a	N+1	0	0	0				2		0	1	0	0	0	0	0	CTRL48-sgFUSION11
ctrl2	273	35	b	N+1	0	0	0				2		0	1	0	0	0	0	0	CTRL48-sgFUSION11
ctrl2	274	36	o	N	1	0	0				16	40	0	0	0	0	0	0	0	CTRL48-sgFUSION11
ctrl2	274	36	a	N+1	1	0	0				23.5	60	0	0	0	0	0	0	0	CTRL48-sgFUSION11
ctrl2	274	36	b	N+1	0	0	0				39.2		0	0	0	0	0	0	0	CTRL48-sgFUSION11
ctrl2	274	36	aa	N+2	0	0	0				14.7		0	0	0	0	0	0	0	CTRL48-sgFUSION11
ctrl2	274	36	ab	N+2	0	0	0				14.7		0	0	0	0	0	0	0	CTRL48-sgFUSION11
ctrl2	275	37	o	N	1	0	0				10.8	50	0	0	0	0	0	0	0	CTRL48-sgFUSION11
ctrl2	275	37	a	N+1	1	0	0				17.3	60	0	0	0	0	0	0	0	CTRL48-sgFUSION11
ctrl2	275	37	b	N+1	1	0	0				15.3	40	0	0	0	0	0	0	0	CTRL48-sgFUSION11
ctrl2	275	37	aa	N+2	1	0	0				19.3	40	0	0	0	0	0	0	0	CTRL48-sgFUSION11
ctrl2	275	37	ab	N+2		0	1	ba			19		0	0	0	0	0	0	0	CTRL48-sgFUSION11
ctrl2	275	37	ba	N+2		0	1	ab			21.3		1	0	0	0	0	0	0	CTRL48-sgFUSION11
ctrl2	275	37	(ab^ba)	N+2	1	0	0		ab ba		0	60	1	0	1	0	0	0	0	CTRL48-sgFUSION11
ctrl2	275	37	bb	N+2	1	0	0				16.8	50	0	0	0	0	0	0	0	CTRL48-sgFUSION11
ctrl2	275	37	aaa	N+3	0	0	0				1.8		0	0	0	0	0	0	0	CTRL48-sgFUSION11
ctrl2	275	37	aab	N+3	0	0	0				1.8		0	0	0	0	0	0	0	CTRL48-sgFUSION11
ctrl2	275	37	(ab^ba)a	N+3	0	0	0				1.8		1	0	0	0	0	0	0	CTRL48-sgFUSION11
ctrl2	275	37	(ab^ba)b	N+3	0	0	0				1.8		0	0	0	0	0	0	0	CTRL48-sgFUSION11
ctrl2	275	37	(ab^ba)c	N+3	0	0	0				1.8		0	0	0	0	0	0	0	CTRL48-sgFUSION11
ctrl2	275	37	bba	N+3	0	0	0				6.5		0	0	0	0	0	0	0	CTRL48-sgFUSION11
ctrl2	275	37	bbb	N+3	0	0	0				6.5		0	0	0	0	0	0	0	CTRL48-sgFUSION11
ctrl2	276	38	o	N	1	0	0				18.5	50	0	0	0	0	0	0	0	CTRL48-sgFUSION11
ctrl2	276	38	a	N+1	1	0	0				23.3	50	0	0	0	0	0	0	0	CTRL48-sgFUSION11
ctrl2	276	38	b	N+1	1	0	0				22	70	0	0	0	0	0	0	0	CTRL48-sgFUSION11
ctrl2	276	38	aa	N+2	0	0	0				19		0	0	0	0	0	0	0	CTRL48-sgFUSION11
ctrl2	276	38	ab	N+2	0	0	0				19		0	0	0	0	0	0	0	CTRL48-sgFUSION11
ctrl2	276	38	ba	N+2	0	0	0				20		0	0	0	0	0	0	0	CTRL48-sgFUSION11
ctrl2	276	38	bb	N+2	0	0	0				20		0	0	0	0	0	0	0	CTRL48-sgFUSION11
ctrl2	277	39	o	N	0	0	0				29		0	0	0	0	0	0	0	CTRL48-sgFUSION11
ctrl2	278	40	o	N	1	0	0				24.5	40	0	0	0	0	0	0	0	CTRL48-sgFUSION11
ctrl2	278	40	a	N+1	1	0	0				18.7	40	0	0	0	0	0	0	0	CTRL48-sgFUSION11
ctrl2	278	40	b	N+1	1	0	0				18.8	30	0	0	0	0	0	0	0	CTRL48-sgFUSION11
ctrl2	278	40	aa	N+2	0	0	0				29		0	0	0	0	0	0	0	CTRL48-sgFUSION11
ctrl2	278	40	ab	N+2	1	0	0				24	30	0	0	0	0	0	0	0	CTRL48-sgFUSION11
ctrl2	278	40	ba	N+2	1	0	0				20.2	40	0	0	0	0	0	0	0	CTRL48-sgFUSION11
ctrl2	278	40	bb	N+2	1	0	0				17.2	40	0	0	0	0	0	0	0	CTRL48-sgFUSION11
ctrl2	278	40	aba	N+3	0	0	0				4.5		0	0	0	0	0	0	0	CTRL48-sgFUSION11
ctrl2	278	40	abb	N+3	0	0	0				4.5		0	0	0	0	0	0	0	CTRL48-sgFUSION11
ctrl2	278	40	baa	N+3	0	0	0				8.2		0	0	0	0	0	0	0	CTRL48-sgFUSION11
ctrl2	278	40	bab	N+3	0	0	0				8.2		0	0	0	0	0	0	0	CTRL48-sgFUSION11
ctrl2	278	40	bba	N+3	0	0	0				11.2		0	0	0	0	0	0	0	CTRL48-sgFUSION11
ctrl2	278	40	bbb	N+3	0	0	0				11.2		0	0	0	0	0	0	0	CTRL48-sgFUSION11
ctrl2	279	41	o	N	1	0	0				0	50	0	0	0	0	0	0	0	CTRL48-sgFUSION11
ctrl2	279	41	a	N+1	0	0	0				55		0	0	0	0	0	0	0	CTRL48-sgFUSION11
ctrl2	279	41	b	N+1	0	0	0				70.7		0	0	0	0	0	0	0	CTRL48-sgFUSION11
ctrl2	280	42	o	N	0	0	0				92.3		0	0	0	0	0	0	0	CTRL48-sgFUSION11
ctrl2	281	43	o	N	1	0	0				7	50	0	0	0	0	0	0	0	CTRL48-sgFUSION11
ctrl2	281	43	a	N+1	0	0	0				84.5		0	0	0	0	0	0	0	CTRL48-sgFUSION11
ctrl2	281	43	b	N+1	0	0	0				84.5		0	0	0	0	0	0	0	CTRL48-sgFUSION11
ctrl2	282	44	o	N	0	0	0				92.3		0	0	0	0	0	0	0	CTRL48-sgFUSION11
ctrl2	283	45	o	N	0	1	0				9		0	0	0	0	0	0	0	CTRL48-sgFUSION11
ctrl2	284	46	o	N	1	0	0				1	50	0	0	0	0	0	0	0	CTRL48-sgFUSION11
ctrl2	284	46	a	N+1	1	0	0				21.3	30	0	0	0	0	0	0	0	CTRL48-sgFUSION11
ctrl2	284	46	b	N+1	1	0	0				21.2	30	0	0	0	0	0	0	0	CTRL48-sgFUSION11
ctrl2	284	46	aa	N+2	0	0	0				11		0	0	0	0	0	0	0	CTRL48-sgFUSION11
ctrl2	284	46	ab	N+2	1	0	0				23.3	70	0	0	0	0	0	0	0	CTRL48-sgFUSION11
ctrl2	284	46	ba	N+2	1	0	0				23.2	30	0	0	0	0	0	0	0	CTRL48-sgFUSION11
ctrl2	284	46	bb	N+2	1	0	0				17	60	0	0	0	0	0	0	0	CTRL48-sgFUSION11
ctrl2	284	46	aba	N+3	0	0	0				15.8		0	0	0	0	0	0	0	CTRL48-sgFUSION11
ctrl2	284	46	abb	N+3	0	0	0				15.8		0	0	0	0	0	0	0	CTRL48-sgFUSION11
ctrl2	284	46	baa	N+3	0	0	0				16.8		0	0	0	0	0	0	0	CTRL48-sgFUSION11
ctrl2	284	46	bab	N+3	0	0	0				16.8		0	0	0	0	0	0	0	CTRL48-sgFUSION11
ctrl2	284	46	bba	N+3	0	0	0				22.5		0	0	0	0	0	0	0	CTRL48-sgFUSION11
ctrl2	284	46	bbb	N+3	0	0	0				22.5		0	0	0	0	0	0	0	CTRL48-sgFUSION11
ctrl2	285	47	o	N	1	0	0				16.7	30	0	0	0	0	0	0	0	CTRL48-sgFUSION11
ctrl2	285	47	a	N+1	1	0	0				16.8	70	0	0	0	0	0	0	0	CTRL48-sgFUSION11
ctrl2	285	47	b	N+1	1	0	0				19.5	30	0	0	0	0	1	0	0	CTRL48-sgFUSION11
ctrl2	285	47	aa	N+2	1	0	0				18.2	30	0	0	0	0	0	0	0	CTRL48-sgFUSION11
ctrl2	285	47	ab	N+2	1	0	0				18.5	30	0	0	0	0	0	0	0	CTRL48-sgFUSION11
ctrl2	285	47	(ba_bb)	N+2	0	1	0			b	2		0	0	0	0	0	0	0	CTRL48-sgFUSION11
ctrl2	285	47	aaa	N+3	0	0	0				31.3		0	0	0	0	0	0	0	CTRL48-sgFUSION11
ctrl2	285	47	aab	N+3	0	0	0				31.3		1	0	0	0	0	0	0	CTRL48-sgFUSION11
ctrl2	285	47	aba	N+3	1	0	0				21.3	30	0	0	0	0	0	0	0	CTRL48-sgFUSION11
ctrl2	285	47	abb	N+3	1	0	0				20.8	40	0	0	0	0	0	0	0	CTRL48-sgFUSION11
ctrl2	285	47	abaa	N+4	0	0	0				9.2		0	0	0	0	0	0	0	CTRL48-sgFUSION11
ctrl2	285	47	abab	N+4	0	0	0				9.2		0	0	0	0	0	0	0	CTRL48-sgFUSION11
ctrl2	285	47	abba	N+4	0	0	0				9.5		0	0	0	0	0	0	0	CTRL48-sgFUSION11
ctrl2	285	47	abbb	N+4	0	0	0				9.5		0	0	0	0	0	0	0	CTRL48-sgFUSION11
ctrl2	286	48	o	N	1	0	0				4.7	40	0	0	0	0	0	0	0	CTRL48-sgFUSION11
ctrl2	286	48	a	N+1	1	0	0				22.7	40	0	0	0	0	0	0	0	CTRL48-sgFUSION11
ctrl2	286	48	b	N+1	1	0	0				22.5	30	0	0	0	0	0	0	0	CTRL48-sgFUSION11
ctrl2	286	48	aa	N+2	1	0	0				24.2	50	0	0	0	0	0	0	0	CTRL48-sgFUSION11
ctrl2	286	48	ab	N+2	1	0	0				23.2	20	0	0	0	0	0	0	0	CTRL48-sgFUSION11
ctrl2	286	48	ba	N+2	1	0	0				22.5	30	0	0	0	0	0	0	0	CTRL48-sgFUSION11
ctrl2	286	48	bb	N+2	1	0	0				21.7	30	0	0	0	0	0	0	0	CTRL48-sgFUSION11
ctrl2	286	48	aaa	N+3	0	0	0				12.5		0	0	0	0	0	0	0	CTRL48-sgFUSION11
ctrl2	286	48	aab	N+3	0	0	0				12.5		0	0	0	0	0	0	0	CTRL48-sgFUSION11
ctrl2	286	48	aba	N+3	0	0	0				14		0	0	0	0	0	0	0	CTRL48-sgFUSION11
ctrl2	286	48	abb	N+3	0	0	0				14		0	0	0	0	0	0	0	CTRL48-sgFUSION11
ctrl2	286	48	baa	N+3	0	0	0				14.8		0	0	0	0	0	0	0	CTRL48-sgFUSION11
ctrl2	286	48	bab	N+3	0	0	0				14.8		0	0	0	0	0	0	0	CTRL48-sgFUSION11
ctrl2	286	48	bba	N+3	0	0	0				15.6		0	0	0	0	0	0	0	CTRL48-sgFUSION11
ctrl2	286	48	bbb	N+3	0	0	0				15.6		0	0	0	0	0	0	0	CTRL48-sgFUSION11
ctrl2	287	49	o	1	0	0	0				81.2		0	1	0	0	0	0	0	CTRL48-sgFUSION11
ctrl2	288	50	o	N	1	0	0				1.2	80	0	0	0	0	0	0	0	CTRL48-sgFUSION11
ctrl2	288	50	a	N+1	1	0	0				15.5	2320	0	0	0	1	0	0	0	CTRL48-sgFUSION11
ctrl2	288	50	b	N+1	1	0	0				22.3	1730	0	0	0	1	0	0	0	CTRL48-sgFUSION11
ctrl2	289	51	o	N	1	0	0				12.3	130	0	0	0	0	0	0	0	CTRL48-sgFUSION11
ctrl2	289	51	a	N+1	1	0	0				21.5	40	0	0	0	0	0	0	0	CTRL48-sgFUSION11
ctrl2	289	51	b	N+1	1	0	0				18.3	30	0	0	0	0	0	0	0	CTRL48-sgFUSION11
ctrl2	289	51	aa	N+2	1	0	0				19.2	40	0	0	0	0	0	0	0	CTRL48-sgFUSION11
ctrl2	289	51	ab	N+2	1	0	0				18.3	30	0	0	0	0	0	0	0	CTRL48-sgFUSION11
ctrl2	289	51	ba	N+2	1	0	0				19.8	40	0	0	0	0	0	0	0	CTRL48-sgFUSION11
ctrl2	289	51	bb	N+2	1	0	0				19	30	0	0	0	0	0	0	0	CTRL48-sgFUSION11
ctrl2	289	51	aaa	N+3	1	0	0				18.2	40	0	0	0	0	0	0	0	CTRL48-sgFUSION11
ctrl2	289	51	aab	N+3	1	0	0				18.8	30	0	0	0	0	0	0	0	CTRL48-sgFUSION11
ctrl2	289	51	aba	N+3	1	0	0				17.7	30	0	0	0	0	0	0	0	CTRL48-sgFUSION11
ctrl2	289	51	abb	N+3	1	0	0				19.2	40	0	0	0	0	0	0	0	CTRL48-sgFUSION11
ctrl2	289	51	baa	N+3	1	0	0				21.3	30	0	0	0	0	0	0	0	CTRL48-sgFUSION11
ctrl2	289	51	bab	N+3	1	0	0				20.3	40	0	0	0	0	0	0	0	CTRL48-sgFUSION11
ctrl2	289	51	bba	N+3	1	0	0				20.3	30	0	0	0	0	0	0	0	CTRL48-sgFUSION11
ctrl2	289	51	bbb	N+3	1	0	0				22	70	0	0	0	0	0	0	0	CTRL48-sgFUSION11
ctrl2	289	51	aaaa	N+4	0	0	0				17		0	0	0	0	0	0	0	CTRL48-sgFUSION11
ctrl2	289	51	aaab	N+4	0	0	0				17		0	0	0	0	0	0	0	CTRL48-sgFUSION11
ctrl2	289	51	aaba	N+4	0	0	0				16.5		0	0	0	0	0	0	0	CTRL48-sgFUSION11
ctrl2	289	51	aabb	N+4	0	0	0				16.5		0	0	0	0	0	0	0	CTRL48-sgFUSION11
ctrl2	289	51	abaa	N+4	0	0	0				18.7		0	0	0	0	0	0	0	CTRL48-sgFUSION11
ctrl2	289	51	abab	N+4	1	0	0				16.8	40	0	0	0	0	0	0	0	CTRL48-sgFUSION11
ctrl2	289	51	abba	N+4	0	0	0				17		0	0	0	0	0	0	0	CTRL48-sgFUSION11
ctrl2	289	51	abbb	N+4	0	0	0				17		0	0	0	0	0	0	0	CTRL48-sgFUSION11
ctrl2	289	51	baaa	N+4	0	0	0				16.7		0	0	0	0	0	0	0	CTRL48-sgFUSION11
ctrl2	289	51	baab	N+4	0	0	0				16.7		0	0	0	0	0	0	0	CTRL48-sgFUSION11
ctrl2	289	51	baba	N+4	0	0	0				17.5		0	0	0	0	0	0	0	CTRL48-sgFUSION11
ctrl2	289	51	babb	N+4	0	0	0				17.5		0	0	0	0	0	0	0	CTRL48-sgFUSION11
ctrl2	289	51	bbaa	N+4	0	0	0				18.7		0	0	0	0	0	0	0	CTRL48-sgFUSION11
ctrl2	289	51	bbab	N+4	1	0	0				17	30	0	0	0	0	0	0	0	CTRL48-sgFUSION11
ctrl2	289	51	bbba	N+4	0	0	0				16.3		0	0	0	0	0	0	0	CTRL48-sgFUSION11
ctrl2	289	51	bbbb	N+4	0	0	0				16.3		0	0	0	0	0	0	0	CTRL48-sgFUSION11
ctrl2	289	51	ababa	N+5	0	0	0				1.2		0	0	0	0	0	0	0	CTRL48-sgFUSION11
ctrl2	289	51	ababb	N+5	0	0	0				1.2		0	0	0	0	0	0	0	CTRL48-sgFUSION11
ctrl2	289	51	bbaba	N+5	0	0	0				1.2		0	0	0	0	0	0	0	CTRL48-sgFUSION11
ctrl2	289	51	bbabb	N+5	0	0	0				1.2		0	0	0	0	0	0	0	CTRL48-sgFUSION11
ctrl2	290	52	o	N	1	0	0				40.2	50	0	0	0	0	0	0	0	CTRL48-sgFUSION11
ctrl2	290	52	a	N+1	1	0	0				20.5	40	0	0	0	0	0	0	0	CTRL48-sgFUSION11
ctrl2	290	52	b	N+1	1	0	0				19.8	40	0	0	0	0	0	0	0	CTRL48-sgFUSION11
ctrl2	290	52	aa	N+2	1	0	0				19.8	20	0	0	0	0	0	0	0	CTRL48-sgFUSION11
ctrl2	290	52	ab	N+2	1	0	0				20.3	50	0	0	0	0	0	0	0	CTRL48-sgFUSION11
ctrl2	290	52	ba	N+2	1	0	0				24.5	40	0	0	0	0	0	0	0	CTRL48-sgFUSION11
ctrl2	290	52	bb	N+2	1	0	0				27.3	70	0	0	0	0	0	0	0	CTRL48-sgFUSION11
ctrl2	290	52	aaa	N+3	0	0	0				10		0	0	0	0	0	0	0	CTRL48-sgFUSION11
ctrl2	290	52	aab	N+3	0	0	0				10		0	0	0	0	0	0	0	CTRL48-sgFUSION11
ctrl2	290	52	aba	N+3	0	0	0				9		0	0	0	0	0	0	0	CTRL48-sgFUSION11
ctrl2	290	52	abb	N+3	0	0	0				9		0	0	0	0	0	0	0	CTRL48-sgFUSION11
ctrl2	290	52	baa	N+3	0	0	0				5.7		0	0	0	0	0	0	0	CTRL48-sgFUSION11
ctrl2	290	52	bab	N+3	0	0	0				5.7		0	0	0	0	0	0	0	CTRL48-sgFUSION11
ctrl2	290	52	bba	N+3	0	0	0				2.3		0	0	0	0	0	0	0	CTRL48-sgFUSION11
ctrl2	290	52	bbb	N+3	0	0	0				2.3		0	0	0	0	0	0	0	CTRL48-sgFUSION11
ctrl2	291	53	o	N	1	0	0				33	30	0	0	0	0	0	0	0	CTRL48-sgFUSION11
ctrl2	291	53	a	N+1	0	0	0				58.8		0	0	0	0	0	0	0	CTRL48-sgFUSION11
ctrl2	291	53	b	N+1	1	0	0				25.7	40	0	0	0	0	0	0	0	CTRL48-sgFUSION11
ctrl2	291	53	ba	N+2	0	0	0				32.5		0	0	0	0	0	0	0	CTRL48-sgFUSION11
ctrl2	291	53	bb	N+2	1	0	0				22.7	50	0	0	0	0	0	0	0	CTRL48-sgFUSION11
ctrl2	291	53	bba	N+3	0	0	0				9		0	0	0	0	0	0	0	CTRL48-sgFUSION11
ctrl2	291	53	bbb	N+3	0	0	0				9		0	0	0	0	0	0	0	CTRL48-sgFUSION11
ctrl2	292	54	o	1	1	0	0				27	40	0	0	0	0	0	0	0	CTRL48-sgFUSION11
ctrl2	292	54	a	2	1	0	0				18.7	30	0	0	0	0	0	0	0	CTRL48-sgFUSION11
ctrl2	292	54	b	2	1	0	0				15.8	40	0	0	0	0	0	0	0	CTRL48-sgFUSION11
ctrl2	292	54	aa	3	1	0	0				18.2	30	0	0	0	0	0	0	0	CTRL48-sgFUSION11
ctrl2	292	54	ab	3	1	0	0				17	30	0	0	0	0	0	0	0	CTRL48-sgFUSION11
ctrl2	292	54	ba	3	1	0	0				18.2	40	0	0	0	0	0	0	0	CTRL48-sgFUSION11
ctrl2	292	54	bb	3	1	0	0				18.5	40	0	0	0	0	0	0	0	CTRL48-sgFUSION11
ctrl2	292	54	aaa	4	1	0	0				23.5	30	0	0	0	0	0	0	0	CTRL48-sgFUSION11
ctrl2	292	54	aab	4	1	0	0				22.5	40	0	0	0	0	0	0	0	CTRL48-sgFUSION11
ctrl2	292	54	aba	4	1	0	0				21.5	50	0	0	0	0	0	0	0	CTRL48-sgFUSION11
ctrl2	292	54	abb	4	1	0	0				23.2	30	0	0	0	0	0	0	0	CTRL48-sgFUSION11
ctrl2	292	54	baa	4	1	0	0				20.7	40	0	0	0	0	0	0	0	CTRL48-sgFUSION11
ctrl2	292	54	bab	4	1	0	0				20.5	30	0	0	0	0	0	0	0	CTRL48-sgFUSION11
ctrl2	292	54	bba	4	1	0	0				20.7	30	0	0	0	0	0	0	0	CTRL48-sgFUSION11
ctrl2	292	54	bbb	4	1	0	0				19.8	40	0	0	0	0	0	0	0	CTRL48-sgFUSION11
ctrl2	292	54	aaaa	5	0	0	0				2.8		0	0	0	0	0	0	0	CTRL48-sgFUSION11
ctrl2	292	54	aaab	5	0	0	0				2.8		0	0	0	0	0	0	0	CTRL48-sgFUSION11
ctrl2	292	54	aaba	5	0	0	0				3.7		0	0	0	0	0	0	0	CTRL48-sgFUSION11
ctrl2	292	54	aabb	5	0	0	0				3.7		0	0	0	0	0	0	0	CTRL48-sgFUSION11
ctrl2	292	54	abaa	5	0	0	0				5.7		0	0	0	0	0	0	0	CTRL48-sgFUSION11
ctrl2	292	54	abab	5	0	0	0				5.7		0	0	0	0	0	0	0	CTRL48-sgFUSION11
ctrl2	292	54	abba	5	0	0	0				4.3		0	0	0	0	0	0	0	CTRL48-sgFUSION11
ctrl2	292	54	abbb	5	0	0	0				4.3		0	0	0	0	0	0	0	CTRL48-sgFUSION11
ctrl2	292	54	baaa	5	0	0	0				8		0	0	0	0	0	0	0	CTRL48-sgFUSION11
ctrl2	292	54	baab	5	0	0	0				8		0	0	0	0	0	0	0	CTRL48-sgFUSION11
ctrl2	292	54	baba	5	0	0	0				8.3		0	0	0	0	0	0	0	CTRL48-sgFUSION11
ctrl2	292	54	babb	5	0	0	0				8.3		0	0	0	0	0	0	0	CTRL48-sgFUSION11
ctrl2	292	54	bbaa	5	0	0	0				7.8		0	0	0	0	0	0	0	CTRL48-sgFUSION11
ctrl2	292	54	bbab	5	0	0	0				7.8		0	0	0	0	0	0	0	CTRL48-sgFUSION11
ctrl2	292	54	bbba	5	0	0	0				8.5		0	0	0	0	0	0	0	CTRL48-sgFUSION11
ctrl2	292	54	bbbb	5	0	0	0				8.5		0	0	0	0	0	0	0	CTRL48-sgFUSION11
ctrl2	293	55	o	1	1	0	0				1.8	50	0	0	0	0	0	0	0	CTRL48-sgFUSION11
ctrl2	293	55	a	2	1	0	0				23.2	50	0	0	0	0	0	0	0	CTRL48-sgFUSION11
ctrl2	293	55	b	2	1	0	0				21.7	30	0	0	0	0	0	0	0	CTRL48-sgFUSION11
ctrl2	293	55	aa	3	1	0	0				27.5	60	0	0	0	0	0	0	0	CTRL48-sgFUSION11
ctrl2	293	55	ab	3	1	0	0				21.3	40	0	0	0	0	0	0	0	CTRL48-sgFUSION11
ctrl2	293	55	ba	3	1	0	0				20.8	40	0	0	0	0	0	0	0	CTRL48-sgFUSION11
ctrl2	293	55	bb	3	1	0	0				19.7	30	0	0	0	0	0	0	0	CTRL48-sgFUSION11
ctrl2	293	55	aaa	4	1	0	0				22.2	30	0	0	0	0	0	0	0	CTRL48-sgFUSION11
ctrl2	293	55	aab	4	1	0	0				20.5	30	0	0	0	0	0	0	0	CTRL48-sgFUSION11
ctrl2	293	55	aba	4	1	0	0				21.7	30	0	0	0	0	0	0	0	CTRL48-sgFUSION11
ctrl2	293	55	abb	4	1	0	0				22.3	40	0	0	0	0	0	0	0	CTRL48-sgFUSION11
ctrl2	293	55	baa	4	1	0	0				22.7	30	0	0	0	0	0	0	0	CTRL48-sgFUSION11
ctrl2	293	55	bab	4	1	0	0				25.7	30	0	0	0	0	0	0	0	CTRL48-sgFUSION11
ctrl2	293	55	bba	4	1	0	0				19.2	30	0	0	0	0	0	0	0	CTRL48-sgFUSION11
ctrl2	293	55	bbb	4	1	0	0				19.8	50	0	0	0	0	0	0	0	CTRL48-sgFUSION11
ctrl2	293	55	aaaa	5	0	0	0				2.5		0	0	0	0	0	0	0	CTRL48-sgFUSION11
ctrl2	293	55	aaab	5	0	0	0				2.5		0	0	0	0	0	0	0	CTRL48-sgFUSION11
ctrl2	293	55	aaba	5	0	0	0				4.2		0	0	0	0	0	0	0	CTRL48-sgFUSION11
ctrl2	293	55	aabb	5	0	0	0				4.2		0	0	0	0	0	0	0	CTRL48-sgFUSION11
ctrl2	293	55	abaa	5	0	0	0				9.5		0	0	0	0	0	0	0	CTRL48-sgFUSION11
ctrl2	293	55	abab	5	0	0	0				9.5		0	0	0	0	0	0	0	CTRL48-sgFUSION11
ctrl2	293	55	abba	5	0	0	0				8.7		0	0	0	0	0	0	0	CTRL48-sgFUSION11
ctrl2	293	55	abbb	5	0	0	0				8.7		0	0	0	0	0	0	0	CTRL48-sgFUSION11
ctrl2	293	55	baaa	5	0	0	0				10.8		0	0	0	0	0	0	0	CTRL48-sgFUSION11
ctrl2	293	55	baab	5	0	0	0				10.8		0	0	0	0	0	0	0	CTRL48-sgFUSION11
ctrl2	293	55	baba	5	0	0	0				7.8		0	0	0	0	0	0	0	CTRL48-sgFUSION11
ctrl2	293	55	babb	5	0	0	0				7.8		0	0	0	0	0	0	0	CTRL48-sgFUSION11
ctrl2	293	55	bbaa	5	0	0	0				15.7		0	0	0	0	0	0	0	CTRL48-sgFUSION11
ctrl2	293	55	bbab	5	0	0	0				15.7		0	0	0	0	0	0	0	CTRL48-sgFUSION11
ctrl2	293	55	bbba	5	0	0	0				14.7		0	0	0	0	0	0	0	CTRL48-sgFUSION11
ctrl2	293	55	bbbb	5	0	0	0				14.7		0	0	0	0	0	0	0	CTRL48-sgFUSION11
ctrl2	294	56	o	N	1	0	0				4.5	40	0	0	0	0	0	0	0	CTRL48-sgFUSION11
ctrl2	294	56	a	N+1	1	0	0				18	40	0	0	0	0	0	0	0	CTRL48-sgFUSION11
ctrl2	294	56	b	N+1	1	0	0				21	20	0	0	0	0	0	0	0	CTRL48-sgFUSION11
ctrl2	294	56	aa	N+2	0	1	0				14.2		0	0	0	0	0	0	0	CTRL48-sgFUSION11
ctrl2	294	56	ab	N+2	1	0	0				22.3	30	0	0	0	0	0	0	0	CTRL48-sgFUSION11
ctrl2	294	56	ba	N+2	1	0	0				21	40	0	0	0	0	0	0	0	CTRL48-sgFUSION11
ctrl2	294	56	bb	N+2	1	0	0				21.8	30	0	0	0	0	0	0	0	CTRL48-sgFUSION11
ctrl2	294	56	aba	N+3	1	0	0				21.8	30	0	0	0	0	0	0	0	CTRL48-sgFUSION11
ctrl2	294	56	abb	N+3	1	0	0				21.5	60	0	0	0	0	0	0	0	CTRL48-sgFUSION11
ctrl2	294	56	baa	N+3	1	0	0				20.5	40	0	0	0	0	0	0	0	CTRL48-sgFUSION11
ctrl2	294	56	bab	N+3	1	0	0				20.5	110	0	0	0	0	0	0	0	CTRL48-sgFUSION11
ctrl2	294	56	bba	N+3	1	0	0				19.3	40	0	0	0	0	0	0	0	CTRL48-sgFUSION11
ctrl2	294	56	bbb	N+3	1	0	0				20.2	60	0	0	0	0	0	0	0	CTRL48-sgFUSION11
ctrl2	294	56	abaa	N+4	1	0	0				19.5	40	0	0	0	0	0	0	0	CTRL48-sgFUSION11
ctrl2	294	56	abab	N+4	1	0	0				18.2	40	0	0	0	0	0	0	0	CTRL48-sgFUSION11
ctrl2	294	56	abba	N+4	1	0	0				21	40	0	0	0	0	0	0	0	CTRL48-sgFUSION11
ctrl2	294	56	abbb	N+4	1	0	0				21.3	40	0	0	0	0	0	0	0	CTRL48-sgFUSION11
ctrl2	294	56	baaa	N+4	1	0	0				19.8	40	0	0	0	0	0	0	0	CTRL48-sgFUSION11
ctrl2	294	56	baab	N+4	0	0	0				23		0	0	0	0	0	0	0	CTRL48-sgFUSION11
ctrl2	294	56	baba	N+4	1	0	0				19.3	30	0	0	0	0	0	0	0	CTRL48-sgFUSION11
ctrl2	294	56	babb	N+4	1	0	0				16.3	40	0	0	0	0	0	0	0	CTRL48-sgFUSION11
ctrl2	294	56	bbaa	N+4	1	0	0				20.8	40	0	0	0	0	0	0	0	CTRL48-sgFUSION11
ctrl2	294	56	bbab	N+4	1	0	0				19.7	90	0	0	0	0	0	0	0	CTRL48-sgFUSION11
ctrl2	294	56	bbba	N+4	1	0	0				16.7	40	0	0	0	0	0	0	0	CTRL48-sgFUSION11
ctrl2	294	56	bbbb	N+4	1	0	0				20.2	40	0	0	0	0	0	0	0	CTRL48-sgFUSION11
ctrl2	294	56	abaaa	N+5	0	0	0				3.2		0	0	0	0	0	0	0	CTRL48-sgFUSION11
ctrl2	294	56	abaab	N+5	0	0	0				3.2		0	0	0	0	0	0	0	CTRL48-sgFUSION11
ctrl2	294	56	ababa	N+5	0	0	0				4.5		0	0	0	0	0	0	0	CTRL48-sgFUSION11
ctrl2	294	56	ababb	N+5	0	0	0				4.5		0	0	0	0	0	0	0	CTRL48-sgFUSION11
ctrl2	294	56	abbaa	N+5	0	0	0				1.5		0	0	0	0	0	0	0	CTRL48-sgFUSION11
ctrl2	294	56	abbab	N+5	0	0	0				1.5		0	0	0	0	0	0	0	CTRL48-sgFUSION11
ctrl2	294	56	abbba	N+5	0	0	0				1.2		0	0	0	0	0	0	0	CTRL48-sgFUSION11
ctrl2	294	56	abbbb	N+5	0	0	0				1.2		0	0	0	0	0	0	0	CTRL48-sgFUSION11
ctrl2	294	56	baaaa	N+5	0	0	0				2.5		0	0	0	0	0	0	0	CTRL48-sgFUSION11
ctrl2	294	56	baaab	N+5	0	0	0				2.5		0	0	0	0	0	0	0	CTRL48-sgFUSION11
ctrl2	294	56	babaa	N+5	0	0	0				2		0	0	0	0	0	0	0	CTRL48-sgFUSION11
ctrl2	294	56	babab	N+5	0	0	0				2		0	0	0	0	0	0	0	CTRL48-sgFUSION11
ctrl2	294	56	babba	N+5	0	0	0				4.8		0	0	0	0	0	0	0	CTRL48-sgFUSION11
ctrl2	294	56	babbb	N+5	0	0	0				4.8		0	0	0	0	0	0	0	CTRL48-sgFUSION11
ctrl2	294	56	bbaaa	N+5	0	0	0				2		0	0	0	0	0	0	0	CTRL48-sgFUSION11
ctrl2	294	56	bbaab	N+5	0	0	0				2		0	0	0	0	0	0	0	CTRL48-sgFUSION11
ctrl2	294	56	bbaba	N+5	0	0	0				2.3		0	0	0	0	0	0	0	CTRL48-sgFUSION11
ctrl2	294	56	bbabb	N+5	0	0	0				2.3		0	0	0	0	0	0	0	CTRL48-sgFUSION11
ctrl2	294	56	bbbaa	N+5	0	0	0				5		0	0	0	0	0	0	0	CTRL48-sgFUSION11
ctrl2	294	56	bbbab	N+5	0	0	0				5		0	0	0	0	0	0	0	CTRL48-sgFUSION11
ctrl2	294	56	bbbba	N+5	0	0	0				1.5		0	0	0	0	0	0	0	CTRL48-sgFUSION11
ctrl2	294	56	bbbbb	N+5	0	0	0				1.5		0	0	0	0	0	0	0	CTRL48-sgFUSION11
ctrl2	295	57	o	N	0	1	0				19		0	0	0	0	0	0	0	CTRL48-sgFUSION11
ctrl2	296	58	o	1	1	0	0				23.7	40	0	0	0	0	0	0	0	CTRL48-sgFUSION11
ctrl2	296	58	a	2	1	0	0				21.2	40	0	0	0	0	0	0	0	CTRL48-sgFUSION11
ctrl2	296	58	b	2	1	0	0				20.5	30	0	0	0	0	0	0	0	CTRL48-sgFUSION11
ctrl2	296	58	aa	3	1	0	0				19.8	40	0	0	0	0	0	0	0	CTRL48-sgFUSION11
ctrl2	296	58	ab	3	1	0	0				20	40	0	0	0	0	0	0	0	CTRL48-sgFUSION11
ctrl2	296	58	ba	3	1	0	0				21.8	30	0	0	0	0	0	0	0	CTRL48-sgFUSION11
ctrl2	296	58	bb	3	1	0	0				19.3	30	0	0	0	0	0	0	0	CTRL48-sgFUSION11
ctrl2	296	58	aaa	4	0	0	0				1.5		0	0	0	0	0	0	0	CTRL48-sgFUSION11
ctrl2	296	58	aab	4	0	0	0				1.5		0	0	0	0	0	0	0	CTRL48-sgFUSION11
ctrl2	296	58	aba	4	0	0	0				1.3		0	0	0	0	0	0	0	CTRL48-sgFUSION11
ctrl2	296	58	abb	4	0	0	0				1.3		0	0	0	0	0	0	0	CTRL48-sgFUSION11
ctrl2	296	58	baa	4	0	0	0				0.5		0	0	0	0	0	0	0	CTRL48-sgFUSION11
ctrl2	296	58	bab	4	0	0	0				0.5		0	0	0	0	0	0	0	CTRL48-sgFUSION11
ctrl2	296	58	bba	4	0	0	0				3		0	0	0	0	0	0	0	CTRL48-sgFUSION11
ctrl2	296	58	bbb	4	0	0	0				3		0	0	0	0	0	0	0	CTRL48-sgFUSION11
ctrl5	537	1	o	N	1	0	0				14	20	0	0	0	0	0	0	0	CTRL48-mCit
ctrl5	537	1	a	N+1	0	0	0				78.6667		0	0	0	0	0	0	0	CTRL48-mCit
ctrl5	537	1	b	N+1	1	0	0				18	40	0	0	0	0	0	0	0	CTRL48-mCit
ctrl5	537	1	ba	N+2	1	0	0				23	60	0	0	0	0	0	0	0	CTRL48-mCit
ctrl5	537	1	bb	N+2	0	0	0				60		0	0	0	0	0	0	0	CTRL48-mCit
ctrl5	537	1	baa	N+3	0	0	0				36		0	0	0	0	0	0	0	CTRL48-mCit
ctrl5	537	1	bab	N+3	0	0	0				36		0	0	0	0	0	0	0	CTRL48-mCit
ctrl5	538	2	o	N	1	0	0				10.3333	40	0	0	0	0	0	0	0	CTRL48-mCit
ctrl5	538	2	a	N+1	1	0	0				21.3333	60	0	0	0	0	0	0	0	CTRL48-mCit
ctrl5	538	2	b	N+1	0	0	0				82		0	0	0	0	0	0	0	CTRL48-mCit
ctrl5	538	2	aa	N+2	1	0	0				22	120	0	0	0	0	0	0	0	CTRL48-mCit
ctrl5	538	2	ab	N+2	1	0	0				21	80	0	0	0	0	0	0	0	CTRL48-mCit
ctrl5	538	2	aaa	N+3	1	0	0				25.3333	140	0	0	0	0	0	0	0	CTRL48-mCit
ctrl5	538	2	aab	N+3	0	0	0				35.6667		0	0	0	0	0	0	0	CTRL48-mCit
ctrl5	538	2	aba	N+4	0	0	0				37.3333		0	0	0	0	0	0	0	CTRL48-mCit
ctrl5	538	2	abb	N+4	0	0	0				37.3333		0	0	0	0	0	0	0	CTRL48-mCit
ctrl5	538	2	aaaa	N+4	0	0	0				8		0	0	0	0	0	0	0	CTRL48-mCit
ctrl5	538	2	aaab	N+4	0	0	0				8		1	0	0	0	0	0	0	CTRL48-mCit
ctrl5	539	3	o	N	0	0	0				93		1	0	0	0	0	0	0	CTRL48-mCit
ctrl5	540	4	o	N	1	0	0				10.6667	40	0	0	0	0	0	0	0	CTRL48-mCit
ctrl5	540	4	a	N+1	1	0	0				21	20	0	0	0	0	0	0	0	CTRL48-mCit
ctrl5	540	4	b	N+1	0	0	0				81.6667		0	0	0	0	0	0	0	CTRL48-mCit
ctrl5	540	4	aa	N+2	1	0	0				23.6667	40	0	0	0	0	0	0	0	CTRL48-mCit
ctrl5	540	4	ab	N+2	1	0	0				23.6667	40	0	0	0	0	0	0	0	CTRL48-mCit
ctrl5	540	4	aaa	N+3	1	0	0				22	40	0	0	0	0	0	0	0	CTRL48-mCit
ctrl5	540	4	aab	N+3	1	0	0				31	40	0	0	0	0	0	0	0	CTRL48-mCit
ctrl5	540	4	aba	N+3	0	0	0				36		1	0	0	0	0	0	0	CTRL48-mCit
ctrl5	540	4	abb	N+3	0	0	0				36		0	0	0	0	0	0	0	CTRL48-mCit
ctrl5	540	4	aaaa	N+4	0	0	0				13.3333		0	0	0	0	0	0	0	CTRL48-mCit
ctrl5	540	4	aaab	N+4	0	0	0				13.3333		0	0	0	0	0	0	0	CTRL48-mCit
ctrl5	540	4	aaba	N+4	0	0	0				4.33333		0	0	0	0	0	0	0	CTRL48-mCit
ctrl5	540	4	aabb	N+4	0	0	0				4.33333		0	0	0	0	0	0	0	CTRL48-mCit
ctrl5	541	5	o	N	1	0	0				10.3333	40	0	0	0	0	0	0	0	CTRL48-mCit
ctrl5	541	5	a	N+1	1	0	0				18	20	0	0	0	0	0	0	0	CTRL48-mCit
ctrl5	541	5	b	N+1	1	0	0				20	40	0	0	0	0	0	0	0	CTRL48-mCit
ctrl5	541	5	aa	N+2	1	0	0				20.6667	40	0	0	0	0	0	0	0	CTRL48-mCit
ctrl5	541	5	ab	N+2	1	0	0				21	40	0	0	0	0	0	0	0	CTRL48-mCit
ctrl5	541	5	ba	N+2	1	0	0				24.3333	20	0	0	0	0	0	0	0	CTRL48-mCit
ctrl5	541	5	bb	N+2	1	0	0				22	40	0	0	0	0	0	0	0	CTRL48-mCit
ctrl5	541	5	aaa	N+3	1	0	0				26	20	0	0	0	0	0	0	0	CTRL48-mCit
ctrl5	541	5	aab	N+3	1	0	0				28	40	0	0	0	0	0	0	0	CTRL48-mCit
ctrl5	541	5	aba	N+3	1	0	0				23.3333	40	0	0	0	0	0	0	0	CTRL48-mCit
ctrl5	541	5	abb	N+3	1	0	0				20.6667	60	0	0	0	0	0	0	0	CTRL48-mCit
ctrl5	541	5	baa	N+3	1	0	0				24.3333	40	0	0	0	0	0	0	0	CTRL48-mCit
ctrl5	541	5	bab	N+3	1	0	0				31	40	0	0	0	0	0	0	0	CTRL48-mCit
ctrl5	541	5	bba	N+3	1	0	0				27.6667	40	0	0	0	0	0	0	0	CTRL48-mCit
ctrl5	541	5	bbb	N+3	1	0	0				23.3333	40	0	0	0	0	0	0	0	CTRL48-mCit
ctrl5	541	5	aaaa	N+4	0	0	0				16		0	0	0	0	0	0	0	CTRL48-mCit
ctrl5	541	5	aaab	N+4	0	0	0				16		0	0	0	0	0	0	0	CTRL48-mCit
ctrl5	541	5	aaba	N+4	0	0	0				13.6667		0	0	0	0	0	0	0	CTRL48-mCit
ctrl5	541	5	aabb	N+4	0	0	0				13.6667		0	0	0	0	0	0	0	CTRL48-mCit
ctrl5	541	5	abaa	N+4	0	0	0				18		0	0	0	0	0	0	0	CTRL48-mCit
ctrl5	541	5	abab	N+4	0	0	0				18		0	0	0	0	0	0	0	CTRL48-mCit
ctrl5	541	5	abba	N+4	0	0	0				20.3333		0	0	0	0	0	0	0	CTRL48-mCit
ctrl5	541	5	abbb	N+4	0	0	0				20.3333		0	0	0	0	0	0	0	CTRL48-mCit
ctrl5	541	5	baaa	N+4	0	0	0				11.6667		0	0	0	0	0	0	0	CTRL48-mCit
ctrl5	541	5	baab	N+4	0	0	0				11.6667		0	0	0	0	0	0	0	CTRL48-mCit
ctrl5	541	5	baba	N+4	0	0	0				5		0	0	0	0	0	0	0	CTRL48-mCit
ctrl5	541	5	babb	N+4	0	0	0				5		0	0	0	0	0	0	0	CTRL48-mCit
ctrl5	541	5	bbaa	N+4	0	0	0				10.3333		0	0	0	0	0	0	0	CTRL48-mCit
ctrl5	541	5	bbab	N+4	0	0	0				10.3333		0	0	0	0	0	0	0	CTRL48-mCit
ctrl5	541	5	bbba	N+4	0	0	0				14.6667		0	0	0	0	0	0	0	CTRL48-mCit
ctrl5	541	5	bbbb	N+4	0	0	0				14.6667		0	0	0	0	0	0	0	CTRL48-mCit
ctrl5	542	6	o	N	1	0	0				2.66667	40	0	0	0	0	0	0	0	CTRL48-mCit
ctrl5	542	6	a	N+1	1	0	0				14.3333	40	0	0	0	0	0	0	0	CTRL48-mCit
ctrl5	542	6	b	N+1	1	0	0				17.3333	40	0	0	0	0	0	0	0	CTRL48-mCit
ctrl5	542	6	aa	N+2	1	0	0				13.3333	20	0	0	0	0	0	0	0	CTRL48-mCit
ctrl5	542	6	ab	N+2	1	0	0				17	40	0	0	0	0	0	0	0	CTRL48-mCit
ctrl5	542	6	ba	N+2	1	0	0				16.3333	20	0	0	0	0	0	0	0	CTRL48-mCit
ctrl5	542	6	bb	N+2	1	0	0				17	20	0	0	0	0	0	0	0	CTRL48-mCit
ctrl5	542	6	aaa	N+3	1	0	0				16.6667	20	0	0	0	0	0	0	0	CTRL48-mCit
ctrl5	542	6	aab	N+3	1	0	0				15.6667	20	0	0	0	0	0	0	0	CTRL48-mCit
ctrl5	542	6	aba	N+3	1	0	0				15.6667	20	0	0	0	0	0	0	0	CTRL48-mCit
ctrl5	542	6	abb	N+3	1	0	0				15.6667	40	0	0	0	0	0	0	0	CTRL48-mCit
ctrl5	542	6	baa	N+3	1	0	0				20.3333	60	0	0	0	0	0	0	0	CTRL48-mCit
ctrl5	542	6	bab	N+3	1	0	0				18	40	0	0	0	0	0	0	0	CTRL48-mCit
ctrl5	542	6	bba	N+3	1	0	0				19	40	0	0	0	0	0	0	0	CTRL48-mCit
ctrl5	542	6	bbb	N+3	1	0	0				17.6667	20	0	0	0	0	0	0	0	CTRL48-mCit
ctrl5	542	6	aaaa	N+4	1	0	0				18.6667	60	0	0	0	0	0	0	0	CTRL48-mCit
ctrl5	542	6	aaab	N+4	1	0	0				18.6667	20	0	0	0	0	0	0	0	CTRL48-mCit
ctrl5	542	6	aaba	N+4	1	0	0				17.3333	20	0	0	0	0	0	0	0	CTRL48-mCit
ctrl5	542	6	aabb	N+4	1	0	0				19.3333	20	0	0	0	0	0	0	0	CTRL48-mCit
ctrl5	542	6	abaa	N+4	1	0	0				17.3333	40	0	0	0	0	0	0	0	CTRL48-mCit
ctrl5	542	6	abab	N+4	1	0	0				17.6667	40	0	0	0	0	0	0	0	CTRL48-mCit
ctrl5	542	6	abba	N+4	1	0	0				16.6667	40	0	0	0	0	0	0	0	CTRL48-mCit
ctrl5	542	6	abbb	N+4	1	0	0				17.3333	40	0	0	0	0	0	0	0	CTRL48-mCit
ctrl5	542	6	baaa	N+4	1	0	0				19.6667	40	0	0	0	0	0	0	0	CTRL48-mCit
ctrl5	542	6	baab	N+4	1	0	0				17.6667	40	0	0	0	0	0	0	0	CTRL48-mCit
ctrl5	542	6	baba	N+4	1	0	0				17	40	0	0	0	0	0	0	0	CTRL48-mCit
ctrl5	542	6	babb	N+4	1	0	0				19	20	0	0	0	0	0	0	0	CTRL48-mCit
ctrl5	542	6	bbaa	N+4	1	0	0				19	20	0	0	0	0	0	0	0	CTRL48-mCit
ctrl5	542	6	bbab	N+4	1	0	0				19.6667	40	0	0	0	0	0	0	0	CTRL48-mCit
ctrl5	542	6	bbba	N+4	1	0	0				20	20	0	0	0	0	0	0	0	CTRL48-mCit
ctrl5	542	6	bbbb	N+4	1	0	0				19.3333	40	0	0	0	0	0	0	0	CTRL48-mCit
ctrl5	542	6	aaaaa	N+5	1	0	0				18	40	0	0	0	0	0	0	0	CTRL48-mCit
ctrl5	542	6	aaaab	N+5	1	0	0				17	40	0	0	0	0	0	0	0	CTRL48-mCit
ctrl5	542	6	aaaba	N+5	1	0	0				20.6667	20	0	0	0	0	0	0	0	CTRL48-mCit
ctrl5	542	6	aaabb	N+5	1	0	0				20.6667	40	0	0	0	0	0	0	0	CTRL48-mCit
ctrl5	542	6	aabaa	N+5	1	0	0				20.3333	40	0	0	0	0	0	0	0	CTRL48-mCit
ctrl5	542	6	aabab	N+5	1	0	0				20	40	0	0	0	0	0	0	0	CTRL48-mCit
ctrl5	542	6	aabba	N+5	1	0	0				18.3333	40	0	0	0	0	0	0	0	CTRL48-mCit
ctrl5	542	6	aabbb	N+5	1	0	0				19.6667	80	0	0	0	0	0	0	0	CTRL48-mCit
ctrl5	542	6	abaaa	N+5	1	0	0				17	20	0	0	0	0	0	0	0	CTRL48-mCit
ctrl5	542	6	abaab	N+5	1	0	0				16.3333	40	0	0	0	0	0	0	0	CTRL48-mCit
ctrl5	542	6	ababa	N+5	1	0	0				15.6667	40	0	0	0	0	0	0	0	CTRL48-mCit
ctrl5	542	6	ababb	N+5	1	0	0				15.3333	40	0	0	0	0	0	0	0	CTRL48-mCit
ctrl5	542	6	abbaa	N+5	1	0	0				19.6667	20	0	0	0	0	0	0	0	CTRL48-mCit
ctrl5	542	6	abbab	N+5	1	0	0				17	20	0	0	0	0	0	0	0	CTRL48-mCit
ctrl5	542	6	abbba	N+5	1	0	0				15.6667	40	0	0	0	0	0	0	0	CTRL48-mCit
ctrl5	542	6	abbbb	N+5	1	0	0				15.3333	40	0	0	0	0	0	0	0	CTRL48-mCit
ctrl5	542	6	baaaa	N+5	0	0	0				14.6667		0	0	0	0	0	0	0	CTRL48-mCit
ctrl5	542	6	baaab	N+5	0	0	0				14.6667		0	0	0	0	0	0	0	CTRL48-mCit
ctrl5	542	6	baaba	N+5	0	0	0				16.6667		0	0	0	0	0	0	0	CTRL48-mCit
ctrl5	542	6	baabb	N+5	0	0	0				16.6667		0	0	0	0	0	0	0	CTRL48-mCit
ctrl5	542	6	babaa	N+5	1	0	0				18	40	0	0	0	0	0	0	0	CTRL48-mCit
ctrl5	542	6	babab	N+5	1	0	0				17	40	0	0	0	0	0	0	0	CTRL48-mCit
ctrl5	542	6	babba	N+5	0	0	0				17		0	0	0	0	0	0	0	CTRL48-mCit
ctrl5	542	6	babbb	N+5	0	0	0				17		0	0	0	0	0	0	0	CTRL48-mCit
ctrl5	542	6	bbaaa	N+5	0	0	0				16.6667		0	0	0	0	0	0	0	CTRL48-mCit
ctrl5	542	6	bbaab	N+5	0	0	0				16.6667		0	0	0	0	0	0	0	CTRL48-mCit
ctrl5	542	6	bbaba	N+5	0	0	0				15.6667		0	0	0	0	0	0	0	CTRL48-mCit
ctrl5	542	6	bbabb	N+5	0	0	0				15.6667		0	0	0	0	0	0	0	CTRL48-mCit
ctrl5	542	6	bbbaa	N+5	0	0	0				16		0	0	0	0	0	0	0	CTRL48-mCit
ctrl5	542	6	bbbab	N+5	0	0	0				16		0	0	0	0	0	0	0	CTRL48-mCit
ctrl5	542	6	bbbba	N+5	0	0	0				17.6667		0	0	0	0	0	0	0	CTRL48-mCit
ctrl5	542	6	bbbbb	N+5	0	0	0				17.6667		0	0	0	0	0	0	0	CTRL48-mCit
ctrl5	542	6	aaaaaa	N+6	0	0	0				5.66667		0	0	0	0	0	0	0	CTRL48-mCit
ctrl5	542	6	aaaaab	N+6	0	0	0				5.66667		0	0	0	0	0	0	0	CTRL48-mCit
ctrl5	542	6	aaaaba	N+6	0	0	0				6.66667		0	0	0	0	0	0	0	CTRL48-mCit
ctrl5	542	6	aaaabb	N+6	0	0	0				6.66667		0	0	0	0	0	0	0	CTRL48-mCit
ctrl5	542	6	aaabaa	N+6	0	0	0				4		0	0	0	0	0	0	0	CTRL48-mCit
ctrl5	542	6	aaabab	N+6	0	0	0				4		0	0	0	0	0	0	0	CTRL48-mCit
ctrl5	542	6	aaabba	N+6	0	0	0				3.66667		0	0	0	0	0	0	0	CTRL48-mCit
ctrl5	542	6	aaabbb	N+6	0	0	0				3.66667		0	0	0	0	0	0	0	CTRL48-mCit
ctrl5	542	6	aabaaa	N+6	0	0	0				6.33333		0	0	0	0	0	0	0	CTRL48-mCit
ctrl5	542	6	aabaab	N+6	0	0	0				6.33333		0	0	0	0	0	0	0	CTRL48-mCit
ctrl5	542	6	aababa	N+6	0	0	0				6.66667		0	0	0	0	0	0	0	CTRL48-mCit
ctrl5	542	6	aababb	N+6	0	0	0				6.66667		0	0	0	0	0	0	0	CTRL48-mCit
ctrl5	542	6	aabbaa	N+6	0	0	0				6.33333		0	0	0	0	0	0	0	CTRL48-mCit
ctrl5	542	6	aabbab	N+6	0	0	0				6.33333		0	0	0	0	0	0	0	CTRL48-mCit
ctrl5	542	6	aabbba	N+6	0	0	0				4.33333		0	0	0	0	0	0	0	CTRL48-mCit
ctrl5	542	6	aabbbb	N+6	0	0	0				4.33333		0	0	0	0	0	0	0	CTRL48-mCit
ctrl5	542	6	abaaaa	N+6	0	0	0				5.66667		0	0	0	0	0	0	0	CTRL48-mCit
ctrl5	542	6	abaaab	N+6	0	0	0				5.66667		0	0	0	0	0	0	0	CTRL48-mCit
ctrl5	542	6	abaaba	N+6	0	0	0				6		0	0	0	0	0	0	0	CTRL48-mCit
ctrl5	542	6	abaabb	N+6	0	0	0				6		0	0	0	0	0	0	0	CTRL48-mCit
ctrl5	542	6	ababaa	N+6	0	0	0				6.33333		0	0	0	0	0	0	0	CTRL48-mCit
ctrl5	542	6	ababab	N+6	0	0	0				6.33333		0	0	0	0	0	0	0	CTRL48-mCit
ctrl5	542	6	ababba	N+6	0	0	0				6.66667		0	0	0	0	0	0	0	CTRL48-mCit
ctrl5	542	6	ababbb	N+6	0	0	0				6.66667		0	0	0	0	0	0	0	CTRL48-mCit
ctrl5	542	6	abbaaa	N+6	0	0	0				3.33333		0	0	0	0	0	0	0	CTRL48-mCit
ctrl5	542	6	abbaab	N+6	0	0	0				3.33333		0	0	0	0	0	0	0	CTRL48-mCit
ctrl5	542	6	abbaba	N+6	0	0	0				6		0	0	0	0	0	0	0	CTRL48-mCit
ctrl5	542	6	abbabb	N+6	0	0	0				6		0	0	0	0	0	0	0	CTRL48-mCit
ctrl5	542	6	abbbaa	N+6	0	0	0				6.33333		0	0	0	0	0	0	0	CTRL48-mCit
ctrl5	542	6	abbbab	N+6	0	0	0				6.33333		0	0	0	0	0	0	0	CTRL48-mCit
ctrl5	542	6	abbbba	N+6	0	0	0				6.66667		0	0	0	0	0	0	0	CTRL48-mCit
ctrl5	542	6	abbbbb	N+6	0	0	0				6.66667		0	0	0	0	0	0	0	CTRL48-mCit
ctrl5	542	6	babaaa	N+6	0	0	0				0		0	0	0	0	0	0	0	CTRL48-mCit
ctrl5	542	6	babaab	N+6	0	0	0				0		0	0	0	0	0	0	0	CTRL48-mCit
ctrl5	542	6	bababa	N+6	0	0	0				1		0	0	0	0	0	0	0	CTRL48-mCit
ctrl5	542	6	bababb	N+6	0	0	0				1		0	0	0	0	0	0	0	CTRL48-mCit
ctrl5	543	7	o	N	0	0	0				93		0	0	0	0	0	0	0	CTRL48-mCit
ctrl5	544	8	o	N	1	0	0				4.66667	40	0	0	0	0	0	0	0	CTRL48-mCit
ctrl5	544	8	a	N+1	1	0	0				16	20	0	0	0	0	0	0	0	CTRL48-mCit
ctrl5	544	8	b	N+1	1	0	0				17	40	0	0	0	0	0	0	0	CTRL48-mCit
ctrl5	544	8	aa	N+2	1	0	0				18.3333	20	0	0	0	0	0	0	0	CTRL48-mCit
ctrl5	544	8	ab	N+2	1	0	0				19.3333	40	0	0	0	0	0	0	0	CTRL48-mCit
ctrl5	544	8	ba	N+2	1	0	0				15.3333	40	0	0	0	0	0	0	0	CTRL48-mCit
ctrl5	544	8	bb	N+2	1	0	0				17	20	0	0	0	0	0	0	0	CTRL48-mCit
ctrl5	544	8	aaa	N+3	1	0	0				18	40	0	0	0	0	0	0	0	CTRL48-mCit
ctrl5	544	8	aab	N+3	1	0	0				20.6667	20	0	0	0	0	0	0	0	CTRL48-mCit
ctrl5	544	8	aba	N+3	1	0	0				18.3333	20	0	0	0	0	0	0	0	CTRL48-mCit
ctrl5	544	8	abb	N+3	1	0	0				19.3333	40	0	0	0	0	0	0	0	CTRL48-mCit
ctrl5	544	8	baa	N+3	1	0	0				19.3333	40	0	0	0	0	0	0	0	CTRL48-mCit
ctrl5	544	8	bab	N+3	1	0	0				22.3333	20	0	0	0	0	0	0	0	CTRL48-mCit
ctrl5	544	8	bba	N+3	1	0	0				20.6667	40	0	0	0	0	0	0	0	CTRL48-mCit
ctrl5	544	8	bbb	N+3	1	0	0				20.6667	40	0	0	0	0	0	0	0	CTRL48-mCit
ctrl5	544	8	aaaa	N+4	1	0	0				19.3333	40	0	0	0	0	0	0	0	CTRL48-mCit
ctrl5	544	8	aaab	N+4	1	0	0				22.6667	20	0	0	0	0	0	0	0	CTRL48-mCit
ctrl5	544	8	aaba	N+4	1	0	0				16	40	0	0	0	0	0	0	0	CTRL48-mCit
ctrl5	544	8	aabb	N+4	1	0	0				19	60	0	0	0	0	0	0	0	CTRL48-mCit
ctrl5	544	8	abaa	N+4	1	0	0				17.3333	20	0	0	0	0	0	0	0	CTRL48-mCit
ctrl5	544	8	abab	N+4	1	0	0				20	40	0	0	0	0	0	0	0	CTRL48-mCit
ctrl5	544	8	abba	N+4	1	0	0				16.3333	20	0	0	0	0	0	0	0	CTRL48-mCit
ctrl5	544	8	abbb	N+4	1	0	0				18.6667	20	0	0	0	0	0	0	0	CTRL48-mCit
ctrl5	544	8	baaa	N+4	1	0	0				22.3333	60	0	0	0	0	0	0	0	CTRL48-mCit
ctrl5	544	8	baab	N+4	1	0	0				22.3333	20	0	0	0	0	0	0	0	CTRL48-mCit
ctrl5	544	8	baba	N+4	1	0	0				18.6667	40	0	0	0	0	0	0	0	CTRL48-mCit
ctrl5	544	8	babb	N+4	1	0	0				19.3333	40	0	0	0	0	0	0	0	CTRL48-mCit
ctrl5	544	8	bbaa	N+4	1	0	0				18.6667	40	0	0	0	0	0	0	0	CTRL48-mCit
ctrl5	544	8	bbab	N+4	1	0	0				20	60	0	0	0	0	0	0	0	CTRL48-mCit
ctrl5	544	8	bbba	N+4	1	0	0				18.6667	40	0	0	0	0	0	0	0	CTRL48-mCit
ctrl5	544	8	bbbb	N+4	1	0	0				22.3333	40	0	0	0	0	0	0	0	CTRL48-mCit
ctrl5	544	8	aaaaa	N+5	0	0	0				14		0	0	0	0	0	0	0	CTRL48-mCit
ctrl5	544	8	aaaab	N+5	0	0	0				14		0	0	0	0	0	0	0	CTRL48-mCit
ctrl5	544	8	aaaba	N+5	0	0	0				11		0	0	0	0	0	0	0	CTRL48-mCit
ctrl5	544	8	aaabb	N+5	0	0	0				11		0	0	0	0	0	0	0	CTRL48-mCit
ctrl5	544	8	aabaa	N+5	0	0	0				15		0	0	0	0	0	0	0	CTRL48-mCit
ctrl5	544	8	aabab	N+5	0	0	0				15		0	0	0	0	0	0	0	CTRL48-mCit
ctrl5	544	8	aabba	N+5	0	0	0				12.3333		0	0	0	0	0	0	0	CTRL48-mCit
ctrl5	544	8	aabbb	N+5	0	0	0				12.3333		0	0	0	0	0	0	0	CTRL48-mCit
ctrl5	544	8	abaaa	N+5	0	0	0				15		0	0	0	0	0	0	0	CTRL48-mCit
ctrl5	544	8	abaab	N+5	0	0	0				15		0	0	0	0	0	0	0	CTRL48-mCit
ctrl5	544	8	ababa	N+5	0	0	0				12		0	0	0	0	0	0	0	CTRL48-mCit
ctrl5	544	8	ababb	N+5	0	0	0				12		0	0	0	0	0	0	0	CTRL48-mCit
ctrl5	544	8	abbaa	N+5	0	0	0				15.3333		0	0	0	0	0	0	0	CTRL48-mCit
ctrl5	544	8	abbab	N+5	0	0	0				15.3333		0	0	0	0	0	0	0	CTRL48-mCit
ctrl5	544	8	abbba	N+5	0	0	0				13.6667		0	0	0	0	0	0	0	CTRL48-mCit
ctrl5	544	8	aaaaa	N+5	0	0	0				9.66667		0	0	0	0	0	0	0	CTRL48-mCit
ctrl5	544	8	baaaa	N+5	0	0	0				11.3333		0	0	0	0	0	0	0	CTRL48-mCit
ctrl5	544	8	baaab	N+5	0	0	0				11.3333		0	0	0	0	0	0	0	CTRL48-mCit
ctrl5	544	8	baaba	N+5	0	0	0				12.6667		0	0	0	0	0	0	0	CTRL48-mCit
ctrl5	544	8	baabb	N+5	0	0	0				12.6667		0	0	0	0	0	0	0	CTRL48-mCit
ctrl5	544	8	babaa	N+5	0	0	0				12		0	0	0	0	0	0	0	CTRL48-mCit
ctrl5	544	8	babab	N+5	0	0	0				12		0	0	0	0	0	0	0	CTRL48-mCit
ctrl5	544	8	babba	N+5	0	0	0				12.6667		0	0	0	0	0	0	0	CTRL48-mCit
ctrl5	544	8	babbb	N+5	0	0	0				12.6667		0	0	0	0	0	0	0	CTRL48-mCit
ctrl5	544	8	bbaaa	N+5	0	0	0				12		0	0	0	0	0	0	0	CTRL48-mCit
ctrl5	544	8	bbaab	N+5	0	0	0				12		0	0	0	0	0	0	0	CTRL48-mCit
ctrl5	544	8	bbaba	N+5	0	0	0				11.6667		0	0	0	0	0	0	0	CTRL48-mCit
ctrl5	544	8	bbabb	N+5	0	0	0				11.6667		0	0	0	0	0	0	0	CTRL48-mCit
ctrl5	544	8	bbbaa	N+5	0	0	0				12		0	0	0	0	0	0	0	CTRL48-mCit
ctrl5	544	8	bbbab	N+5	0	0	0				12		0	0	0	0	0	0	0	CTRL48-mCit
ctrl5	544	8	bbbba	N+5	0	0	0				9.66667		0	0	0	0	0	0	0	CTRL48-mCit
ctrl5	544	8	bbbbb	N+5	0	0	0				9.66667		0	0	0	0	0	0	0	CTRL48-mCit
ctrl5	545	9	o	N	1	0	0				8	60	0	0	0	0	0	0	0	CTRL48-mCit
ctrl5	545	9	a	N+1	1	0	0				16.6667	40	0	0	0	0	0	0	0	CTRL48-mCit
ctrl5	545	9	b	N+1	1	0	0				18.3333	20	0	0	0	0	0	0	0	CTRL48-mCit
ctrl5	545	9	aa	N+2	0	0	0				66.6667		0	0	0	0	0	0	0	CTRL48-mCit
ctrl5	545	9	ab	N+2	1	0	0				20.3333	60	0	0	0	0	0	0	0	CTRL48-mCit
ctrl5	545	9	ba	N+2	0	0	0				65.3333		0	0	0	0	0	0	0	CTRL48-mCit
ctrl5	545	9	bb	N+2	0	0	0				65.3333		0	0	0	0	0	0	0	CTRL48-mCit
ctrl5	545	9	aba	N+3	1	0	0				26.3333	20	0	0	0	0	0	0	0	CTRL48-mCit
ctrl5	545	9	abb	N+3	0	0	0				45.3333		0	0	0	0	0	0	0	CTRL48-mCit
ctrl5	545	9	abaa	N+4	0	0	0				18.6667		0	0	0	0	0	0	0	CTRL48-mCit
ctrl5	545	9	abab	N+4	0	0	0				18.6667		0	0	0	0	0	0	0	CTRL48-mCit
ctrl5	546	10	o	N	1	0	0				7.33333	40	0	0	0	0	0	0	0	CTRL48-mCit
ctrl5	546	10	a	N+1	1	0	0				22	20	0	0	0	0	0	0	0	CTRL48-mCit
ctrl5	546	10	b	N+1	1	0	0				22.3333	20	0	0	0	0	0	0	0	CTRL48-mCit
ctrl5	546	10	aa	N+2	1	0	0				21.3333	20	0	0	0	0	0	0	0	CTRL48-mCit
ctrl5	546	10	ab	N+2	1	0	0				21	20	0	0	0	0	0	0	0	CTRL48-mCit
ctrl5	546	10	ba	N+2	0	0	0				62.3333		0	0	0	0	0	0	0	CTRL48-mCit
ctrl5	546	10	bb	N+2	1	0	0				17.6667	20	0	0	0	0	0	0	0	CTRL48-mCit
ctrl5	546	10	aaa	N+3	1	0	0				27.3333	20	0	0	0	0	0	0	0	CTRL48-mCit
ctrl5	546	10	aab	N+3	1	0	0				31.3333	20	0	0	0	0	0	0	0	CTRL48-mCit
ctrl5	546	10	aba	N+3	1	0	0				28	40	0	0	0	0	0	0	0	CTRL48-mCit
ctrl5	546	10	abb	N+3	0	0	0				41.3333		0	0	0	0	0	0	0	CTRL48-mCit
ctrl5	546	10	bba	N+3	0	1	0				16		0	0	0	0	0	0	0	CTRL48-mCit
ctrl5	546	10	bbb	N+3	0	1	0				18		0	0	0	0	0	0	0	CTRL48-mCit
ctrl5	546	10	aaaa	N+4	0	0	0				13.3333		0	0	0	0	0	0	0	CTRL48-mCit
ctrl5	546	10	aaab	N+4	0	0	0				13.3333		0	0	0	0	0	0	0	CTRL48-mCit
ctrl5	546	10	aaba	N+4	0	0	0				9.33333		0	0	0	0	0	0	0	CTRL48-mCit
ctrl5	546	10	aabb	N+4	0	0	0				9.33333		0	0	0	0	0	0	0	CTRL48-mCit
ctrl5	546	10	abaa	N+4	0	0	0				12.6667		0	0	0	0	0	0	0	CTRL48-mCit
ctrl5	546	10	abab	N+4	0	0	0				12.6667		0	0	0	0	0	0	0	CTRL48-mCit
ctrl5	547	11	o	N	1	0	0				4	20	0	0	0	0	0	0	0	CTRL48-mCit
ctrl5	547	11	a	N+1	1	0	0				16.3333	40	0	0	0	0	0	0	0	CTRL48-mCit
ctrl5	547	11	b	N+1	1	0	0				15.3333	20	0	0	0	0	0	0	0	CTRL48-mCit
ctrl5	547	11	aa	N+2	1	0	0				22	40	0	0	0	0	0	0	0	CTRL48-mCit
ctrl5	547	11	ab	N+2	1	0	0				17.3333	40	0	0	0	0	0	0	0	CTRL48-mCit
ctrl5	547	11	ba	N+2	1	0	0				18	40	0	0	0	0	0	0	0	CTRL48-mCit
ctrl5	547	11	bb	N+2	1	0	0				22.3333	20	0	0	0	0	0	0	0	CTRL48-mCit
ctrl5	547	11	aaa	N+3	1	0	0				21	20	0	0	0	0	0	0	0	CTRL48-mCit
ctrl5	547	11	aab	N+3	1	0	0				21.6667	20	0	0	0	0	0	0	0	CTRL48-mCit
ctrl5	547	11	aba	N+3	1	0	0				16.3333	20	0	0	0	0	0	0	0	CTRL48-mCit
ctrl5	547	11	abb	N+3	1	0	0				18.3333	40	0	0	0	0	0	0	0	CTRL48-mCit
ctrl5	547	11	baa	N+3	1	0	0				20	40	0	0	0	0	0	0	0	CTRL48-mCit
ctrl5	547	11	bab	N+3	1	0	0				21.3333	20	0	0	0	0	0	0	0	CTRL48-mCit
ctrl5	547	11	bba	N+3	1	0	0				22	20	0	0	0	0	0	0	0	CTRL48-mCit
ctrl5	547	11	bbb	N+3	1	0	0				23.6667	20	0	0	0	0	0	0	0	CTRL48-mCit
ctrl5	547	11	aaaa	N+4	1	0	0				23.3333	40	0	0	0	0	0	0	0	CTRL48-mCit
ctrl5	547	11	aaab	N+4	1	0	0				23.6667	40	0	0	0	0	0	0	0	CTRL48-mCit
ctrl5	547	11	aaba	N+4	1	0	0				21	40	0	0	0	0	0	0	0	CTRL48-mCit
ctrl5	547	11	aabb	N+4	1	0	0				23.6667	20	0	0	0	0	0	0	0	CTRL48-mCit
ctrl5	547	11	abaa	N+4	0	1	0				21		0	0	0	0	0	0	0	CTRL48-mCit
ctrl5	547	11	abab	N+4	1	0	0				20.6667	20	0	0	0	0	0	0	0	CTRL48-mCit
ctrl5	547	11	abba	N+4	1	0	0				17.6667	40	0	0	0	0	0	0	0	CTRL48-mCit
ctrl5	547	11	abbb	N+4	1	0	0				18.3333	20	0	0	0	0	0	0	0	CTRL48-mCit
ctrl5	547	11	baaa	N+4	1	0	0				18.3333	20	0	0	0	0	0	0	0	CTRL48-mCit
ctrl5	547	11	baab	N+4	1	0	0				20.6667	20	0	0	0	0	0	0	0	CTRL48-mCit
ctrl5	547	11	baba	N+4	1	0	0				20	40	0	0	0	0	0	0	0	CTRL48-mCit
ctrl5	547	11	babb	N+4	1	0	0				25.6667	40	0	0	0	0	0	0	0	CTRL48-mCit
ctrl5	547	11	bbaa	N+4	1	0	0				20	20	0	0	0	0	0	0	0	CTRL48-mCit
ctrl5	547	11	bbab	N+4	1	0	0				20	20	0	0	0	0	0	0	0	CTRL48-mCit
ctrl5	547	11	bbba	N+4	1	0	0				24	20	0	0	0	0	0	0	0	CTRL48-mCit
ctrl5	547	11	bbbb	N+4	1	0	0				21	20	0	0	0	0	0	0	0	CTRL48-mCit
ctrl5	547	11	aaaaa	N+5	0	0	0				4.33333		0	0	0	0	0	0	0	CTRL48-mCit
ctrl5	547	11	aaaab	N+5	0	0	0				4.33333		0	0	0	0	0	0	0	CTRL48-mCit
ctrl5	547	11	aaaba	N+5	0	0	0				4.66667		0	0	0	0	0	0	0	CTRL48-mCit
ctrl5	547	11	aaabb	N+5	0	0	0				4.66667		0	0	0	0	0	0	0	CTRL48-mCit
ctrl5	547	11	aabaa	N+5	0	0	0				6.66667		0	0	0	0	0	0	0	CTRL48-mCit
ctrl5	547	11	aabab	N+5	0	0	0				6.66667		0	0	0	0	0	0	0	CTRL48-mCit
ctrl5	547	11	aabba	N+5	0	0	0				3		0	0	0	0	0	0	0	CTRL48-mCit
ctrl5	547	11	aabbb	N+5	0	0	0				3		0	0	0	0	0	0	0	CTRL48-mCit
ctrl5	547	11	ababa	N+5	0	0	0				16		0	0	0	0	0	0	0	CTRL48-mCit
ctrl5	547	11	ababb	N+5	0	0	0				16		0	0	0	0	0	0	0	CTRL48-mCit
ctrl5	547	11	abbaa	N+5	0	0	0				17.6667		0	0	0	0	0	0	0	CTRL48-mCit
ctrl5	547	11	abbab	N+5	0	0	0				17.6667		0	0	0	0	0	0	0	CTRL48-mCit
ctrl5	547	11	abbba	N+5	0	0	0				16		0	0	0	0	0	0	0	CTRL48-mCit
ctrl5	547	11	abbbb	N+5	0	0	0				16		0	0	0	0	0	0	0	CTRL48-mCit
ctrl5	547	11	baaaa	N+5	0	0	0				15		0	0	0	0	0	0	0	CTRL48-mCit
ctrl5	547	11	baaab	N+5	0	0	0				15		0	0	0	0	0	0	0	CTRL48-mCit
ctrl5	547	11	baaba	N+5	0	0	0				13.3333		0	0	0	0	0	0	0	CTRL48-mCit
ctrl5	547	11	baabb	N+5	0	0	0				13.3333		0	0	0	0	0	0	0	CTRL48-mCit
ctrl5	547	11	babaa	N+5	0	0	0				12		0	0	0	0	0	0	0	CTRL48-mCit
ctrl5	547	11	babab	N+5	0	0	0				12		0	0	0	0	0	0	0	CTRL48-mCit
ctrl5	547	11	babba	N+5	0	0	0				7.66667		0	0	0	0	0	0	0	CTRL48-mCit
ctrl5	547	11	babbb	N+5	0	0	0				7.66667		0	0	0	0	0	0	0	CTRL48-mCit
ctrl5	547	11	bbaaa	N+5	0	0	0				8.33333		0	0	0	0	0	0	0	CTRL48-mCit
ctrl5	547	11	bbaab	N+5	0	0	0				8.33333		0	0	0	0	0	0	0	CTRL48-mCit
ctrl5	547	11	bbaba	N+5	0	0	0				8.33333		0	0	0	0	0	0	0	CTRL48-mCit
ctrl5	547	11	bbabb	N+5	0	0	0				8.33333		0	0	0	0	0	0	0	CTRL48-mCit
ctrl5	547	11	bbbaa	N+5	0	0	0				2		0	0	0	0	0	0	0	CTRL48-mCit
ctrl5	547	11	bbbab	N+5	0	0	0				2		0	0	0	0	0	0	0	CTRL48-mCit
ctrl5	547	11	bbbba	N+5	0	0	0				5		0	0	0	0	0	0	0	CTRL48-mCit
ctrl5	547	11	bbbbb	N+5	0	0	0				5		0	0	0	0	0	0	0	CTRL48-mCit
ctrl5	548	12	o	N	1	0	0				5	40	0	0	0	0	0	0	0	CTRL48-mCit
ctrl5	548	12	a	N+1	1	0	0				18.3333	20	0	0	0	0	0	0	0	CTRL48-mCit
ctrl5	548	12	b	N+1	1	0	0				17.3333	40	0	0	0	0	0	0	0	CTRL48-mCit
ctrl5	548	12	aa	N+2	1	0	0				19	40	0	0	0	0	0	0	0	CTRL48-mCit
ctrl5	548	12	ab	N+2	1	0	0				21.3333	40	0	0	0	0	0	0	0	CTRL48-mCit
ctrl5	548	12	ba	N+2	1	0	0				18	20	0	0	0	0	0	0	0	CTRL48-mCit
ctrl5	548	12	bb	N+2	1	0	0				19.3333	20	0	0	0	0	0	0	0	CTRL48-mCit
ctrl5	548	12	aaa	N+3	1	0	0				16.6667	20	0	0	0	0	0	0	0	CTRL48-mCit
ctrl5	548	12	aab	N+3	1	0	0				17.3333	40	0	0	0	0	0	0	0	CTRL48-mCit
ctrl5	548	12	aba	N+3	1	0	0				18.3333	40	0	0	0	0	0	0	0	CTRL48-mCit
ctrl5	548	12	abb	N+3	1	0	0				19	40	0	0	0	0	0	0	0	CTRL48-mCit
ctrl5	548	12	baa	N+3	1	0	0				18.3333	20	0	0	0	0	0	0	0	CTRL48-mCit
ctrl5	548	12	bab	N+3	1	0	0				18.6667	20	0	0	0	0	0	0	0	CTRL48-mCit
ctrl5	548	12	bba	N+3	1	0	0				18.6667	40	0	0	0	0	0	0	0	CTRL48-mCit
ctrl5	548	12	bbb	N+3	1	0	0				17.6667	20	0	0	0	0	0	0	0	CTRL48-mCit
ctrl5	548	12	aaaa	N+4	1	0	0				21	20	0	0	0	0	0	0	0	CTRL48-mCit
ctrl5	548	12	aaab	N+4	1	0	0				16.6667	20	0	0	0	0	0	0	0	CTRL48-mCit
ctrl5	548	12	aaba	N+4	1	0	0				19.6667	20	0	0	0	0	0	0	0	CTRL48-mCit
ctrl5	548	12	aabb	N+4	1	0	0				19.6667	20	0	0	0	0	0	0	0	CTRL48-mCit
ctrl5	548	12	abaa	N+4	1	0	0				21.6667	20	0	0	0	0	0	0	0	CTRL48-mCit
ctrl5	548	12	abab	N+4	1	0	0				21.6667	20	0	0	0	0	0	0	0	CTRL48-mCit
ctrl5	548	12	abba	N+4	1	0	0				22.3333	40	0	0	0	0	0	0	0	CTRL48-mCit
ctrl5	548	12	abbb	N+4	1	0	0				22.3333	40	0	0	0	0	0	0	0	CTRL48-mCit
ctrl5	548	12	baaa	N+4	1	0	0				20	40	0	0	0	0	0	0	0	CTRL48-mCit
ctrl5	548	12	baab	N+4	1	0	0				18.6667	20	0	0	0	0	0	0	0	CTRL48-mCit
ctrl5	548	12	baba	N+4	1	0	0				18.3333	40	0	0	0	0	0	0	0	CTRL48-mCit
ctrl5	548	12	babb	N+4	1	0	0				20.3333	40	0	0	0	0	0	0	0	CTRL48-mCit
ctrl5	548	12	bbaa	N+4	1	0	0				18.6667	40	0	0	0	0	0	0	0	CTRL48-mCit
ctrl5	548	12	bbab	N+4	1	0	0				16.6667	40	0	0	0	0	0	0	0	CTRL48-mCit
ctrl5	548	12	bbba	N+4	1	0	0				21.6667	40	0	0	0	0	0	0	0	CTRL48-mCit
ctrl5	548	12	bbbb	N+4	1	0	0				19.6667	40	0	0	0	0	0	0	0	CTRL48-mCit
ctrl5	548	12	aaaaa	N+5	0	0	0				11.3333		0	0	0	0	0	0	0	CTRL48-mCit
ctrl5	548	12	aaaab	N+5	0	0	0				11.3333		0	0	0	0	0	0	0	CTRL48-mCit
ctrl5	548	12	aaaba	N+5	0	0	0				15		0	0	0	0	0	0	0	CTRL48-mCit
ctrl5	548	12	aaabb	N+5	0	0	0				15		0	0	0	0	0	0	0	CTRL48-mCit
ctrl5	548	12	aabaa	N+5	0	0	0				11		0	0	0	0	0	0	0	CTRL48-mCit
ctrl5	548	12	aabab	N+5	0	0	0				11		0	0	0	0	0	0	0	CTRL48-mCit
ctrl5	548	12	aabba	N+5	0	0	0				11		0	0	0	0	0	0	0	CTRL48-mCit
ctrl5	548	12	aabbb	N+5	0	0	0				11		0	0	0	0	0	0	0	CTRL48-mCit
ctrl5	548	12	abaaa	N+5	0	0	0				6.33333		0	0	0	0	0	0	0	CTRL48-mCit
ctrl5	548	12	abaab	N+5	0	0	0				6.33333		0	0	0	0	0	0	0	CTRL48-mCit
ctrl5	548	12	ababa	N+5	0	0	0				6.33333		0	0	0	0	0	0	0	CTRL48-mCit
ctrl5	548	12	ababb	N+5	0	0	0				6.33333		0	0	0	0	0	0	0	CTRL48-mCit
ctrl5	548	12	abbaa	N+5	0	0	0				4		0	0	0	0	0	0	0	CTRL48-mCit
ctrl5	548	12	abbab	N+5	0	0	0				4		0	0	0	0	0	0	0	CTRL48-mCit
ctrl5	548	12	abbba	N+5	0	0	0				4		0	0	0	0	0	0	0	CTRL48-mCit
ctrl5	548	12	abbbb	N+5	0	0	0				4		0	0	0	0	0	0	0	CTRL48-mCit
ctrl5	548	12	baaaa	N+5	0	0	0				12.3333		0	0	0	0	0	0	0	CTRL48-mCit
ctrl5	548	12	baaab	N+5	0	0	0				12.3333		0	0	0	0	0	0	0	CTRL48-mCit
ctrl5	548	12	baaba	N+5	0	0	0				14.6667		0	0	0	0	0	0	0	CTRL48-mCit
ctrl5	548	12	baabb	N+5	0	0	0				14.6667		0	0	0	0	0	0	0	CTRL48-mCit
ctrl5	548	12	babaa	N+5	0	0	0				13		0	0	0	0	0	0	0	CTRL48-mCit
ctrl5	548	12	babab	N+5	0	0	0				13		0	0	0	0	0	0	0	CTRL48-mCit
ctrl5	548	12	babba	N+5	0	0	0				11		0	0	0	0	0	0	0	CTRL48-mCit
ctrl5	548	12	babbb	N+5	0	0	0				11		0	0	0	0	0	0	0	CTRL48-mCit
ctrl5	548	12	bbaaa	N+5	0	0	0				11		0	0	0	0	0	0	0	CTRL48-mCit
ctrl5	548	12	bbaab	N+5	0	0	0				11		0	0	0	0	0	0	0	CTRL48-mCit
ctrl5	548	12	bbaba	N+5	0	0	0				13		0	0	0	0	0	0	0	CTRL48-mCit
ctrl5	548	12	bbabb	N+5	0	0	0				13		0	0	0	0	0	0	0	CTRL48-mCit
ctrl5	548	12	bbbaa	N+5	0	0	0				10.6667		0	0	0	0	0	0	0	CTRL48-mCit
ctrl5	548	12	bbbab	N+5	0	0	0				10.6667		0	0	0	0	0	0	0	CTRL48-mCit
ctrl5	548	12	bbbba	N+5	0	0	0				12.6667		0	0	0	0	0	0	0	CTRL48-mCit
ctrl5	548	12	bbbbb	N+5	0	0	0				12.6667		0	0	0	0	0	0	0	CTRL48-mCit
ctrl5	549	13	o	N	1	0	0				7.66667	40	0	0	0	0	0	0	0	CTRL48-mCit
ctrl5	549	13	a	N+1	1	0	0				26.6667	40	0	0	0	0	0	0	0	CTRL48-mCit
ctrl5	549	13	b	N+1	1	0	0				22.3333	20	0	0	0	0	0	0	0	CTRL48-mCit
ctrl5	549	13	aa	N+2	1	0	0				20	40	0	0	0	0	0	0	0	CTRL48-mCit
ctrl5	549	13	ab	N+2	1	0	0				19.3333	40	0	0	0	0	0	0	0	CTRL48-mCit
ctrl5	549	13	ba	N+2	1	0	0				20.6667	40	0	0	0	0	0	0	0	CTRL48-mCit
ctrl5	549	13	bb	N+2	1	0	0				22.6667	40	0	0	0	0	0	0	0	CTRL48-mCit
ctrl5	549	13	aaa	N+3	1	0	0				22.6667	40	0	0	0	0	0	0	0	CTRL48-mCit
ctrl5	549	13	aab	N+3	0	1	0				23.6667		0	0	0	0	0	0	0	CTRL48-mCit
ctrl5	549	13	aba	N+3	1	0	0				23.3333	20	0	0	0	0	0	0	0	CTRL48-mCit
ctrl5	549	13	abb	N+3	1	0	0				25.3333	20	0	0	0	0	0	0	0	CTRL48-mCit
ctrl5	549	13	baa	N+3	1	0	0				28.3333	40	0	0	0	0	0	0	0	CTRL48-mCit
ctrl5	549	13	bab	N+3	1	0	0				22	40	0	0	0	0	0	0	0	CTRL48-mCit
ctrl5	549	13	bba	N+3	1	0	0				21.3333	20	0	0	0	0	0	0	0	CTRL48-mCit
ctrl5	549	13	bbb	N+3	1	0	0				23.6667	20	0	0	0	0	0	0	0	CTRL48-mCit
ctrl5	549	13	aaaa	N+4	0	0	0				13.3333		0	0	0	0	0	0	0	CTRL48-mCit
ctrl5	549	13	aaab	N+4	0	0	0				13.3333		0	0	0	0	0	0	0	CTRL48-mCit
ctrl5	549	13	abaa	N+4	0	0	0				13.6667		0	0	0	0	0	0	0	CTRL48-mCit
ctrl5	549	13	abab	N+4	0	0	0				13.6667		0	0	0	0	0	0	0	CTRL48-mCit
ctrl5	549	13	abba	N+4	0	0	0				11.6667		0	0	0	0	0	0	0	CTRL48-mCit
ctrl5	549	13	abbb	N+4	0	0	0				11.6667		0	0	0	0	0	0	0	CTRL48-mCit
ctrl5	549	13	baaa	N+4	0	0	0				11.6667		0	0	0	0	0	0	0	CTRL48-mCit
ctrl5	549	13	baab	N+4	0	0	0				11.6667		0	0	0	0	0	0	0	CTRL48-mCit
ctrl5	549	13	baba	N+4	0	0	0				18		0	0	0	0	0	0	0	CTRL48-mCit
ctrl5	549	13	babb	N+4	0	0	0				18		0	0	0	0	0	0	0	CTRL48-mCit
ctrl5	549	13	bbaa	N+4	0	0	0				17		0	0	0	0	0	0	0	CTRL48-mCit
ctrl5	549	13	bbab	N+4	0	0	0				17		0	0	0	0	0	0	0	CTRL48-mCit
ctrl5	549	13	bbba	N+4	0	0	0				14.6667		0	0	0	0	0	0	0	CTRL48-mCit
ctrl5	549	13	bbbb	N+4	0	0	0				14.6667		0	0	0	0	0	0	0	CTRL48-mCit
ctrl5	550	14	o	N	1	0	0				6.66667	100	0	0	1	0	1	0	0	CTRL48-mCit
ctrl5	550	14	(a_b)	N+1	0	0	0			o	84.6667		0	1	0	0	0	0	0	CTRL48-mCit
ctrl5	550	14	c	N+1	0	1	0				27.6667		0	0	0	0	0	0	0	CTRL48-mCit
ctrl5	551	15	o	N	0	0	0				93		0	0	0	0	0	0	0	CTRL48-mCit
ctrl5	552	16	o	N	1	0	0				1	20	0	0	0	0	0	0	0	CTRL48-mCit
ctrl5	552	16	a	N+1	1	0	0				19.6667	20	0	0	0	0	0	0	0	CTRL48-mCit
ctrl5	552	16	b	N+1	1	0	0				18	40	0	0	0	0	0	0	0	CTRL48-mCit
ctrl5	552	16	aa	N+2	1	0	0				19.3333	20	0	0	0	0	0	0	0	CTRL48-mCit
ctrl5	552	16	ab	N+2	1	0	0				17.6667	20	0	0	0	0	0	0	0	CTRL48-mCit
ctrl5	552	16	ba	N+2	1	0	0				18.6667	20	0	0	0	0	0	0	0	CTRL48-mCit
ctrl5	552	16	bb	N+2	1	0	0				21.3333	20	0	0	0	0	0	0	0	CTRL48-mCit
ctrl5	552	16	aaa	N+3	1	0	0				17	20	0	0	0	0	0	0	0	CTRL48-mCit
ctrl5	552	16	aab	N+3	1	0	0				19.3333	40	0	0	0	0	0	0	0	CTRL48-mCit
ctrl5	552	16	aba	N+3	0	0	0				20.3333	20	0	0	0	0	0	0	0	CTRL48-mCit
ctrl5	552	16	abb	N+3	1	0	0				23.3333	20	0	0	0	0	0	0	0	CTRL48-mCit
ctrl5	552	16	baa	N+3	1	0	0				22.3333	20	0	0	0	0	0	0	0	CTRL48-mCit
ctrl5	552	16	bab	N+3	1	0	0				20.6667	20	0	0	0	0	0	0	0	CTRL48-mCit
ctrl5	552	16	bba	N+3	1	0	0				21.3333	20	0	0	0	0	0	0	0	CTRL48-mCit
ctrl5	552	16	bbb	N+3	1	0	0				19.3333	20	0	0	0	0	0	0	0	CTRL48-mCit
ctrl5	552	16	aaaa	N+4	1	0	0				21.3333	20	0	0	0	0	0	0	0	CTRL48-mCit
ctrl5	552	16	aaab	N+4	1	0	0				18.3333	40	0	0	0	0	0	0	0	CTRL48-mCit
ctrl5	552	16	aaba	N+4	1	0	0				18	20	0	0	0	0	0	0	0	CTRL48-mCit
ctrl5	552	16	aabb	N+4	1	0	0				19.6667	20	0	0	0	0	0	0	0	CTRL48-mCit
ctrl5	552	16	abaa	N+4	1	0	0				21	20	0	0	0	0	0	0	0	CTRL48-mCit
ctrl5	552	16	abab	N+4	1	0	0				20	20	0	0	0	0	0	0	0	CTRL48-mCit
ctrl5	552	16	abba	N+4	1	0	0				19.6667	40	0	0	0	0	0	0	0	CTRL48-mCit
ctrl5	552	16	abbb	N+4	1	0	0				22.3333	20	0	0	0	0	0	0	0	CTRL48-mCit
ctrl5	552	16	baaa	N+4	1	0	0				22.6667	20	0	0	0	0	0	0	0	CTRL48-mCit
ctrl5	552	16	baab	N+4	1	0	0				20.6667	20	0	0	0	0	0	0	0	CTRL48-mCit
ctrl5	552	16	baba	N+4	1	0	0				18.3333	40	0	0	0	0	0	0	0	CTRL48-mCit
ctrl5	552	16	babb	N+4	1	0	0				21	20	0	0	0	0	0	0	0	CTRL48-mCit
ctrl5	552	16	bbaa	N+4	1	0	0				19	40	0	0	0	0	0	0	0	CTRL48-mCit
ctrl5	552	16	bbab	N+4	1	0	0				25	20	0	0	0	0	0	0	0	CTRL48-mCit
ctrl5	552	16	bbba	N+4	1	0	0				21.3333	20	0	0	0	0	0	0	0	CTRL48-mCit
ctrl5	552	16	bbbb	N+4	1	0	0				17.3333	40	0	0	0	0	0	0	0	CTRL48-mCit
ctrl5	552	16	aaaaa	N+5	0	0	0				13		0	0	0	0	0	0	0	CTRL48-mCit
ctrl5	552	16	aaaab	N+5	0	0	0				13		0	0	0	0	0	0	0	CTRL48-mCit
ctrl5	552	16	aaaba	N+5	0	0	0				16.3333		0	0	0	0	0	0	0	CTRL48-mCit
ctrl5	552	16	aaabb	N+5	0	0	0				16.3333		0	0	0	0	0	0	0	CTRL48-mCit
ctrl5	552	16	aabaa	N+5	0	0	0				14.3333		0	0	0	0	0	0	0	CTRL48-mCit
ctrl5	552	16	aabab	N+5	0	0	0				14.3333		0	0	0	0	0	0	0	CTRL48-mCit
ctrl5	552	16	aabba	N+5	0	0	0				12		0	0	0	0	0	0	0	CTRL48-mCit
ctrl5	552	16	aabbb	N+5	0	0	0				12		0	0	0	0	0	0	0	CTRL48-mCit
ctrl5	552	16	abaaa	N+5	0	0	0				12.3333		0	0	0	0	0	0	0	CTRL48-mCit
ctrl5	552	16	abaab	N+5	0	0	0				12.3333		0	0	0	0	0	0	0	CTRL48-mCit
ctrl5	552	16	ababa	N+5	0	0	0				13.3333		0	0	0	0	0	0	0	CTRL48-mCit
ctrl5	552	16	ababb	N+5	0	0	0				13.3333		0	0	0	0	0	0	0	CTRL48-mCit
ctrl5	552	16	abbaa	N+5	0	0	0				10.3333		0	0	0	0	0	0	0	CTRL48-mCit
ctrl5	552	16	abbab	N+5	0	0	0				10.3333		0	0	0	0	0	0	0	CTRL48-mCit
ctrl5	552	16	abbba	N+5	0	0	0				8.66667		0	0	0	0	0	0	0	CTRL48-mCit
ctrl5	552	16	abbbb	N+5	0	0	0				8.66667		0	0	0	0	0	0	0	CTRL48-mCit
ctrl5	552	16	baaaa	N+5	0	0	0				9.66667		0	0	0	0	0	0	0	CTRL48-mCit
ctrl5	552	16	baaab	N+5	0	0	0				9.66667		0	0	0	0	0	0	0	CTRL48-mCit
ctrl5	552	16	baaba	N+5	0	0	0				11.6667		0	0	0	0	0	0	0	CTRL48-mCit
ctrl5	552	16	baabb	N+5	0	0	0				11.6667		0	0	0	0	0	0	0	CTRL48-mCit
ctrl5	552	16	babaa	N+5	0	0	0				14		0	0	0	0	0	0	0	CTRL48-mCit
ctrl5	552	16	babab	N+5	0	0	0				14		0	0	0	0	0	0	0	CTRL48-mCit
ctrl5	552	16	babba	N+5	0	0	0				12.3333		0	0	0	0	0	0	0	CTRL48-mCit
ctrl5	552	16	babbb	N+5	0	0	0				12.3333		0	0	0	0	0	0	0	CTRL48-mCit
ctrl5	552	16	bbaaa	N+5	0	0	0				10		0	0	0	0	0	0	0	CTRL48-mCit
ctrl5	552	16	bbaab	N+5	0	0	0				10		0	0	0	0	0	0	0	CTRL48-mCit
ctrl5	552	16	bbaba	N+5	0	0	0				5.66667		0	0	0	0	0	0	0	CTRL48-mCit
ctrl5	552	16	bbabb	N+5	0	0	0				5.66667		0	0	0	0	0	0	0	CTRL48-mCit
ctrl5	552	16	bbbaa	N+5	0	0	0				10		0	0	0	0	0	0	0	CTRL48-mCit
ctrl5	552	16	bbbab	N+5	0	0	0				10		0	0	0	0	0	0	0	CTRL48-mCit
ctrl5	552	16	bbbba	N+5	0	0	0				14.3333		0	0	0	0	0	0	0	CTRL48-mCit
ctrl5	552	16	bbbbb	N+5	0	0	0				14.3333		0	0	0	0	0	0	0	CTRL48-mCit
ctrl5	553	17	o	N	1	0	0				12.3333	40	0	0	0	0	0	0	0	CTRL48-mCit
ctrl5	553	17	a	N+1	1	0	0				24.3333	40	0	0	0	0	0	0	0	CTRL48-mCit
ctrl5	553	17	b	N+1	1	0	0				29.3333	40	0	0	0	0	0	0	0	CTRL48-mCit
ctrl5	553	17	aa	N+2	1	0	0				18.6667	20	0	0	0	0	0	0	0	CTRL48-mCit
ctrl5	553	17	ab	N+2	1	0	0				20	20	0	0	0	0	0	0	0	CTRL48-mCit
ctrl5	553	17	ba	N+2	1	0	0				18	20	0	0	0	0	0	0	0	CTRL48-mCit
ctrl5	553	17	bb	N+2	1	0	0				17.3333	20	0	0	0	0	0	0	0	CTRL48-mCit
ctrl5	553	17	aaa	N+3	1	0	0				19	20	0	0	0	0	0	0	0	CTRL48-mCit
ctrl5	553	17	aab	N+3	1	0	0				20	40	0	0	0	0	0	0	0	CTRL48-mCit
ctrl5	553	17	aba	N+3	1	0	0				21	20	0	0	0	0	0	0	0	CTRL48-mCit
ctrl5	553	17	abb	N+3	1	0	0				17.6667	40	0	0	0	0	0	0	0	CTRL48-mCit
ctrl5	553	17	baa	N+3	1	0	0				19	40	0	0	0	0	0	0	0	CTRL48-mCit
ctrl5	553	17	bab	N+3	1	0	0				19.6667	20	0	0	0	0	0	0	0	CTRL48-mCit
ctrl5	553	17	bba	N+3	1	0	0				17.3333	40	0	0	0	0	0	0	0	CTRL48-mCit
ctrl5	553	17	bbb	N+3	1	0	0				16.6667	20	0	0	0	0	0	0	0	CTRL48-mCit
ctrl5	553	17	aaaa	N+4	0	0	0				16.6667		0	0	0	0	0	0	0	CTRL48-mCit
ctrl5	553	17	aaab	N+4	0	0	0				16.6667		0	0	0	0	0	0	0	CTRL48-mCit
ctrl5	553	17	aaba	N+4	0	0	0				15.3333		0	0	0	0	0	0	0	CTRL48-mCit
ctrl5	553	17	aabb	N+4	0	0	0				15.3333		0	0	0	0	0	0	0	CTRL48-mCit
ctrl5	553	17	abaa	N+4	0	0	0				13.3333		0	0	0	0	0	0	0	CTRL48-mCit
ctrl5	553	17	abab	N+4	0	0	0				13.3333		0	0	0	0	0	0	0	CTRL48-mCit
ctrl5	553	17	abba	N+4	0	0	0				16.3333		0	0	0	0	0	0	0	CTRL48-mCit
ctrl5	553	17	abbb	N+4	0	0	0				16.3333		0	0	0	0	0	0	0	CTRL48-mCit
ctrl5	553	17	baaa	N+4	0	0	0				12		0	0	0	0	0	0	0	CTRL48-mCit
ctrl5	553	17	baab	N+4	0	0	0				12		0	0	0	0	0	0	0	CTRL48-mCit
ctrl5	553	17	baba	N+4	0	0	0				11.6667		0	0	0	0	0	0	0	CTRL48-mCit
ctrl5	553	17	babb	N+4	0	0	0				11.6667		0	0	0	0	0	0	0	CTRL48-mCit
ctrl5	553	17	bbaa	N+4	0	0	0				14.3333		0	0	0	0	0	0	0	CTRL48-mCit
ctrl5	553	17	bbab	N+4	0	0	0				14.3333		0	0	0	0	0	0	0	CTRL48-mCit
ctrl5	553	17	bbba	N+4	0	0	0				15.3333		0	0	0	0	0	0	0	CTRL48-mCit
ctrl5	553	17	bbbb	N+4	0	0	0				15.3333		0	0	0	0	0	0	0	CTRL48-mCit
ctrl5	554	18	o	N	1	0	0				10.6667	40	0	0	0	0	0	0	0	CTRL48-mCit
ctrl5	554	18	a	N+1	1	0	0				21.6667	40	0	0	0	0	0	0	0	CTRL48-mCit
ctrl5	554	18	b	N+1	1	0	0				18	20	0	0	0	0	0	0	0	CTRL48-mCit
ctrl5	554	18	aa	N+2	1	0	0				24	20	0	0	0	0	0	0	0	CTRL48-mCit
ctrl5	554	18	ab	N+2	1	0	0				23	20	0	0	0	0	0	0	0	CTRL48-mCit
ctrl5	554	18	ba	N+2	1	0	0				30	20	0	0	0	0	0	0	0	CTRL48-mCit
ctrl5	554	18	bb	N+2	1	0	0				20.6667	40	0	0	0	0	0	0	0	CTRL48-mCit
ctrl5	554	18	aaa	N+3	1	0	0				21.6667	40	0	0	0	0	0	0	0	CTRL48-mCit
ctrl5	554	18	aab	N+3	1	0	0				27	40	0	0	0	0	0	0	0	CTRL48-mCit
ctrl5	554	18	aba	N+3	1	0	0				21	40	0	0	0	0	0	0	0	CTRL48-mCit
ctrl5	554	18	abb	N+3	1	0	0				22.3333	20	0	0	0	0	0	0	0	CTRL48-mCit
ctrl5	554	18	baa	N+3	1	0	0				16	40	0	0	0	0	0	0	0	CTRL48-mCit
ctrl5	554	18	bab	N+3	1	0	0				14.3333	40	0	0	0	0	0	0	0	CTRL48-mCit
ctrl5	554	18	bba	N+3	1	0	0				17.6667	40	0	0	0	0	0	0	0	CTRL48-mCit
ctrl5	554	18	bbb	N+3	1	0	0				18.6667	40	0	0	0	0	0	0	0	CTRL48-mCit
ctrl5	554	18	aaaa	N+4	0	0	0				12.6667		0	0	0	0	0	0	0	CTRL48-mCit
ctrl5	554	18	aaab	N+4	0	0	0				12.6667		0	0	0	0	0	0	0	CTRL48-mCit
ctrl5	554	18	aaba	N+4	0	0	0				7.33333		0	0	0	0	0	0	0	CTRL48-mCit
ctrl5	554	18	aabb	N+4	0	0	0				7.33333		0	0	0	0	0	0	0	CTRL48-mCit
ctrl5	554	18	abaa	N+4	0	0	0				14.3333		0	0	0	0	0	0	0	CTRL48-mCit
ctrl5	554	18	abab	N+4	0	0	0				14.3333		0	0	0	0	0	0	0	CTRL48-mCit
ctrl5	554	18	abba	N+4	0	0	0				13.3333		0	0	0	0	0	0	0	CTRL48-mCit
ctrl5	554	18	abbb	N+4	0	0	0				13.3333		0	0	0	0	0	0	0	CTRL48-mCit
ctrl5	554	18	baaa	N+4	1	0	0				15.6667	20	0	0	0	0	0	0	0	CTRL48-mCit
ctrl5	554	18	baab	N+4	0	0	0				16.3333		0	0	0	0	0	0	0	CTRL48-mCit
ctrl5	554	18	baba	N+4	0	0	0				18		0	0	0	0	0	0	0	CTRL48-mCit
ctrl5	554	18	babb	N+4	1	0	0				16.3333	20	0	0	0	0	0	0	0	CTRL48-mCit
ctrl5	554	18	bbaa	N+4	1	0	0				18.6667	20	0	0	0	0	0	0	0	CTRL48-mCit
ctrl5	554	18	bbab	N+4	0	0	0				23.6667		0	0	0	0	0	0	0	CTRL48-mCit
ctrl5	554	18	bbba	N+4	1	0	0				20	20	0	0	0	0	0	0	0	CTRL48-mCit
ctrl5	554	18	bbbb	N+4	1	0	0				22	40	0	0	0	0	0	0	0	CTRL48-mCit
ctrl5	554	18	baaaa	N+5	0	0	0				1.66667		0	0	0	0	0	0	0	CTRL48-mCit
ctrl5	554	18	baaab	N+5	0	0	0				1.66667		0	0	0	0	0	0	0	CTRL48-mCit
ctrl5	554	18	babba	N+5	0	0	0				2.66667		0	0	0	0	0	0	0	CTRL48-mCit
ctrl5	554	18	babbb	N+5	0	0	0				2.66667		0	0	0	0	0	0	0	CTRL48-mCit
ctrl5	554	18	bbaaa	N+5	0	0	0				5.33333		0	0	0	0	0	0	0	CTRL48-mCit
ctrl5	554	18	bbaab	N+5	0	0	0				5.33333		0	0	0	0	0	0	0	CTRL48-mCit
ctrl5	554	18	bbbaa	N+5	0	0	0				3.66667		0	0	0	0	0	0	0	CTRL48-mCit
ctrl5	554	18	bbbab	N+5	0	0	0				3.66667		0	0	0	0	0	0	0	CTRL48-mCit
ctrl5	555	19	o	N	0	1	0				24.3333		0	0	0	0	0	0	0	CTRL48-mCit
ctrl5	556	20	o	N	1	0	0				1.33333	20	0	0	0	0	0	0	0	CTRL48-mCit
ctrl5	556	20	a	N+1	1	0	0				21	20	0	0	0	0	0	0	0	CTRL48-mCit
ctrl5	556	20	b	N+1	1	0	0				19	20	0	0	0	0	0	0	0	CTRL48-mCit
ctrl5	556	20	aa	N+2	1	0	0				21	40	0	0	0	0	0	0	0	CTRL48-mCit
ctrl5	556	20	ab	N+2	1	0	0				25	40	0	0	0	0	0	0	0	CTRL48-mCit
ctrl5	556	20	ba	N+2	1	0	0				22.6667	20	0	0	0	0	0	0	0	CTRL48-mCit
ctrl5	556	20	bb	N+2	1	0	0				19.3333	40	0	0	0	0	0	0	0	CTRL48-mCit
ctrl5	556	20	aaa	N+3	1	0	0				21.6667	20	0	0	0	0	0	0	0	CTRL48-mCit
ctrl5	556	20	aab	N+3	1	0	0				21.3333	40	0	0	0	0	0	0	0	CTRL48-mCit
ctrl5	556	20	aba	N+3	1	0	0				19.6667	20	0	0	0	0	0	0	0	CTRL48-mCit
ctrl5	556	20	abb	N+3	1	0	0				20.3333	20	0	0	0	0	0	0	0	CTRL48-mCit
ctrl5	556	20	baa	N+3	1	0	0				21.6667	20	0	0	0	0	0	0	0	CTRL48-mCit
ctrl5	556	20	bab	N+3	1	0	0				21.3333	40	0	0	0	0	0	0	0	CTRL48-mCit
ctrl5	556	20	bba	N+3	1	0	0				20	20	0	0	0	0	0	0	0	CTRL48-mCit
ctrl5	556	20	bbb	N+3	1	0	0				22	20	0	0	0	0	0	0	0	CTRL48-mCit
ctrl5	556	20	aaaa	N+4	1	0	0				22	20	0	0	0	0	0	0	0	CTRL48-mCit
ctrl5	556	20	aaab	N+4	1	0	0				21.6667	20	0	0	0	0	0	0	0	CTRL48-mCit
ctrl5	556	20	aaba	N+4	0	0	0				22		0	0	0	0	0	0	0	CTRL48-mCit
ctrl5	556	20	aabb	N+4	0	0	0				22		0	0	0	0	0	0	0	CTRL48-mCit
ctrl5	556	20	abaa	N+4	1	0	0				18.3333	40	0	0	0	0	0	0	0	CTRL48-mCit
ctrl5	556	20	abab	N+4	1	0	0				15.3333	20	0	0	0	0	0	0	0	CTRL48-mCit
ctrl5	556	20	abba	N+4	0	0	0				3.66667		0	0	0	0	0	0	0	CTRL48-mCit
ctrl5	556	20	abbb	N+4	0	0	0				3.66667		0	0	0	0	0	0	0	CTRL48-mCit
ctrl5	556	20	baaa	N+4	0	0	0				21		0	0	0	0	0	0	0	CTRL48-mCit
ctrl5	556	20	baab	N+4	0	0	0				9.66667		0	0	0	0	0	0	0	CTRL48-mCit
ctrl5	556	20	baba	N+4	1	0	0				23.6667	20	0	0	0	0	0	0	0	CTRL48-mCit
ctrl5	556	20	babb	N+4	1	0	0				18.6667	20	0	0	0	0	0	0	0	CTRL48-mCit
ctrl5	556	20	bbaa	N+4	1	0	0				21	20	0	0	0	0	0	0	0	CTRL48-mCit
ctrl5	556	20	bbab	N+4	1	0	0				21.6667	20	0	0	0	0	0	0	0	CTRL48-mCit
ctrl5	556	20	bbba	N+4	0	0	0				7.33333		0	0	0	0	0	0	0	CTRL48-mCit
ctrl5	556	20	bbbb	N+4	0	0	0				7.33333		0	0	0	0	0	0	0	CTRL48-mCit
ctrl5	556	20	aaaaa	N+5	0	0	0				4		0	0	0	0	0	0	0	CTRL48-mCit
ctrl5	556	20	aaaab	N+5	0	0	0				4		0	0	0	0	0	0	0	CTRL48-mCit
ctrl5	556	20	aaaba	N+5	0	0	0				5.66667		0	0	0	0	0	0	0	CTRL48-mCit
ctrl5	556	20	aaabb	N+5	0	0	0				5.66667		0	0	0	0	0	0	0	CTRL48-mCit
ctrl5	556	20	abaaa	N+5	0	0	0				6.66667		0	0	0	0	0	0	0	CTRL48-mCit
ctrl5	556	20	abaab	N+5	0	0	0				6.66667		0	0	0	0	0	0	0	CTRL48-mCit
ctrl5	556	20	ababa	N+5	0	0	0				9.33333		0	0	0	0	0	0	0	CTRL48-mCit
ctrl5	556	20	ababb	N+5	0	0	0				9.33333		0	0	0	0	0	0	0	CTRL48-mCit
ctrl5	556	20	babaa	N+5	0	0	0				3		0	0	0	0	0	0	0	CTRL48-mCit
ctrl5	556	20	babab	N+5	0	0	0				3		0	0	0	0	0	0	0	CTRL48-mCit
ctrl5	556	20	babba	N+5	0	0	0				8		0	0	0	0	0	0	0	CTRL48-mCit
ctrl5	556	20	babbb	N+5	0	0	0				8		0	0	0	0	0	0	0	CTRL48-mCit
ctrl5	556	20	bbaaa	N+5	0	0	0				11.6667		0	0	0	0	0	0	0	CTRL48-mCit
ctrl5	556	20	bbaab	N+5	0	0	0				11.6667		0	0	0	0	0	0	0	CTRL48-mCit
ctrl5	556	20	bbaba	N+5	0	0	0				10.3333		0	0	0	0	0	0	0	CTRL48-mCit
ctrl5	556	20	bbabb	N+5	0	0	0				10.3333		0	0	0	0	0	0	0	CTRL48-mCit
ctrl5	557	21	o	N	1	0	0				12	40	0	0	0	0	0	0	0	CTRL48-mCit
ctrl5	557	21	a	N+1	1	0	0				19.6667	40	0	0	0	0	0	0	0	CTRL48-mCit
ctrl5	557	21	b	N+1	1	0	0				18.3333	20	0	0	0	0	0	0	0	CTRL48-mCit
ctrl5	557	21	aa	N+2	1	0	0				22.3333	40	0	0	0	0	0	0	0	CTRL48-mCit
ctrl5	557	21	ab	N+2	1	0	0				22.3333	20	0	0	0	0	0	0	0	CTRL48-mCit
ctrl5	557	21	ba	N+2	1	0	0				22.3333	20	0	0	0	0	0	0	0	CTRL48-mCit
ctrl5	557	21	bb	N+2	1	0	0				24.3333	40	0	0	0	0	0	0	0	CTRL48-mCit
ctrl5	557	21	aaa	N+3	1	0	0				24.3333	40	0	0	0	0	0	0	0	CTRL48-mCit
ctrl5	557	21	aab	N+3	1	0	0				23.6667	20	0	0	0	0	0	0	0	CTRL48-mCit
ctrl5	557	21	aba	N+3	1	0	0				24.6667	40	0	0	0	0	0	0	0	CTRL48-mCit
ctrl5	557	21	abb	N+3	1	0	0				27	40	0	0	0	0	0	0	0	CTRL48-mCit
ctrl5	557	21	baa	N+3	1	0	0				20.3333	20	0	0	0	0	0	0	0	CTRL48-mCit
ctrl5	557	21	bab	N+3	1	0	0				18.3333	20	0	0	0	0	0	0	0	CTRL48-mCit
ctrl5	557	21	bba	N+3	1	0	0				22	20	0	0	0	0	0	0	0	CTRL48-mCit
ctrl5	557	21	bbb	N+3	1	0	0				23.6667	20	0	0	0	0	0	0	0	CTRL48-mCit
ctrl5	557	21	aaaa	N+4	0	0	0				12		0	0	0	0	0	0	0	CTRL48-mCit
ctrl5	557	21	aaab	N+4	0	0	0				12		0	0	0	0	0	0	0	CTRL48-mCit
ctrl5	557	21	aaba	N+4	0	0	0				13		0	0	0	0	0	0	0	CTRL48-mCit
ctrl5	557	21	aabb	N+4	0	0	0				13		0	0	0	0	0	0	0	CTRL48-mCit
ctrl5	557	21	abaa	N+4	0	0	0				12		0	0	0	0	0	0	0	CTRL48-mCit
ctrl5	557	21	abab	N+4	0	0	0				12		0	0	0	0	0	0	0	CTRL48-mCit
ctrl5	557	21	abba	N+4	0	0	0				9.66667		0	0	0	0	0	0	0	CTRL48-mCit
ctrl5	557	21	abbb	N+4	0	0	0				9.66667		0	0	0	0	0	0	0	CTRL48-mCit
ctrl5	557	21	baaa	N+4	0	0	0				18.3333		0	0	0	0	0	0	0	CTRL48-mCit
ctrl5	557	21	baab	N+4	0	0	0				18.3333		0	0	0	0	0	0	0	CTRL48-mCit
ctrl5	557	21	baba	N+4	0	0	0				20.3333		0	0	0	0	0	0	0	CTRL48-mCit
ctrl5	557	21	babb	N+4	0	0	0				20.3333		0	0	0	0	0	0	0	CTRL48-mCit
ctrl5	557	21	bbaa	N+4	0	0	0				14.3333		0	0	0	0	0	0	0	CTRL48-mCit
ctrl5	557	21	bbab	N+4	0	0	0				14.3333		0	0	0	0	0	0	0	CTRL48-mCit
ctrl5	557	21	bbba	N+4	0	0	0				12.6667		0	0	0	0	0	0	0	CTRL48-mCit
ctrl5	557	21	bbbb	N+4	0	0	0				12.6667		0	0	0	0	0	0	0	CTRL48-mCit
ctrl5	558	22	o	N	1	0	0				15.3333	20	0	0	0	0	0	0	0	CTRL48-mCit
ctrl5	558	22	a	N+1	1	0	0				17.6667	20	0	0	0	0	0	0	0	CTRL48-mCit
ctrl5	558	22	b	N+1	1	0	0				20.3333	40	0	0	0	0	0	0	0	CTRL48-mCit
ctrl5	558	22	aa	N+2	1	0	0				23	40	0	0	0	0	0	0	0	CTRL48-mCit
ctrl5	558	22	ab	N+2	1	0	0				26.6667	20	0	0	0	0	0	0	0	CTRL48-mCit
ctrl5	558	22	ba	N+2	1	0	0				20.3333	20	0	0	0	0	0	0	0	CTRL48-mCit
ctrl5	558	22	bb	N+2	1	0	0				24.3333	40	0	0	0	0	0	0	0	CTRL48-mCit
ctrl5	558	22	aaa	N+3	1	0	0				26.6667	40	0	0	0	0	0	0	0	CTRL48-mCit
ctrl5	558	22	aab	N+3	1	0	0				29.6667	40	0	0	0	0	0	0	0	CTRL48-mCit
ctrl5	558	22	aba	N+3	1	0	0				25	20	0	0	0	0	0	0	0	CTRL48-mCit
ctrl5	558	22	abb	N+3	1	0	0				26	20	0	0	0	0	0	0	0	CTRL48-mCit
ctrl5	558	22	baa	N+3	1	0	0				20.6667	40	0	0	0	0	0	0	0	CTRL48-mCit
ctrl5	558	22	bab	N+3	1	0	0				22.3333	40	0	0	0	0	0	0	0	CTRL48-mCit
ctrl5	558	22	bba	N+3	1	0	0				27.6667	20	0	0	0	0	0	0	0	CTRL48-mCit
ctrl5	558	22	bbb	N+3	1	0	0				25	20	0	0	0	0	0	0	0	CTRL48-mCit
ctrl5	558	22	aaaa	N+4	0	0	0				8.33333		0	0	0	0	0	0	0	CTRL48-mCit
ctrl5	558	22	aaab	N+4	0	0	0				8.33333		0	0	0	0	0	0	0	CTRL48-mCit
ctrl5	558	22	aaba	N+4	0	0	0				5.33333		0	0	0	0	0	0	0	CTRL48-mCit
ctrl5	558	22	aabb	N+4	0	0	0				5.33333		0	0	0	0	0	0	0	CTRL48-mCit
ctrl5	558	22	abaa	N+4	0	0	0				7		0	0	0	0	0	0	0	CTRL48-mCit
ctrl5	558	22	abab	N+4	0	0	0				7		0	0	0	0	0	0	0	CTRL48-mCit
ctrl5	558	22	abba	N+4	0	0	0				6		0	0	0	0	0	0	0	CTRL48-mCit
ctrl5	558	22	abbb	N+4	0	0	0				6		0	0	0	0	0	0	0	CTRL48-mCit
ctrl5	558	22	baaa	N+4	0	0	0				14.3333		0	0	0	0	0	0	0	CTRL48-mCit
ctrl5	558	22	baab	N+4	0	0	0				14.3333		0	0	0	0	0	0	0	CTRL48-mCit
ctrl5	558	22	baba	N+4	0	0	0				12.6667		0	0	0	0	0	0	0	CTRL48-mCit
ctrl5	558	22	babb	N+4	0	0	0				12.6667		0	0	0	0	0	0	0	CTRL48-mCit
ctrl5	558	22	bbaa	N+4	0	0	0				3.33333		0	0	0	0	0	0	0	CTRL48-mCit
ctrl5	558	22	bbab	N+4	0	0	0				3.33333		0	0	0	0	0	0	0	CTRL48-mCit
ctrl5	558	22	bbba	N+4	0	0	0				6		0	0	0	0	0	0	0	CTRL48-mCit
ctrl5	558	22	bbbb	N+4	0	0	0				6		0	0	0	0	0	0	0	CTRL48-mCit
ctrl5	559	23	o	N	1	0	0				13	20	0	0	0	0	0	0	0	CTRL48-mCit
ctrl5	559	23	a	N+1	1	0	0				20	20	0	0	0	0	0	0	0	CTRL48-mCit
ctrl5	559	23	b	N+1	1	0	0				23.3333	20	0	0	0	0	0	0	0	CTRL48-mCit
ctrl5	559	23	aa	N+2	1	0	0				23.3333	40	0	0	0	0	0	0	0	CTRL48-mCit
ctrl5	559	23	ab	N+2	1	0	0				23	40	0	0	0	0	0	0	0	CTRL48-mCit
ctrl5	559	23	ba	N+2	1	0	0				28	20	0	0	0	0	0	0	0	CTRL48-mCit
ctrl5	559	23	bb	N+2	1	0	0				31.6667	20	0	0	0	0	0	0	0	CTRL48-mCit
ctrl5	559	23	aaa	N+3	1	0	0				26	20	0	0	0	0	0	0	0	CTRL48-mCit
ctrl5	559	23	aab	N+3	1	0	0				25.3333	20	0	0	0	0	0	0	0	CTRL48-mCit
ctrl5	559	23	aba	N+3	1	0	0				27	20	0	0	0	0	0	0	0	CTRL48-mCit
ctrl5	559	23	abb	N+3	1	0	0				23	40	0	0	0	0	0	0	0	CTRL48-mCit
ctrl5	559	23	baa	N+3	1	0	0				27.6667	20	0	0	0	0	0	0	0	CTRL48-mCit
ctrl5	559	23	bab	N+3	0	0	0				27.6667		0	0	0	0	0	0	0	CTRL48-mCit
ctrl5	559	23	bba	N+3	0	0	0				24		0	0	0	0	0	0	0	CTRL48-mCit
ctrl5	559	23	bbb	N+3	0	0	0				24		0	0	0	0	0	0	0	CTRL48-mCit
ctrl5	559	23	aaaa	N+4	0	0	0				9		0	0	0	0	0	0	0	CTRL48-mCit
ctrl5	559	23	aaab	N+4	0	0	0				9		0	0	0	0	0	0	0	CTRL48-mCit
ctrl5	559	23	aaba	N+4	0	0	0				9.66667		0	0	0	0	0	0	0	CTRL48-mCit
ctrl5	559	23	aabb	N+4	0	0	0				9.66667		0	0	0	0	0	0	0	CTRL48-mCit
ctrl5	559	23	abaa	N+4	0	0	0				8.33333		0	0	0	0	0	0	0	CTRL48-mCit
ctrl5	559	23	abab	N+4	0	0	0				8.33333		0	0	0	0	0	0	0	CTRL48-mCit
ctrl5	559	23	abba	N+4	0	0	0				12		0	0	0	0	0	0	0	CTRL48-mCit
ctrl5	559	23	abbb	N+4	0	0	0				12		0	0	0	0	0	0	0	CTRL48-mCit
ctrl5	559	23	baaa	N+4	0	0	0				0		0	0	0	0	0	0	0	CTRL48-mCit
ctrl5	559	23	baab	N+4	0	0	0				0		0	0	0	0	0	0	0	CTRL48-mCit
ctrl5	560	24	o	N	1	0	0				17.6667	40	0	0	0	0	0	0	0	CTRL48-mCit
ctrl5	560	24	a	N+1	1	0	0				18.3333	40	0	0	0	0	0	0	0	CTRL48-mCit
ctrl5	560	24	b	N+1	1	0	0				23.3333	20	0	0	0	0	0	0	0	CTRL48-mCit
ctrl5	560	24	aa	N+2	1	0	0				20.6667	20	0	0	0	0	0	0	0	CTRL48-mCit
ctrl5	560	24	ab	N+2	1	0	0				17	40	0	0	0	0	0	0	0	CTRL48-mCit
ctrl5	560	24	ba	N+2	1	0	0				21.6667	40	0	0	0	0	0	0	0	CTRL48-mCit
ctrl5	560	24	bb	N+2	1	0	0				19.6667	20	0	0	0	0	0	0	0	CTRL48-mCit
ctrl5	560	24	aaa	N+3	1	0	0				22	20	0	0	0	0	0	0	0	CTRL48-mCit
ctrl5	560	24	aab	N+3	1	0	0				24.6667	20	0	0	0	0	0	0	0	CTRL48-mCit
ctrl5	560	24	aba	N+3	1	0	0				18.6667	20	0	0	0	0	0	0	0	CTRL48-mCit
ctrl5	560	24	abb	N+3	1	0	0				16.6667	20	0	0	0	0	0	0	0	CTRL48-mCit
ctrl5	560	24	baa	N+3	1	0	0				20.6667	40	0	0	0	0	0	0	0	CTRL48-mCit
ctrl5	560	24	bab	N+3	1	0	0				21.6667	20	0	0	0	0	0	0	0	CTRL48-mCit
ctrl5	560	24	bba	N+3	1	0	0				20	20	0	0	0	0	0	0	0	CTRL48-mCit
ctrl5	560	24	bbb	N+3	1	0	0				19.6667	40	0	0	0	0	0	0	0	CTRL48-mCit
ctrl5	560	24	aaaa	N+4	0	0	0				12.3333		0	0	0	0	0	0	0	CTRL48-mCit
ctrl5	560	24	aaab	N+4	0	0	0				12.3333		0	0	0	0	0	0	0	CTRL48-mCit
ctrl5	560	24	aaba	N+4	0	0	0				9.66667		0	0	0	0	0	0	0	CTRL48-mCit
ctrl5	560	24	aabb	N+4	0	0	0				9.66667		0	0	0	0	0	0	0	CTRL48-mCit
ctrl5	560	24	abaa	N+4	0	0	0				19		0	0	0	0	0	0	0	CTRL48-mCit
ctrl5	560	24	abab	N+4	0	0	0				19		0	0	0	0	0	0	0	CTRL48-mCit
ctrl5	560	24	abba	N+4	0	0	0				21		0	0	0	0	0	0	0	CTRL48-mCit
ctrl5	560	24	abbb	N+4	1	0	0				17.3333	40	0	0	0	0	0	0	0	CTRL48-mCit
ctrl5	560	24	baaa	N+4	0	0	0				7.33333		0	0	0	0	0	0	0	CTRL48-mCit
ctrl5	560	24	baab	N+4	0	0	0				7.33333		0	0	0	0	0	0	0	CTRL48-mCit
ctrl5	560	24	baba	N+4	0	0	0				6.66667		0	0	0	0	0	0	0	CTRL48-mCit
ctrl5	560	24	babb	N+4	0	0	0				6.66667		0	0	0	0	0	0	0	CTRL48-mCit
ctrl5	560	24	bbaa	N+4	0	0	0				10.6667		0	0	0	0	0	0	0	CTRL48-mCit
ctrl5	560	24	bbab	N+4	0	0	0				10.6667		0	0	0	0	0	0	0	CTRL48-mCit
ctrl5	560	24	bbba	N+4	0	0	0				10.6667		0	0	0	0	0	0	0	CTRL48-mCit
ctrl5	560	24	bbbb	N+4	0	0	0				10.6667		0	0	0	0	0	0	0	CTRL48-mCit
ctrl5	560	24	abbba	N+5	0	0	0				3		0	0	0	0	0	0	0	CTRL48-mCit
ctrl5	560	24	abbbb	N+5	0	0	0				3		0	0	0	0	0	0	0	CTRL48-mCit
ctrl5	561	25	o	N	1	0	0				16.6667	20	0	0	0	0	0	0	0	CTRL48-mCit
ctrl5	561	25	a	N+1	1	0	0				17.6667	40	0	0	0	0	0	0	0	CTRL48-mCit
ctrl5	561	25	b	N+1	1	0	0				35.6667	40	0	0	0	0	0	0	0	CTRL48-mCit
ctrl5	561	25	aa	N+2	1	0	0				17.3333	40	0	0	0	0	0	0	0	CTRL48-mCit
ctrl5	561	25	ab	N+2	1	0	0				20.3333	40	0	0	0	0	0	0	0	CTRL48-mCit
ctrl5	561	25	ba	N+2	1	0	0				26.3333	40	0	0	0	0	0	0	0	CTRL48-mCit
ctrl5	561	25	bb	N+2	1	0	0				19.3333	20	0	0	0	0	0	0	0	CTRL48-mCit
ctrl5	561	25	aaa	N+3	1	0	0				20.6667	40	0	0	0	0	0	0	0	CTRL48-mCit
ctrl5	561	25	aab	N+3	1	0	0				22.6667	20	0	0	0	0	0	0	0	CTRL48-mCit
ctrl5	561	25	aba	N+3	1	0	0				24.3333	40	0	0	0	0	0	0	0	CTRL48-mCit
ctrl5	561	25	abb	N+3	1	0	0				24.3333	20	0	0	0	0	0	0	0	CTRL48-mCit
ctrl5	561	25	baa	N+3	1	0	0				23.6667	20	0	0	0	0	0	0	0	CTRL48-mCit
ctrl5	561	25	bab	N+3	1	0	0				21	20	0	0	0	0	0	0	0	CTRL48-mCit
ctrl5	561	25	bba	N+3	1	0	0				22.6667	20	0	0	0	0	0	0	0	CTRL48-mCit
ctrl5	561	25	bbb	N+3	1	0	0				23	40	0	0	0	0	0	0	0	CTRL48-mCit
ctrl5	561	25	aaaa	N+4	0	0	0				18.3333		0	0	0	0	0	0	0	CTRL48-mCit
ctrl5	561	25	aaab	N+4	0	0	0				18.3333		0	0	0	0	0	0	0	CTRL48-mCit
ctrl5	561	25	aaba	N+4	0	0	0				16.6667		0	0	0	0	0	0	0	CTRL48-mCit
ctrl5	561	25	aabb	N+4	0	0	0				16.6667		0	0	0	0	0	0	0	CTRL48-mCit
ctrl5	561	25	abaa	N+4	0	0	0				11.6667		0	0	0	0	0	0	0	CTRL48-mCit
ctrl5	561	25	abab	N+4	0	0	0				11.6667		0	0	0	0	0	0	0	CTRL48-mCit
ctrl5	561	25	abba	N+4	0	0	0				12		0	0	0	0	0	0	0	CTRL48-mCit
ctrl5	561	25	abbb	N+4	0	0	0				12		0	0	0	0	0	0	0	CTRL48-mCit
ctrl5	561	25	baaa	N+4	0	0	0				6		0	0	0	0	0	0	0	CTRL48-mCit
ctrl5	561	25	baab	N+4	0	0	0				6		0	0	0	0	0	0	0	CTRL48-mCit
ctrl5	561	25	baba	N+4	0	0	0				8.66667		0	0	0	0	0	0	0	CTRL48-mCit
ctrl5	561	25	babb	N+4	0	0	0				8.66667		0	0	0	0	0	0	0	CTRL48-mCit
ctrl5	561	25	bbaa	N+4	0	0	0				14.3333		0	0	0	0	0	0	0	CTRL48-mCit
ctrl5	561	25	bbab	N+4	0	0	0				14.3333		0	0	0	0	0	0	0	CTRL48-mCit
ctrl5	561	25	bbba	N+4	0	0	0				13.6667		0	0	0	0	0	0	0	CTRL48-mCit
ctrl5	561	25	bbbb	N+4	0	0	0				13.6667		0	0	0	0	0	0	0	CTRL48-mCit
ctrl5	562	26	o	N	1	0	0				11.3333	40	0	0	0	0	0	0	0	CTRL48-mCit
ctrl5	562	26	a	N+1	1	0	0				30	100	0	0	1	0	1	0	0	CTRL48-mCit
ctrl5	562	26	b	N+1	0	0	0				81		0	0	0	0	0	0	0	CTRL48-mCit
ctrl5	562	26	(aa_ab)	N+2	0	1	0			a	26.3333		0	0	0	0	0	0	0	CTRL48-mCit
ctrl5	562	26	ac	N+2	0	1	0				30.6667		0	0	0	0	0	0	0	CTRL48-mCit
ctrl5	563	27	o	N	1	0	0				34	60	0	1	0	0	0	0	0	CTRL48-mCit
ctrl5	563	27	a	N+1	1	0	0				23.6667	140	0	1	0	0	1	0	0	CTRL48-mCit
ctrl5	563	27	b	N+1	0	0	0				58		0	1	0	0	0	0	0	CTRL48-mCit
ctrl5	563	27	(aa_ab)	N+2	0	0	0			a	32		0	0	0	0	0	0	0	CTRL48-mCit
ctrl5	564	28	o	N	1	0	0				0.333333	40	0	0	0	0	0	0	0	CTRL48-mCit
ctrl5	564	28	a	N+1	1	0	0				24.3333	40	0	0	0	0	0	0	0	CTRL48-mCit
ctrl5	564	28	b	N+1	1	0	0				21.3333	20	0	0	0	0	0	0	0	CTRL48-mCit
ctrl5	564	28	aa	N+2	1	0	0				24	40	0	0	0	0	0	0	0	CTRL48-mCit
ctrl5	564	28	ab	N+2	1	0	0				22.3333	40	0	0	0	0	0	0	0	CTRL48-mCit
ctrl5	564	28	ba	N+2	1	0	0				22.6667	40	0	0	0	0	0	0	0	CTRL48-mCit
ctrl5	564	28	bb	N+2	1	0	0				21.3333	40	0	0	0	0	0	0	0	CTRL48-mCit
ctrl5	564	28	aaa	N+3	1	0	0				24.6667	20	0	0	0	0	0	0	0	CTRL48-mCit
ctrl5	564	28	aab	N+3	1	0	0				21.3333	40	0	0	0	0	0	0	0	CTRL48-mCit
ctrl5	564	28	aba	N+3	1	0	0				22	20	0	0	0	0	0	0	0	CTRL48-mCit
ctrl5	564	28	abb	N+3	1	0	0				22	20	0	0	0	0	0	0	0	CTRL48-mCit
ctrl5	564	28	baa	N+3	1	0	0				23.3333	40	0	0	0	0	0	0	0	CTRL48-mCit
ctrl5	564	28	bab	N+3	1	0	0				25	20	0	0	0	0	0	0	0	CTRL48-mCit
ctrl5	564	28	bba	N+3	1	0	0				23.6667	20	0	0	0	0	0	0	0	CTRL48-mCit
ctrl5	564	28	bbb	N+3	1	0	0				23	40	0	0	0	0	0	0	0	CTRL48-mCit
ctrl5	564	28	aaaa	N+4	0	0	0				17.3333		0	0	0	0	0	0	0	CTRL48-mCit
ctrl5	564	28	aaab	N+4	0	0	0				17.3333		0	0	0	0	0	0	0	CTRL48-mCit
ctrl5	564	28	aaba	N+4	0	0	0				20.3333		0	0	0	0	0	0	0	CTRL48-mCit
ctrl5	564	28	aabb	N+4	0	0	0				20.3333		0	0	0	0	0	0	0	CTRL48-mCit
ctrl5	564	28	abaa	N+4	0	0	0				21.6667		0	0	0	0	0	0	0	CTRL48-mCit
ctrl5	564	28	abab	N+4	0	0	0				21.6667		0	0	0	0	0	0	0	CTRL48-mCit
ctrl5	564	28	abba	N+4	1	0	0				21	20	0	0	0	0	0	0	0	CTRL48-mCit
ctrl5	564	28	abbb	N+4	1	0	0				21	40	0	0	0	0	0	0	0	CTRL48-mCit
ctrl5	564	28	baaa	N+4	1	0	0				22.3333	20	0	0	0	0	0	0	0	CTRL48-mCit
ctrl5	564	28	baab	N+4	1	0	0				21.3333	20	0	0	0	0	0	0	0	CTRL48-mCit
ctrl5	564	28	baba	N+4	0	0	0				21.6667		0	0	0	0	0	0	0	CTRL48-mCit
ctrl5	564	28	babb	N+4	0	0	0				21.6667		0	0	0	0	0	0	0	CTRL48-mCit
ctrl5	564	28	bbaa	N+4	1	0	0				23	40	0	0	0	0	0	0	0	CTRL48-mCit
ctrl5	564	28	bbab	N+4	0	0	0				24.3333		0	0	0	0	0	0	0	CTRL48-mCit
ctrl5	564	28	bbba	N+4	1	0	0				20	20	0	0	0	0	0	0	0	CTRL48-mCit
ctrl5	564	28	bbbb	N+4	1	0	0				19	40	0	0	0	0	0	0	0	CTRL48-mCit
ctrl5	564	28	abbaa	N+5	0	0	0				1.66667		0	0	0	0	0	0	0	CTRL48-mCit
ctrl5	564	28	abbab	N+5	0	0	0				1.66667		0	0	0	0	0	0	0	CTRL48-mCit
ctrl5	564	28	baaaa	N+5	0	0	0				1.66667		0	0	0	0	0	0	0	CTRL48-mCit
ctrl5	564	28	baaab	N+5	0	0	0				1.66667		0	0	0	0	0	0	0	CTRL48-mCit
ctrl5	564	28	baaba	N+5	0	0	0				2.66667		0	0	0	0	0	0	0	CTRL48-mCit
ctrl5	564	28	baabb	N+5	0	0	0				2.66667		0	0	0	0	0	0	0	CTRL48-mCit
ctrl5	564	28	bbaaa	N+5	0	0	0				1.33333		0	0	0	0	0	0	0	CTRL48-mCit
ctrl5	564	28	bbaab	N+5	0	0	0				1.33333		0	0	0	0	0	0	0	CTRL48-mCit
ctrl5	564	28	bbbaa	N+5	0	0	0				5.66667		0	0	0	0	0	0	0	CTRL48-mCit
ctrl5	564	28	bbbab	N+5	0	0	0				5.66667		0	0	0	0	0	0	0	CTRL48-mCit
ctrl5	564	28	bbbba	N+5	0	0	0				5.66667		0	0	0	0	0	0	0	CTRL48-mCit
ctrl5	564	28	bbbbb	N+5	0	0	0				5		0	0	0	0	0	0	0	CTRL48-mCit
ctrl5	565	29	o	N	1	0	0				18.6667	40	0	0	0	0	0	0	0	CTRL48-mCit
ctrl5	565	29	a	N+1	1	0	0				21.3333	60	0	0	0	0	0	0	0	CTRL48-mCit
ctrl5	565	29	b	N+1	1	0	0				20	20	0	0	0	0	0	0	0	CTRL48-mCit
ctrl5	565	29	aa	N+2	1	0	0				22.3333	60	0	0	0	0	0	0	0	CTRL48-mCit
ctrl5	565	29	ab	N+2	1	0	0				21.6667	20	0	0	0	0	0	0	0	CTRL48-mCit
ctrl5	565	29	ba	N+2	1	0	0				20.3333	20	0	0	0	0	0	0	0	CTRL48-mCit
ctrl5	565	29	bb	N+2	1	0	0				17	20	0	0	0	0	0	0	0	CTRL48-mCit
ctrl5	565	29	aaa	N+3	1	0	0				18.6667	40	0	0	0	0	0	0	0	CTRL48-mCit
ctrl5	565	29	aab	N+3	1	0	0				21.3333	40	0	0	0	0	0	0	0	CTRL48-mCit
ctrl5	565	29	aba	N+3	1	0	0				21.3333	40	0	0	0	0	0	0	0	CTRL48-mCit
ctrl5	565	29	abb	N+3	1	0	0				21.3333	40	0	0	0	0	0	0	0	CTRL48-mCit
ctrl5	565	29	baa	N+3	1	0	0				23	20	0	0	0	0	0	0	0	CTRL48-mCit
ctrl5	565	29	bab	N+3	1	0	0				25.3333	20	0	0	0	0	0	0	0	CTRL48-mCit
ctrl5	565	29	bba	N+3	1	0	0				21.6667	40	0	0	0	0	0	0	0	CTRL48-mCit
ctrl5	565	29	bbb	N+3	0	0	0				36		0	0	0	0	0	0	0	CTRL48-mCit
ctrl5	565	29	aaaa	N+4	0	0	0				8.66667		0	0	0	0	0	0	0	CTRL48-mCit
ctrl5	565	29	aaab	N+4	0	0	0				8.66667		0	0	0	0	0	0	0	CTRL48-mCit
ctrl5	565	29	aaba	N+4	0	0	0				6		0	0	0	0	0	0	0	CTRL48-mCit
ctrl5	565	29	aabb	N+4	0	0	0				6		0	0	0	0	0	0	0	CTRL48-mCit
ctrl5	565	29	abaa	N+4	0	0	0				7.33333		0	0	0	0	0	0	0	CTRL48-mCit
ctrl5	565	29	abab	N+4	0	0	0				7.33333		0	0	0	0	0	0	0	CTRL48-mCit
ctrl5	565	29	abba	N+4	0	0	0				7.33333		0	0	0	0	0	0	0	CTRL48-mCit
ctrl5	565	29	abbb	N+4	0	0	0				7.33333		0	0	0	0	0	0	0	CTRL48-mCit
ctrl5	565	29	baaa	N+4	0	0	0				9.33333		0	0	0	0	0	0	0	CTRL48-mCit
ctrl5	565	29	baab	N+4	0	0	0				9.33333		0	0	0	0	0	0	0	CTRL48-mCit
ctrl5	565	29	baba	N+4	0	0	0				7		0	0	0	0	0	0	0	CTRL48-mCit
ctrl5	565	29	babb	N+4	0	0	0				7		0	0	0	0	0	0	0	CTRL48-mCit
ctrl5	565	29	bbaa	N+4	0	0	0				13.6667		0	0	0	0	0	0	0	CTRL48-mCit
ctrl5	565	29	bbab	N+4	0	0	0				13.6667		0	0	0	0	0	0	0	CTRL48-mCit
ctrl5	566	30	o	N	1	0	0				19	20	0	0	0	0	0	0	0	CTRL48-mCit
ctrl5	566	30	a	N+1	1	0	0				21	20	0	0	0	0	0	0	0	CTRL48-mCit
ctrl5	566	30	b	N+1	1	0	0				18.3333	40	0	0	0	0	0	0	0	CTRL48-mCit
ctrl5	566	30	aa	N+2	1	0	0				20.6667	40	0	0	0	0	0	0	0	CTRL48-mCit
ctrl5	566	30	ab	N+2	1	0	0				21.3333	20	0	0	0	0	0	0	0	CTRL48-mCit
ctrl5	566	30	ba	N+2	1	0	0				18.6667	40	0	0	0	0	0	0	0	CTRL48-mCit
ctrl5	566	30	bb	N+2	1	0	0				17.6667	40	0	0	0	0	0	0	0	CTRL48-mCit
ctrl5	566	30	aaa	N+3	1	0	0				21	60	0	0	0	0	0	0	0	CTRL48-mCit
ctrl5	566	30	aab	N+3	0	0	1	aba			23.6667		0	0	0	0	0	0	0	CTRL48-mCit
ctrl5	566	30	aba	N+3	0	0	1	aab			23.3333		0	0	0	0	0	0	0	CTRL48-mCit
ctrl5	566	30	(aab^aba)	N+3	1	0	0		aba aab		0	60	0	0	0	0	0	0	0	CTRL48-mCit
ctrl5	566	30	abb	N+3	1	0	0				28.6667	20	0	0	0	0	0	0	0	CTRL48-mCit
ctrl5	566	30	baa	N+3	0	0	0				35.3333		0	0	0	0	0	0	0	CTRL48-mCit
ctrl5	566	30	bab	N+3	1	0	0				22.3333	60	0	0	0	0	0	0	0	CTRL48-mCit
ctrl5	566	30	bba	N+3	0	0	0				36.3333		0	0	0	0	0	0	0	CTRL48-mCit
ctrl5	566	30	bbb	N+3	1	0	0				23	40	0	0	0	0	0	0	0	CTRL48-mCit
ctrl5	566	30	aaaa	N+4	0	0	0				9		0	0	0	0	0	0	0	CTRL48-mCit
ctrl5	566	30	aaab	N+4	0	0	0				9		0	0	0	0	0	0	0	CTRL48-mCit
ctrl5	566	30	(aab^aba)a	N+4	0	0	0				6.33333		0	0	0	0	0	0	0	CTRL48-mCit
ctrl5	566	30	(aab^aba)b	N+4	0	0	0				6.33333		0	0	0	0	0	0	0	CTRL48-mCit
ctrl5	566	30	abba	N+4	0	0	0				1.66667		0	0	0	0	0	0	0	CTRL48-mCit
ctrl5	566	30	abbb	N+4	0	0	0				1.66667		0	0	0	0	0	0	0	CTRL48-mCit
ctrl5	566	30	baba	N+4	0	0	0				12		0	0	0	0	0	0	0	CTRL48-mCit
ctrl5	566	30	babb	N+4	0	0	0				12		0	0	0	0	0	0	0	CTRL48-mCit
ctrl5	566	30	bbba	N+4	0	0	0				12.6667		0	0	0	0	0	0	0	CTRL48-mCit
ctrl5	566	30	bbbb	N+4	0	0	0				12.6667		0	0	0	0	0	0	0	CTRL48-mCit
ctrl5	567	31	o	N	1	0	0				11	40	0	0	0	0	0	0	0	CTRL48-mCit
ctrl5	567	31	a	N+1	1	0	0				19.3333	60	0	0	0	0	0	0	0	CTRL48-mCit
ctrl5	567	31	b	N+1	1	0	0				19	60	0	0	0	0	0	0	0	CTRL48-mCit
ctrl5	567	31	aa	N+2	1	0	0				23	20	0	0	0	0	0	0	0	CTRL48-mCit
ctrl5	567	31	ab	N+2	1	0	0				19.6667	40	0	0	0	0	0	0	0	CTRL48-mCit
ctrl5	567	31	ba	N+2	1	0	0				19.6667	20	0	0	0	0	0	0	0	CTRL48-mCit
ctrl5	567	31	bb	N+2	1	0	0				21	20	0	0	0	0	0	0	0	CTRL48-mCit
ctrl5	567	31	aaa	N+3	1	0	0				22	40	0	0	0	0	0	0	0	CTRL48-mCit
ctrl5	567	31	aab	N+3	1	0	0				22.3333	40	0	0	0	0	0	0	0	CTRL48-mCit
ctrl5	567	31	aba	N+3	1	0	0				19	40	0	0	0	0	0	0	0	CTRL48-mCit
ctrl5	567	31	abb	N+3	1	0	0				19.6667	40	0	0	0	0	0	0	0	CTRL48-mCit
ctrl5	567	31	baa	N+3	1	0	0				25.6667	40	0	0	0	0	0	0	0	CTRL48-mCit
ctrl5	567	31	bab	N+3	1	0	0				20	60	0	0	0	0	0	0	0	CTRL48-mCit
ctrl5	567	31	bba	N+3	1	0	0				24.3333	40	0	0	0	0	0	0	0	CTRL48-mCit
ctrl5	567	31	bbb	N+3	1	0	0				20.6667	40	0	0	0	0	0	0	0	CTRL48-mCit
ctrl5	567	31	aaaa	N+4	0	0	0				15		0	0	0	0	0	0	0	CTRL48-mCit
ctrl5	567	31	aaab	N+4	0	0	0				15		0	0	0	0	0	0	0	CTRL48-mCit
ctrl5	567	31	aaba	N+4	0	0	0				14.6667		0	0	0	0	0	0	0	CTRL48-mCit
ctrl5	567	31	aabb	N+4	0	0	0				14.6667		0	0	0	0	0	0	0	CTRL48-mCit
ctrl5	567	31	abaa	N+4	0	0	0				21		0	0	0	0	0	0	0	CTRL48-mCit
ctrl5	567	31	abab	N+4	0	0	0				21		0	0	0	0	0	0	0	CTRL48-mCit
ctrl5	567	31	abba	N+4	0	0	0				20.3333		0	0	0	0	0	0	0	CTRL48-mCit
ctrl5	567	31	abbb	N+4	0	0	0				20.3333		0	0	0	0	0	0	0	CTRL48-mCit
ctrl5	567	31	baaa	N+4	0	0	0				15		0	0	0	0	0	0	0	CTRL48-mCit
ctrl5	567	31	baab	N+4	0	0	0				15		0	0	0	0	0	0	0	CTRL48-mCit
ctrl5	567	31	baba	N+4	0	0	0				20.3333		0	0	0	0	0	0	0	CTRL48-mCit
ctrl5	567	31	babb	N+4	0	0	0				20.3333		0	0	0	0	0	0	0	CTRL48-mCit
ctrl5	567	31	bbaa	N+4	0	0	0				15		0	0	0	0	0	0	0	CTRL48-mCit
ctrl5	567	31	bbab	N+4	0	0	0				15		0	0	0	0	0	0	0	CTRL48-mCit
ctrl5	567	31	bbba	N+4	0	0	0				18.6667		0	0	0	0	0	0	0	CTRL48-mCit
ctrl5	567	31	bbbb	N+4	0	0	0				18.6667		0	0	0	0	0	0	0	CTRL48-mCit
ctrl5	568	32	o	N	1	0	0				11.6667	20	0	0	0	0	0	0	0	CTRL48-mCit
ctrl5	568	32	a	N+1	1	0	0				18.6667	60	0	0	0	0	0	0	0	CTRL48-mCit
ctrl5	568	32	b	N+1	1	0	0				20.3333	40	0	0	0	0	0	0	0	CTRL48-mCit
ctrl5	568	32	aa	N+2	1	0	0				21.3333	40	0	0	0	0	0	0	0	CTRL48-mCit
ctrl5	568	32	ab	N+2	1	0	0				18	60	0	0	0	0	0	0	0	CTRL48-mCit
ctrl5	568	32	ba	N+2	1	0	0				21.3333	60	0	0	0	0	0	0	0	CTRL48-mCit
ctrl5	568	32	bb	N+2	1	0	0				20.6667	60	0	0	0	0	0	0	0	CTRL48-mCit
ctrl5	568	32	aaa	N+3	0	0	0				39.3333		0	0	0	0	0	0	0	CTRL48-mCit
ctrl5	568	32	aab	N+3	0	0	0				39.3333		0	0	0	0	0	0	0	CTRL48-mCit
ctrl5	568	32	aba	N+3	1	0	0				20.3333	60	0	0	0	0	0	0	0	CTRL48-mCit
ctrl5	568	32	abb	N+3	1	0	0				20.6667	20	0	0	0	0	0	0	0	CTRL48-mCit
ctrl5	568	32	baa	N+3	1	0	0				21.6667	40	0	0	0	0	0	0	0	CTRL48-mCit
ctrl5	568	32	bab	N+3	1	0	0				20.3333	80	0	0	0	0	0	0	0	CTRL48-mCit
ctrl5	568	32	bba	N+3	1	0	0				26	80	0	0	0	0	0	0	0	CTRL48-mCit
ctrl5	568	32	bbb	N+3	0	0	0				38.3333		0	0	0	0	0	0	0	CTRL48-mCit
ctrl5	568	32	abaa	N+4	0	0	0				21		0	0	0	0	0	0	0	CTRL48-mCit
ctrl5	568	32	abab	N+4	0	0	0				21		0	0	0	0	0	0	0	CTRL48-mCit
ctrl5	568	32	abba	N+4	1	0	0				20	40	0	0	0	0	0	0	0	CTRL48-mCit
ctrl5	568	32	abbb	N+4	0	0	0				21.3333		0	0	0	0	0	0	0	CTRL48-mCit
ctrl5	568	32	baaa	N+4	0	0	0				15.3333		0	0	0	0	0	0	0	CTRL48-mCit
ctrl5	568	32	baab	N+4	0	0	0				15.3333		0	0	0	0	0	0	0	CTRL48-mCit
ctrl5	568	32	baba	N+4	0	0	0				16		0	0	0	0	0	0	0	CTRL48-mCit
ctrl5	568	32	babb	N+4	0	0	0				16		0	0	0	0	0	0	0	CTRL48-mCit
ctrl5	568	32	bbaa	N+4	0	0	0				11		0	0	0	0	0	0	0	CTRL48-mCit
ctrl5	568	32	bbab	N+4	0	0	0				11		0	0	0	0	0	0	0	CTRL48-mCit
ctrl5	568	32	abbaa	N+5	0	0	0				1.33333		0	0	0	0	0	0	0	CTRL48-mCit
ctrl5	568	32	abbab	N+5	0	0	0				1.33333		0	0	0	0	0	0	0	CTRL48-mCit
ctrl5	569	33	o	N	1	0	0				11.6667	40	0	0	0	0	0	0	0	CTRL48-mCit
ctrl5	569	33	a	N+1	1	0	0				20.6667	40	0	0	0	0	0	0	0	CTRL48-mCit
ctrl5	569	33	b	N+1	1	0	0				23.3333	40	0	0	0	0	0	0	0	CTRL48-mCit
ctrl5	569	33	aa	N+2	1	0	0				22.6667	20	0	0	0	0	0	0	0	CTRL48-mCit
ctrl5	569	33	ab	N+2	1	0	0				19.6667	60	0	0	0	0	0	0	0	CTRL48-mCit
ctrl5	569	33	ba	N+2	1	0	0				22.6667	40	0	0	0	0	0	0	0	CTRL48-mCit
ctrl5	569	33	bb	N+2	1	0	0				25.6667	20	0	0	0	0	0	0	0	CTRL48-mCit
ctrl5	569	33	aaa	N+3	1	0	0				21.6667	40	0	0	0	0	0	0	0	CTRL48-mCit
ctrl5	569	33	aab	N+3	1	0	0				26	20	0	0	0	0	0	0	0	CTRL48-mCit
ctrl5	569	33	aba	N+3	1	0	0				23.6667	20	0	0	0	0	0	0	0	CTRL48-mCit
ctrl5	569	33	abb	N+3	1	0	0				20.3333	20	0	0	0	0	0	0	0	CTRL48-mCit
ctrl5	569	33	baa	N+3	1	0	0				21.6667	20	0	0	0	0	0	0	0	CTRL48-mCit
ctrl5	569	33	bab	N+3	1	0	0				21	20	0	0	0	0	0	0	0	CTRL48-mCit
ctrl5	569	33	bba	N+3	1	0	0				24	40	0	0	0	0	0	0	0	CTRL48-mCit
ctrl5	569	33	bbb	N+3	1	0	0				30.3333	20	0	0	0	0	0	0	0	CTRL48-mCit
ctrl5	569	33	aaaa	N+4	0	0	0				14		0	0	0	0	0	0	0	CTRL48-mCit
ctrl5	569	33	aaab	N+4	0	0	0				14		0	0	0	0	0	0	0	CTRL48-mCit
ctrl5	569	33	aaba	N+4	0	0	0				10		0	0	0	0	0	0	0	CTRL48-mCit
ctrl5	569	33	aabb	N+4	0	0	0				10		0	0	0	0	0	0	0	CTRL48-mCit
ctrl5	569	33	abaa	N+4	0	0	0				14.6667		0	0	0	0	0	0	0	CTRL48-mCit
ctrl5	569	33	abab	N+4	0	0	0				14.6667		0	0	0	0	0	0	0	CTRL48-mCit
ctrl5	569	33	abba	N+4	0	0	0				18		0	0	0	0	0	0	0	CTRL48-mCit
ctrl5	569	33	abbb	N+4	0	0	0				18		0	0	0	0	0	0	0	CTRL48-mCit
ctrl5	569	33	baaa	N+4	0	0	0				11.3333		0	0	0	0	0	0	0	CTRL48-mCit
ctrl5	569	33	baab	N+4	0	0	0				11.3333		0	0	0	0	0	0	0	CTRL48-mCit
ctrl5	569	33	baba	N+4	0	0	0				12		0	0	0	0	0	0	0	CTRL48-mCit
ctrl5	569	33	babb	N+4	0	0	0				12		0	0	0	0	0	0	0	CTRL48-mCit
ctrl5	569	33	bbaa	N+4	0	0	0				6		0	0	0	0	0	0	0	CTRL48-mCit
ctrl5	569	33	bbab	N+4	0	0	0				6		0	0	0	0	0	0	0	CTRL48-mCit
ctrl5	570	34	o	N	1	0	0				9.66667	40	0	0	0	0	0	0	0	CTRL48-mCit
ctrl5	570	34	a	N+1	1	0	0				22	20	0	0	0	0	0	0	0	CTRL48-mCit
ctrl5	570	34	b	N+1	1	0	0				20	40	0	0	0	0	0	0	0	CTRL48-mCit
ctrl5	570	34	aa	N+2	1	0	0				21.6667	20	0	0	0	0	0	0	0	CTRL48-mCit
ctrl5	570	34	ab	N+2	1	0	0				21.6667	40	0	0	0	0	0	0	0	CTRL48-mCit
ctrl5	570	34	ba	N+2	1	0	0				24.3333	40	0	0	0	0	0	0	0	CTRL48-mCit
ctrl5	570	34	bb	N+2	1	0	0				25.3333	20	0	0	0	0	0	0	0	CTRL48-mCit
ctrl5	570	34	aaa	N+3	1	0	0				24	40	0	0	0	0	0	0	0	CTRL48-mCit
ctrl5	570	34	aab	N+3	1	0	0				23	40	0	0	0	0	0	0	0	CTRL48-mCit
ctrl5	570	34	aba	N+3	1	0	0				19	40	0	0	0	0	0	0	0	CTRL48-mCit
ctrl5	570	34	abb	N+3	1	0	0				21.6667	40	0	0	0	0	0	0	0	CTRL48-mCit
ctrl5	570	34	baa	N+3	1	0	0				25	20	0	0	0	0	0	0	0	CTRL48-mCit
ctrl5	570	34	bab	N+3	1	0	0				22.6667	20	0	0	0	0	0	0	0	CTRL48-mCit
ctrl5	570	34	bba	N+3	1	0	0				20.6667	20	0	0	0	0	0	0	0	CTRL48-mCit
ctrl5	570	34	bbb	N+3	1	0	0				22.6667	20	0	0	0	0	0	0	0	CTRL48-mCit
ctrl5	570	34	aaaa	N+4	0	0	0				13.6667		0	0	0	0	0	0	0	CTRL48-mCit
ctrl5	570	34	aaab	N+4	0	0	0				13.6667		0	0	0	0	0	0	0	CTRL48-mCit
ctrl5	570	34	aaba	N+4	0	0	0				14.6667		0	0	0	0	0	0	0	CTRL48-mCit
ctrl5	570	34	aabb	N+4	0	0	0				14.6667		0	0	0	0	0	0	0	CTRL48-mCit
ctrl5	570	34	abaa	N+4	0	0	0				18.3333		0	0	0	0	0	0	0	CTRL48-mCit
ctrl5	570	34	abab	N+4	0	0	0				18.3333		0	0	0	0	0	0	0	CTRL48-mCit
ctrl5	570	34	abba	N+4	0	0	0				15.6667		0	0	0	0	0	0	0	CTRL48-mCit
ctrl5	570	34	abbb	N+4	0	0	0				15.6667		0	0	0	0	0	0	0	CTRL48-mCit
ctrl5	570	34	baaa	N+4	0	0	0				11.6667		0	0	0	0	0	0	0	CTRL48-mCit
ctrl5	570	34	baab	N+4	0	0	0				11.6667		0	0	0	0	0	0	0	CTRL48-mCit
ctrl5	570	34	baba	N+4	0	0	0				14		0	0	0	0	0	0	0	CTRL48-mCit
ctrl5	570	34	babb	N+4	0	0	0				14		0	0	0	0	0	0	0	CTRL48-mCit
ctrl5	570	34	bbaa	N+4	0	0	0				15.3333		0	0	0	0	0	0	0	CTRL48-mCit
ctrl5	570	34	bbab	N+4	0	0	0				15.3333		0	0	0	0	0	0	0	CTRL48-mCit
ctrl5	570	34	bbba	N+4	0	0	0				13.3333		0	0	0	0	0	0	0	CTRL48-mCit
ctrl5	570	34	bbbb	N+4	0	0	0				13.3333		0	0	0	0	0	0	0	CTRL48-mCit
ctrl5	571	35	o	N	1	0	0				15	20	0	0	0	0	0	0	0	CTRL48-mCit
ctrl5	571	35	a	N+1	1	0	0				22.6667	40	0	0	0	0	0	0	0	CTRL48-mCit
ctrl5	571	35	b	N+1	1	0	0				23.3333	40	0	0	0	0	0	0	0	CTRL48-mCit
ctrl5	571	35	aa	N+2	1	0	0				25.3333	40	0	0	0	0	0	0	0	CTRL48-mCit
ctrl5	571	35	ab	N+2	1	0	0				21.6667	20	0	0	0	0	0	0	0	CTRL48-mCit
ctrl5	571	35	ba	N+2	1	0	0				24.3333	20	0	0	0	0	0	0	0	CTRL48-mCit
ctrl5	571	35	bb	N+2	1	0	0				25.3333	40	0	0	0	0	0	0	0	CTRL48-mCit
ctrl5	571	35	aaa	N+3	1	0	0				20.6667	40	0	0	0	0	0	0	0	CTRL48-mCit
ctrl5	571	35	aab	N+3	1	0	0				19	40	0	0	0	0	0	0	0	CTRL48-mCit
ctrl5	571	35	aba	N+3	1	0	0				18.3333	40	0	0	0	0	0	0	0	CTRL48-mCit
ctrl5	571	35	abb	N+3	1	0	0				18.6667	40	0	0	0	0	0	0	0	CTRL48-mCit
ctrl5	571	35	baa	N+3	1	0	0				22.3333	20	0	0	0	0	0	0	0	CTRL48-mCit
ctrl5	571	35	bab	N+3	1	0	0				22.3333	20	0	0	0	0	0	0	0	CTRL48-mCit
ctrl5	571	35	bba	N+3	1	0	0				20	40	0	0	0	0	0	0	0	CTRL48-mCit
ctrl5	571	35	bbb	N+3	1	0	0				18.6667	40	0	0	0	0	0	0	0	CTRL48-mCit
ctrl5	571	35	aaaa	N+4	0	0	0				7		0	0	0	0	0	0	0	CTRL48-mCit
ctrl5	571	35	aaab	N+4	0	0	0				7		0	0	0	0	0	0	0	CTRL48-mCit
ctrl5	571	35	aaba	N+4	0	0	0				8.66667		0	0	0	0	0	0	0	CTRL48-mCit
ctrl5	571	35	aabb	N+4	0	0	0				8.66667		0	0	0	0	0	0	0	CTRL48-mCit
ctrl5	571	35	abaa	N+4	0	0	0				13.3333		0	0	0	0	0	0	0	CTRL48-mCit
ctrl5	571	35	abab	N+4	0	0	0				13.3333		0	0	0	0	0	0	0	CTRL48-mCit
ctrl5	571	35	abba	N+4	0	0	0				13		0	0	0	0	0	0	0	CTRL48-mCit
ctrl5	571	35	abbb	N+4	0	0	0				13		0	0	0	0	0	0	0	CTRL48-mCit
ctrl5	571	35	baaa	N+4	0	0	0				6.33333		0	0	0	0	0	0	0	CTRL48-mCit
ctrl5	571	35	baab	N+4	0	0	0				6.33333		0	0	0	0	0	0	0	CTRL48-mCit
ctrl5	571	35	baba	N+4	0	0	0				6.33333		0	0	0	0	0	0	0	CTRL48-mCit
ctrl5	571	35	babb	N+4	0	0	0				6.33333		0	0	0	0	0	0	0	CTRL48-mCit
ctrl5	571	35	bbaa	N+4	0	0	0				7		0	0	0	0	0	0	0	CTRL48-mCit
ctrl5	571	35	bbab	N+4	0	0	0				7		0	0	0	0	0	0	0	CTRL48-mCit
ctrl5	571	35	bbba	N+4	0	0	0				8.33333		0	0	0	0	0	0	0	CTRL48-mCit
ctrl5	571	35	bbbb	N+4	0	0	0				8.33333		0	0	0	0	0	0	0	CTRL48-mCit
ctrl5	572	36	o	N	1	0	0				20.3333	60	0	0	0	0	0	0	0	CTRL48-mCit
ctrl5	572	36	a	N+1	1	0	0				18.6667	40	0	0	0	0	0	0	0	CTRL48-mCit
ctrl5	572	36	b	N+1	1	0	0				19.6667	20	0	0	0	0	0	0	0	CTRL48-mCit
ctrl5	572	36	aa	N+2	1	0	0				23.3333	20	0	0	0	0	0	0	0	CTRL48-mCit
ctrl5	572	36	ab	N+2	1	0	0				19.3333	20	0	0	0	0	0	0	0	CTRL48-mCit
ctrl5	572	36	ba	N+2	1	0	0				22	40	0	0	0	0	0	0	0	CTRL48-mCit
ctrl5	572	36	bb	N+2	1	0	0				24	40	0	0	0	0	0	0	0	CTRL48-mCit
ctrl5	572	36	aaa	N+3	1	0	0				22.3333	40	0	0	0	0	0	0	0	CTRL48-mCit
ctrl5	572	36	aab	N+3	1	0	0				19	40	0	0	0	0	0	0	0	CTRL48-mCit
ctrl5	572	36	aba	N+3	1	0	0				19	40	0	0	0	0	0	0	0	CTRL48-mCit
ctrl5	572	36	abb	N+3	1	0	0				19	20	0	0	0	0	0	0	0	CTRL48-mCit
ctrl5	572	36	baa	N+3	1	0	0				20.3333	40	0	0	0	0	0	0	0	CTRL48-mCit
ctrl5	572	36	bab	N+3	1	0	0				19.6667	40	0	0	0	0	0	0	0	CTRL48-mCit
ctrl5	572	36	bba	N+3	0	0	0				27		0	0	0	0	0	0	0	CTRL48-mCit
ctrl5	572	36	bbb	N+3	0	0	0				27		0	0	0	0	0	0	0	CTRL48-mCit
ctrl5	572	36	aaaa	N+4	0	0	0				5.66667		0	0	0	0	0	0	0	CTRL48-mCit
ctrl5	572	36	aaab	N+4	0	0	0				5.66667		0	0	0	0	0	0	0	CTRL48-mCit
ctrl5	572	36	aaba	N+4	0	0	0				9		0	0	0	0	0	0	0	CTRL48-mCit
ctrl5	572	36	aabb	N+4	0	0	0				9		0	0	0	0	0	0	0	CTRL48-mCit
ctrl5	572	36	abaa	N+4	0	0	0				13		0	0	0	0	0	0	0	CTRL48-mCit
ctrl5	572	36	abab	N+4	0	0	0				13		0	0	0	0	0	0	0	CTRL48-mCit
ctrl5	572	36	abba	N+4	0	0	0				13.3333		0	0	0	0	0	0	0	CTRL48-mCit
ctrl5	572	36	abbb	N+4	0	0	0				13.3333		0	0	0	0	0	0	0	CTRL48-mCit
ctrl5	572	36	baaa	N+4	0	0	0				8		0	0	0	0	0	0	0	CTRL48-mCit
ctrl5	572	36	baab	N+4	0	0	0				8		0	0	0	0	0	0	0	CTRL48-mCit
ctrl5	572	36	baba	N+4	0	0	0				8.66667		0	0	0	0	0	0	0	CTRL48-mCit
ctrl5	572	36	babb	N+4	0	0	0				8.66667		0	0	0	0	0	0	0	CTRL48-mCit
ctrl5	573	37	o	N	1	0	0				17.6667	20	0	0	0	0	0	0	0	CTRL48-mCit
ctrl5	573	37	a	N+1	1	0	0				21	40	0	0	0	0	0	0	0	CTRL48-mCit
ctrl5	573	37	b	N+1	1	0	0				20.6667	20	0	0	0	0	0	0	0	CTRL48-mCit
ctrl5	573	37	aa	N+2	1	0	0				23.6667	40	0	0	0	0	0	0	0	CTRL48-mCit
ctrl5	573	37	ab	N+2	1	0	0				21.3333	80	0	0	0	0	0	0	0	CTRL48-mCit
ctrl5	573	37	ba	N+2	1	0	0				23	20	0	0	0	0	0	0	0	CTRL48-mCit
ctrl5	573	37	bb	N+2	1	0	0				24.6667	40	0	0	0	0	0	0	0	CTRL48-mCit
ctrl5	573	37	aaa	N+3	1	0	0				21.3333	40	0	0	0	0	0	0	0	CTRL48-mCit
ctrl5	573	37	aab	N+3	1	0	0				23.6667	20	0	0	0	0	0	0	0	CTRL48-mCit
ctrl5	573	37	aba	N+3	1	0	0				20.3333	40	0	0	0	0	0	0	0	CTRL48-mCit
ctrl5	573	37	abb	N+3	1	0	0				22	40	0	0	0	0	0	0	0	CTRL48-mCit
ctrl5	573	37	baa	N+3	1	0	0				22.3333	40	0	0	0	0	0	0	0	CTRL48-mCit
ctrl5	573	37	bab	N+3	1	0	0				22.6667	20	0	0	0	0	0	0	0	CTRL48-mCit
ctrl5	573	37	bba	N+3	1	0	0				24	40	0	0	0	0	0	0	0	CTRL48-mCit
ctrl5	573	37	bbb	N+3	1	0	0				23.3333	60	0	0	0	0	0	0	0	CTRL48-mCit
ctrl5	573	37	aaaa	N+4	0	0	0				7		0	0	0	0	0	0	0	CTRL48-mCit
ctrl5	573	37	aaab	N+4	0	0	0				7		0	0	0	0	0	0	0	CTRL48-mCit
ctrl5	573	37	aaba	N+4	0	0	0				5		0	0	0	0	0	0	0	CTRL48-mCit
ctrl5	573	37	aabb	N+4	0	0	0				5		0	0	0	0	0	0	0	CTRL48-mCit
ctrl5	573	37	abaa	N+4	0	0	0				9.66667		0	0	0	0	0	0	0	CTRL48-mCit
ctrl5	573	37	abab	N+4	0	0	0				9.66667		0	0	0	0	0	0	0	CTRL48-mCit
ctrl5	573	37	abba	N+4	0	0	0				8		0	0	0	0	0	0	0	CTRL48-mCit
ctrl5	573	37	abbb	N+4	0	0	0				8		0	0	0	0	0	0	0	CTRL48-mCit
ctrl5	573	37	baaa	N+4	0	0	0				7.66667		0	0	0	0	0	0	0	CTRL48-mCit
ctrl5	573	37	baab	N+4	0	0	0				7.66667		0	0	0	0	0	0	0	CTRL48-mCit
ctrl5	573	37	baba	N+4	0	0	0				7.66667		0	0	0	0	0	0	0	CTRL48-mCit
ctrl5	573	37	babb	N+4	0	0	0				7.66667		0	0	0	0	0	0	0	CTRL48-mCit
ctrl5	573	37	bbaa	N+4	0	0	0				4		0	0	0	0	0	0	0	CTRL48-mCit
ctrl5	573	37	bbab	N+4	0	0	0				4		0	0	0	0	0	0	0	CTRL48-mCit
ctrl5	573	37	bbba	N+4	0	0	0				4.33333		0	0	0	0	0	0	0	CTRL48-mCit
ctrl5	573	37	bbbb	N+4	0	0	0				4.33333		0	0	0	0	0	0	0	CTRL48-mCit
ctrl5	574	38	o	N	1	0	0				13.3333	40	0	0	0	0	0	0	0	CTRL48-mCit
ctrl5	574	38	a	N+1	1	0	0				23	40	0	0	0	0	0	0	0	CTRL48-mCit
ctrl5	574	38	b	N+1	1	0	0				21.6667	40	0	0	0	0	0	0	0	CTRL48-mCit
ctrl5	574	38	aa	N+2	1	0	0				22	40	0	0	0	0	0	0	0	CTRL48-mCit
ctrl5	574	38	ab	N+2	1	0	0				22.3333	40	0	0	0	0	0	0	0	CTRL48-mCit
ctrl5	574	38	ba	N+2	1	0	0				24	40	0	0	0	0	0	0	0	CTRL48-mCit
ctrl5	574	38	bb	N+2	1	0	0				21.3333	40	0	0	0	0	0	0	0	CTRL48-mCit
ctrl5	574	38	aaa	N+3	1	0	0				21	40	0	0	0	0	0	0	0	CTRL48-mCit
ctrl5	574	38	aab	N+3	1	0	0				20.6667	40	0	0	0	0	0	0	0	CTRL48-mCit
ctrl5	574	38	aba	N+3	1	0	0				22.6667	20	0	0	0	0	0	0	0	CTRL48-mCit
ctrl5	574	38	abb	N+3	1	0	0				21.3333	40	0	0	0	0	0	0	0	CTRL48-mCit
ctrl5	574	38	baa	N+3	1	0	0				17.6667	40	0	0	0	0	0	0	0	CTRL48-mCit
ctrl5	574	38	bab	N+3	1	0	0				20.3333	100	0	0	0	0	0	0	0	CTRL48-mCit
ctrl5	574	38	bba	N+3	1	0	0				20.6667	840	0	0	0	0	0	1	0	CTRL48-mCit
ctrl5	574	38	bbb	N+3	1	0	0				24.3333	620	0	0	0	0	0	1	0	CTRL48-mCit
ctrl5	574	38	aaaa	N+4	0	0	0				11		0	0	0	0	0	0	0	CTRL48-mCit
ctrl5	574	38	aaab	N+4	0	0	0				11		0	0	0	0	0	0	0	CTRL48-mCit
ctrl5	574	38	aaba	N+4	0	0	0				11.3333		0	0	0	0	0	0	0	CTRL48-mCit
ctrl5	574	38	aabb	N+4	0	0	0				11.3333		0	0	0	0	0	0	0	CTRL48-mCit
ctrl5	574	38	abaa	N+4	0	0	0				9.33333		0	0	0	0	0	0	0	CTRL48-mCit
ctrl5	574	38	abab	N+4	0	0	0				9.33333		0	0	0	0	0	0	0	CTRL48-mCit
ctrl5	574	38	abba	N+4	0	0	0				10.3333		0	0	0	0	0	0	0	CTRL48-mCit
ctrl5	574	38	abbb	N+4	0	0	0				10.3333		0	0	0	0	0	0	0	CTRL48-mCit
ctrl5	574	38	baaa	N+4	0	0	0				13.6667		0	0	0	0	0	0	0	CTRL48-mCit
ctrl5	574	38	baab	N+4	0	0	0				13.6667		0	0	0	0	0	0	0	CTRL48-mCit
ctrl5	574	38	baba	N+4	0	0	0				10		0	0	0	0	0	0	0	CTRL48-mCit
ctrl5	574	38	babb	N+4	0	0	0				10		0	0	0	0	0	0	0	CTRL48-mCit
ctrl5	575	39	o	N	1	0	0				2.33333	20	0	0	0	0	0	0	0	CTRL48-mCit
ctrl5	575	39	a	N+1	1	0	0				16.6667	40	0	0	0	0	0	0	0	CTRL48-mCit
ctrl5	575	39	b	N+1	1	0	0				18.3333	20	0	0	0	0	0	0	0	CTRL48-mCit
ctrl5	575	39	aa	N+2	1	0	0				19.3333	40	0	0	0	0	0	0	0	CTRL48-mCit
ctrl5	575	39	ab	N+2	1	0	0				17.6667	40	0	0	0	0	0	0	0	CTRL48-mCit
ctrl5	575	39	ba	N+2	1	0	0				21	40	0	0	0	0	0	0	0	CTRL48-mCit
ctrl5	575	39	bb	N+2	1	0	0				20	40	0	0	0	0	0	0	0	CTRL48-mCit
ctrl5	575	39	aaa	N+3	1	0	0				16.3333	40	0	0	0	0	0	0	0	CTRL48-mCit
ctrl5	575	39	aab	N+3	1	0	0				19.6667	40	0	0	0	0	0	0	0	CTRL48-mCit
ctrl5	575	39	aba	N+3	1	0	0				16.3333	40	0	0	0	0	0	0	0	CTRL48-mCit
ctrl5	575	39	abb	N+3	1	0	0				19.3333	40	0	0	0	0	0	0	0	CTRL48-mCit
ctrl5	575	39	baa	N+3	1	0	0				19	40	0	0	0	0	0	0	0	CTRL48-mCit
ctrl5	575	39	bab	N+3	1	0	0				17.6667	20	0	0	0	0	0	0	0	CTRL48-mCit
ctrl5	575	39	bba	N+3	1	0	0				18.6667	40	0	0	0	0	0	0	0	CTRL48-mCit
ctrl5	575	39	bbb	N+3	1	0	0				20.6667	40	0	0	0	0	0	0	0	CTRL48-mCit
ctrl5	575	39	aaaa	N+4	1	0	0				16.3333	1180	0	0	0	0	0	1	0	CTRL48-mCit
ctrl5	575	39	aaab	N+4	1	0	0				16	100	0	0	0	0	0	0	0	CTRL48-mCit
ctrl5	575	39	aaba	N+4	1	0	0				20.3333	40	0	0	0	0	0	0	0	CTRL48-mCit
ctrl5	575	39	aabb	N+4	1	0	0				19.3333	40	0	0	0	0	0	0	0	CTRL48-mCit
ctrl5	575	39	abaa	N+4	1	0	0				20.3333	40	0	0	0	0	0	0	0	CTRL48-mCit
ctrl5	575	39	abab	N+4	1	0	0				21.6667	40	0	0	0	0	0	0	0	CTRL48-mCit
ctrl5	575	39	abba	N+4	1	0	0				20.3333	40	0	0	0	0	0	0	0	CTRL48-mCit
ctrl5	575	39	abbb	N+4	1	0	0				21.6667	40	0	0	0	0	0	0	0	CTRL48-mCit
ctrl5	575	39	baaa	N+4	1	0	0				18	40	0	0	0	0	0	0	0	CTRL48-mCit
ctrl5	575	39	baab	N+4	1	0	0				21.3333	40	0	0	0	0	0	0	0	CTRL48-mCit
ctrl5	575	39	baba	N+4	1	0	0				18.6667	40	0	0	0	0	0	0	0	CTRL48-mCit
ctrl5	575	39	babb	N+4	1	0	0				22.3333	40	0	0	0	0	0	0	0	CTRL48-mCit
ctrl5	575	39	bbaa	N+4	0	0	0				9.66667		0	0	0	0	0	0	0	CTRL48-mCit
ctrl5	575	39	bbab	N+4	0	0	0				21		0	0	0	0	0	0	0	CTRL48-mCit
ctrl5	575	39	bbba	N+4	1	0	0				19	40	0	0	0	0	0	0	0	CTRL48-mCit
ctrl5	575	39	bbbb	N+4	1	0	0				18	40	0	0	0	0	0	0	0	CTRL48-mCit
ctrl5	575	39	aaaba	N+5	0	0	0				19.6667		1	0	0	0	0	0	0	CTRL48-mCit
ctrl5	575	39	aaabb	N+5	0	0	0				19.6667		0	0	0	0	0	0	0	CTRL48-mCit
ctrl5	575	39	aabaa	N+5	0	0	0				12.3333		0	0	0	0	0	0	0	CTRL48-mCit
ctrl5	575	39	aabab	N+5	0	0	0				12.3333		0	0	0	0	0	0	0	CTRL48-mCit
ctrl5	575	39	aabba	N+5	0	0	0				13.3333		0	0	0	0	0	0	0	CTRL48-mCit
ctrl5	575	39	aabbb	N+5	0	0	0				13.3333		0	0	0	0	0	0	0	CTRL48-mCit
ctrl5	575	39	abaaa	N+5	0	0	0				17.3333		0	0	0	0	0	0	0	CTRL48-mCit
ctrl5	575	39	abaab	N+5	0	0	0				17.3333		0	0	0	0	0	0	0	CTRL48-mCit
ctrl5	575	39	ababa	N+5	0	0	0				16.6667		0	0	0	0	0	0	0	CTRL48-mCit
ctrl5	575	39	ababb	N+5	0	0	0				16.6667		0	0	0	0	0	0	0	CTRL48-mCit
ctrl5	575	39	abbaa	N+5	0	0	0				14.3333		0	0	0	0	0	0	0	CTRL48-mCit
ctrl5	575	39	abbab	N+5	0	0	0				14.3333		0	0	0	0	0	0	0	CTRL48-mCit
ctrl5	575	39	abbba	N+5	0	0	0				13.6667		0	0	0	0	0	0	0	CTRL48-mCit
ctrl5	575	39	abbbb	N+5	0	0	0				13.6667		0	0	0	0	0	0	0	CTRL48-mCit
ctrl5	575	39	baaaa	N+5	0	0	0				12.3333		0	0	0	0	0	0	0	CTRL48-mCit
ctrl5	575	39	baaab	N+5	0	0	0				12.3333		0	0	0	0	0	0	0	CTRL48-mCit
ctrl5	575	39	baaba	N+5	0	0	0				9.66667		0	0	0	0	0	0	0	CTRL48-mCit
ctrl5	575	39	baabb	N+5	0	0	0				9.66667		0	0	0	0	0	0	0	CTRL48-mCit
ctrl5	575	39	babaa	N+5	0	0	0				13.3333		0	0	0	0	0	0	0	CTRL48-mCit
ctrl5	575	39	babab	N+5	0	0	0				13.3333		0	0	0	0	0	0	0	CTRL48-mCit
ctrl5	575	39	babba	N+5	0	0	0				9		0	0	0	0	0	0	0	CTRL48-mCit
ctrl5	575	39	babbb	N+5	0	0	0				9		0	0	0	0	0	0	0	CTRL48-mCit
ctrl5	575	39	bbbaa	N+5	0	0	0				10		0	0	0	0	0	0	0	CTRL48-mCit
ctrl5	575	39	bbbab	N+5	0	0	0				10		0	0	0	0	0	0	0	CTRL48-mCit
ctrl5	575	39	bbbba	N+5	0	0	0				11		0	0	0	0	0	0	0	CTRL48-mCit
ctrl5	575	39	bbbbb	N+5	0	0	0				11		0	0	0	0	0	0	0	CTRL48-mCit
ctrl5	576	40	o	N	1	0	0				10	20	0	0	0	0	0	0	0	CTRL48-mCit
ctrl5	576	40	a	N+1	1	0	0				18.3333	40	0	0	0	0	0	0	0	CTRL48-mCit
ctrl5	576	40	b	N+1	1	0	0				18.6667	40	0	0	0	0	0	0	0	CTRL48-mCit
ctrl5	576	40	aa	N+2	1	0	0				19	40	0	0	0	0	0	0	0	CTRL48-mCit
ctrl5	576	40	ab	N+2	1	0	0				19.3333	60	0	0	0	0	0	0	0	CTRL48-mCit
ctrl5	576	40	ba	N+2	1	0	0				22	20	0	0	0	0	0	0	0	CTRL48-mCit
ctrl5	576	40	bb	N+2	1	0	0				21.3333	20	0	0	0	0	0	0	0	CTRL48-mCit
ctrl5	576	40	aaa	N+3	1	0	0				19	40	0	0	0	0	0	0	0	CTRL48-mCit
ctrl5	576	40	aab	N+3	1	0	0				21.3333	20	0	0	0	0	0	0	0	CTRL48-mCit
ctrl5	576	40	aba	N+3	1	0	0				21	40	0	0	0	0	0	0	0	CTRL48-mCit
ctrl5	576	40	abb	N+3	1	0	0				23.3333	60	0	0	0	0	0	0	0	CTRL48-mCit
ctrl5	576	40	baa	N+3	0	0	0				16		0	0	0	0	0	0	0	CTRL48-mCit
ctrl5	576	40	bab	N+3	0	0	0				22.6667		0	0	0	0	0	0	0	CTRL48-mCit
ctrl5	576	40	bba	N+3	1	0	0				23.3333	20	0	0	0	0	0	0	0	CTRL48-mCit
ctrl5	576	40	bbb	N+3	1	0	0				19.3333	40	0	0	0	0	0	0	0	CTRL48-mCit
ctrl5	576	40	aaaa	N+4	1	0	0				23.6667	20	0	0	0	0	0	0	0	CTRL48-mCit
ctrl5	576	40	aaab	N+4	1	0	0				22	20	0	0	0	0	0	0	0	CTRL48-mCit
ctrl5	576	40	aaba	N+4	1	0	0				20.3333	20	0	0	0	0	0	0	0	CTRL48-mCit
ctrl5	576	40	aabb	N+4	0	0	0				10.3333		0	0	0	0	0	0	0	CTRL48-mCit
ctrl5	576	40	abaa	N+4	0	0	0				21.6667		0	0	0	0	0	0	0	CTRL48-mCit
ctrl5	576	40	abab	N+4	1	0	0				19.6667	20	0	0	0	0	0	0	0	CTRL48-mCit
ctrl5	576	40	abba	N+4	0	0	0				19		0	0	0	0	0	0	0	CTRL48-mCit
ctrl5	576	40	abbb	N+4	0	0	0				19		0	0	0	0	0	0	0	CTRL48-mCit
ctrl5	576	40	bbaa	N+4	0	0	0				10.3333		0	0	0	0	0	0	0	CTRL48-mCit
ctrl5	576	40	bbab	N+4	0	0	0				11.3333		0	0	0	0	0	0	0	CTRL48-mCit
ctrl5	576	40	bbba	N+4	0	0	0				17.6667		0	0	0	0	0	0	0	CTRL48-mCit
ctrl5	576	40	bbbb	N+4	1	0	0				19	40	0	0	0	0	0	0	0	CTRL48-mCit
ctrl5	576	40	aaaaa	N+5	0	0	0				1.66667		0	0	0	0	0	0	0	CTRL48-mCit
ctrl5	576	40	aaaab	N+5	0	0	0				1.66667		0	0	0	0	0	0	0	CTRL48-mCit
ctrl5	576	40	aaaba	N+5	0	0	0				2		0	0	0	0	0	0	0	CTRL48-mCit
ctrl5	576	40	aaabb	N+5	0	0	0				2		0	0	0	0	0	0	0	CTRL48-mCit
ctrl5	576	40	aabaa	N+5	0	0	0				2.33333		0	0	0	0	0	0	0	CTRL48-mCit
ctrl5	576	40	aabab	N+5	0	0	0				2.33333		0	0	0	0	0	0	0	CTRL48-mCit
ctrl5	576	40	ababa	N+5	0	0	0				2.33333		0	0	0	0	0	0	0	CTRL48-mCit
ctrl5	576	40	ababb	N+5	0	0	0				2.33333		0	0	0	0	0	0	0	CTRL48-mCit
ctrl5	577	41	o	N	1	0	0				19.3333	60	0	0	0	0	0	0	0	CTRL48-mCit
ctrl5	577	41	a	N+1	0	0	1	b			36.6667		0	0	0	0	0	0	0	CTRL48-mCit
ctrl5	577	41	b	N+1	0	0	1	a			36.6667		0	0	0	0	0	0	0	CTRL48-mCit
ctrl5	577	41	(a^b)	N+1	0	0	0		a b		36		0	0	0	0	0	0	0	CTRL48-mCit
ctrl5	578	42	o	N	1	0	0				8.33333	40	0	0	0	0	0	0	0	CTRL48-mCit
ctrl5	578	42	a	N+1	1	0	0				19.6667	20	0	0	0	0	0	0	0	CTRL48-mCit
ctrl5	578	42	b	N+1	1	0	0				17.6667	180	0	0	0	1	0	0	0	CTRL48-mCit
ctrl5	578	42	aa	N+2	0	0	0				64		0	0	0	0	0	0	0	CTRL48-mCit
ctrl5	578	42	ab	N+2	0	0	0				64		0	0	0	0	0	0	0	CTRL48-mCit
ctrl5	579	43	o	N	1	0	0				9	40	1	0	0	0	0	0	0	CTRL48-mCit
ctrl5	579	43	a	N+1	1	0	0				18.3333	40	0	0	0	0	0	0	0	CTRL48-mCit
ctrl5	579	43	b	N+1	1	0	0				21.3333	40	0	0	0	0	0	0	0	CTRL48-mCit
ctrl5	579	43	aa	N+2	1	0	0				19.6667	60	0	0	0	0	0	0	0	CTRL48-mCit
ctrl5	579	43	ab	N+2	1	0	0				26.6667	60	0	0	0	0	0	0	0	CTRL48-mCit
ctrl5	579	43	ba	N+2	1	0	0				20.3333	40	0	0	0	0	0	0	0	CTRL48-mCit
ctrl5	579	43	bb	N+2	1	0	0				23	20	0	0	0	0	0	0	0	CTRL48-mCit
ctrl5	579	43	aaa	N+3	1	0	0				19.6667	100	0	0	0	0	0	0	0	CTRL48-mCit
ctrl5	579	43	aab	N+3	1	0	0				24.3333	60	0	0	0	0	0	0	0	CTRL48-mCit
ctrl5	579	43	aba	N+3	0	0	0				36.6667		0	0	0	0	0	0	0	CTRL48-mCit
ctrl5	579	43	abb	N+3	0	0	0				36.6667		0	0	0	0	0	0	0	CTRL48-mCit
ctrl5	579	43	baa	N+3	1	0	0				22.6667	80	0	0	0	0	0	0	0	CTRL48-mCit
ctrl5	579	43	bab	N+3	1	0	0				20.3333	80	0	0	0	0	0	0	0	CTRL48-mCit
ctrl5	579	43	bba	N+3	0	0	0				38		0	0	0	0	0	0	0	CTRL48-mCit
ctrl5	579	43	bbb	N+3	0	0	0				38		0	0	0	0	0	0	0	CTRL48-mCit
ctrl5	579	43	aaaa	N+4	0	0	0				22.3333		0	0	0	0	0	0	0	CTRL48-mCit
ctrl5	579	43	aaab	N+4	0	0	0				22.3333		0	0	0	0	0	0	0	CTRL48-mCit
ctrl5	579	43	aaba	N+4	0	0	0				18.3333		0	0	0	0	0	0	0	CTRL48-mCit
ctrl5	579	43	aabb	N+4	0	0	0				18.3333		0	0	0	0	0	0	0	CTRL48-mCit
ctrl5	579	43	baaa	N+4	0	0	0				16.3333		0	0	0	0	0	0	0	CTRL48-mCit
ctrl5	579	43	baab	N+4	0	0	0				16.3333		0	0	0	0	0	0	0	CTRL48-mCit
ctrl5	579	43	baba	N+4	0	0	0				18.6667		0	0	0	0	0	0	0	CTRL48-mCit
ctrl5	579	43	babb	N+4	0	0	0				18.6667		0	0	0	0	0	0	0	CTRL48-mCit
ctrl5	580	44	o	N	0	0	0				93		0	0	0	0	0	0	0	CTRL48-mCit
ctrl5	581	45	o	N	1	0	0				9.66667	20	0	0	0	0	0	0	0	CTRL48-mCit
ctrl5	581	45	a	N+1	1	0	0				20.3333	40	0	0	0	0	0	0	0	CTRL48-mCit
ctrl5	581	45	b	N+1	1	0	0				20.3333	40	0	0	0	0	0	0	0	CTRL48-mCit
ctrl5	581	45	aa	N+2	1	0	0				20.3333	40	0	0	0	0	0	0	0	CTRL48-mCit
ctrl5	581	45	ab	N+2	1	0	0				20.6667	20	0	0	0	0	0	0	0	CTRL48-mCit
ctrl5	581	45	ba	N+2	1	0	0				21	40	0	0	0	0	0	0	0	CTRL48-mCit
ctrl5	581	45	bb	N+2	1	0	0				24	20	0	0	0	0	0	0	0	CTRL48-mCit
ctrl5	581	45	aaa	N+3	1	0	0				19.3333	20	0	0	0	0	0	0	0	CTRL48-mCit
ctrl5	581	45	aab	N+3	1	0	0				19	40	0	0	0	0	0	0	0	CTRL48-mCit
ctrl5	581	45	aba	N+3	1	0	0				19	20	0	0	0	0	0	0	0	CTRL48-mCit
ctrl5	581	45	abb	N+3	1	0	0				23.3333	40	0	0	0	0	0	0	0	CTRL48-mCit
ctrl5	581	45	baa	N+3	1	0	0				21	20	0	0	0	0	0	0	0	CTRL48-mCit
ctrl5	581	45	bab	N+3	1	0	0				20	40	0	0	0	0	0	0	0	CTRL48-mCit
ctrl5	581	45	bba	N+3	1	0	0				20.6667	20	0	0	0	0	0	0	0	CTRL48-mCit
ctrl5	581	45	bbb	N+3	1	0	0				19.3333	40	0	0	0	0	0	0	0	CTRL48-mCit
ctrl5	581	45	aaaa	N+4	1	0	0				16.6667	60	0	0	0	0	0	0	0	CTRL48-mCit
ctrl5	581	45	aaab	N+4	1	0	0				19.3333	40	0	0	0	0	0	0	0	CTRL48-mCit
ctrl5	581	45	aaba	N+4	1	0	0				18	40	0	0	0	0	0	0	0	CTRL48-mCit
ctrl5	581	45	aabb	N+4	1	0	0				21	20	0	0	0	0	0	0	0	CTRL48-mCit
ctrl5	581	45	abaa	N+4	1	0	0				19.3333	20	0	0	0	0	0	0	0	CTRL48-mCit
ctrl5	581	45	abab	N+4	1	0	0				19.3333	20	0	0	0	0	0	0	0	CTRL48-mCit
ctrl5	581	45	abba	N+4	0	0	0				17		0	0	0	0	0	0	0	CTRL48-mCit
ctrl5	581	45	abbb	N+4	0	0	0				17		0	0	0	0	0	0	0	CTRL48-mCit
ctrl5	581	45	baaa	N+4	0	0	0				3.66667		0	0	0	0	0	0	0	CTRL48-mCit
ctrl5	581	45	baab	N+4	0	0	0				3.66667		0	0	0	0	0	0	0	CTRL48-mCit
ctrl5	581	45	baba	N+4	1	0	0				18.3333	40	0	0	0	0	0	0	0	CTRL48-mCit
ctrl5	581	45	babb	N+4	0	0	0				19.6667		0	0	0	0	0	0	0	CTRL48-mCit
ctrl5	581	45	bbaa	N+4	0	0	0				0.666667		0	0	0	0	0	0	0	CTRL48-mCit
ctrl5	581	45	bbab	N+4	0	0	0				0.666667		0	0	0	0	0	0	0	CTRL48-mCit
ctrl5	581	45	bbba	N+4	0	0	0				17.6667		0	0	0	0	0	0	0	CTRL48-mCit
ctrl5	581	45	bbbb	N+4	1	0	0				16.3333	40	0	0	0	0	0	0	0	CTRL48-mCit
ctrl5	581	45	aaaaa	N+5	0	0	0				4.33333		0	0	0	0	0	0	0	CTRL48-mCit
ctrl5	581	45	aaaab	N+5	0	0	0				4.33333		0	0	0	0	0	0	0	CTRL48-mCit
ctrl5	581	45	aaaba	N+5	0	0	0				2.66667		0	0	0	0	0	0	0	CTRL48-mCit
ctrl5	581	45	aaabb	N+5	0	0	0				2.66667		0	0	0	0	0	0	0	CTRL48-mCit
ctrl5	581	45	aabaa	N+5	0	0	0				3.33333		0	0	0	0	0	0	0	CTRL48-mCit
ctrl5	581	45	aabab	N+5	0	0	0				3.33333		0	0	0	0	0	0	0	CTRL48-mCit
ctrl5	581	45	abaaa	N+5	0	0	0				2		0	0	0	0	0	0	0	CTRL48-mCit
ctrl5	581	45	abaab	N+5	0	0	0				2		0	0	0	0	0	0	0	CTRL48-mCit
ctrl5	581	45	ababa	N+5	0	0	0				2		0	0	0	0	0	0	0	CTRL48-mCit
ctrl5	581	45	ababb	N+5	0	0	0				2		0	0	0	0	0	0	0	CTRL48-mCit
ctrl5	581	45	babaa	N+5	0	0	0				1.33333		0	0	0	0	0	0	0	CTRL48-mCit
ctrl5	581	45	babab	N+5	0	0	0				1.33333		0	0	0	0	0	0	0	CTRL48-mCit
ctrl5	581	45	bbbba	N+5	0	0	0				1.33333		0	0	0	0	0	0	0	CTRL48-mCit
ctrl5	581	45	bbbbb	N+5	0	0	0				1.33333		0	0	0	0	0	0	0	CTRL48-mCit
ctrl5	582	46	o	N	1	0	0				26.3333	460	0	0	0	1	0	0	0	CTRL48-mCit
ctrl5	583	47	o	N	0	1	0				20.3333		0	0	0	0	0	0	0	CTRL48-mCit
ctrl5	584	48	o	N	0	1	0				56		1	0	0	0	0	0	0	CTRL48-mCit
ctrl5	585	49	o	N	1	0	0				4.33333	20	0	0	0	0	0	0	0	CTRL48-mCit
ctrl5	585	49	a	N+1	1	0	0				16.6667	40	0	0	0	0	0	0	0	CTRL48-mCit
ctrl5	585	49	b	N+1	1	0	0				17	40	0	0	0	0	0	0	0	CTRL48-mCit
ctrl5	585	49	aa	N+2	1	0	0				18.3333	40	0	0	0	0	0	0	0	CTRL48-mCit
ctrl5	585	49	ab	N+2	1	0	0				20.6667	40	0	0	0	0	0	0	0	CTRL48-mCit
ctrl5	585	49	ba	N+2	1	0	0				21.6667	40	0	0	0	0	0	0	0	CTRL48-mCit
ctrl5	585	49	bb	N+2	1	0	0				20	40	0	0	0	0	0	0	0	CTRL48-mCit
ctrl5	585	49	aaa	N+3	1	0	0				19.3333	40	0	0	0	0	0	0	0	CTRL48-mCit
ctrl5	585	49	aab	N+3	1	0	0				21.6667	20	0	0	0	0	0	0	0	CTRL48-mCit
ctrl5	585	49	aba	N+3	1	0	0				20.6667	20	0	0	0	0	0	0	0	CTRL48-mCit
ctrl5	585	49	abb	N+3	1	0	0				20.6667	20	0	0	0	0	0	0	0	CTRL48-mCit
ctrl5	585	49	baa	N+3	1	0	0				22	20	0	0	0	0	0	0	0	CTRL48-mCit
ctrl5	585	49	bab	N+3	1	0	0				22.6667	40	0	0	0	0	0	0	0	CTRL48-mCit
ctrl5	585	49	bba	N+3	1	0	0				22	20	0	0	0	0	0	0	0	CTRL48-mCit
ctrl5	585	49	bbb	N+3	1	0	0				18	20	0	0	0	0	0	0	0	CTRL48-mCit
ctrl5	585	49	aaaa	N+4	1	0	0				20.6667	40	0	0	0	0	0	0	0	CTRL48-mCit
ctrl5	585	49	aaab	N+4	1	0	0				24.6667	40	0	0	0	0	0	0	0	CTRL48-mCit
ctrl5	585	49	aaba	N+4	1	0	0				22.6667	40	0	0	0	0	0	0	0	CTRL48-mCit
ctrl5	585	49	aabb	N+4	1	0	0				23.6667	20	0	0	0	0	0	0	0	CTRL48-mCit
ctrl5	585	49	abaa	N+4	1	0	0				20.3333	20	0	0	0	0	0	0	0	CTRL48-mCit
ctrl5	585	49	abab	N+4	1	0	0				21.6667	60	0	0	0	0	0	0	0	CTRL48-mCit
ctrl5	585	49	abba	N+4	1	0	0				23	60	0	0	0	0	0	0	0	CTRL48-mCit
ctrl5	585	49	abbb	N+4	1	0	0				22	60	0	0	0	0	0	0	0	CTRL48-mCit
ctrl5	585	49	baaa	N+4	1	0	0				24.3333	20	0	0	0	0	0	0	0	CTRL48-mCit
ctrl5	585	49	baab	N+4	1	0	0				24.3333	40	0	0	0	0	0	0	0	CTRL48-mCit
ctrl5	585	49	baba	N+4	1	0	0				20.6667	20	0	0	0	0	0	0	0	CTRL48-mCit
ctrl5	585	49	babb	N+4	1	0	0				22	40	0	0	0	0	0	0	0	CTRL48-mCit
ctrl5	585	49	bbaa	N+4	1	0	0				27.3333	20	0	0	0	0	0	0	0	CTRL48-mCit
ctrl5	585	49	bbab	N+4	0	0	0				27.6667		0	0	0	0	0	0	0	CTRL48-mCit
ctrl5	585	49	bbba	N+4	1	0	0				21.3333	20	0	0	0	0	0	0	0	CTRL48-mCit
ctrl5	585	49	bbbb	N+4	1	0	0				21.3333	20	0	0	0	0	0	0	0	CTRL48-mCit
ctrl5	585	49	aaaaa	N+5	0	0	0				11.3333		0	0	0	0	0	0	0	CTRL48-mCit
ctrl5	585	49	aaaab	N+5	0	0	0				11.3333		0	0	0	0	0	0	0	CTRL48-mCit
ctrl5	585	49	aaaba	N+5	0	0	0				7.33333		0	0	0	0	0	0	0	CTRL48-mCit
ctrl5	585	49	aaabb	N+5	0	0	0				7.33333		0	0	0	0	0	0	0	CTRL48-mCit
ctrl5	585	49	aabaa	N+5	0	0	0				7.33333		0	0	0	0	0	0	0	CTRL48-mCit
ctrl5	585	49	aabab	N+5	0	0	0				7.33333		0	0	0	0	0	0	0	CTRL48-mCit
ctrl5	585	49	aabba	N+5	0	0	0				6		0	0	0	0	0	0	0	CTRL48-mCit
ctrl5	585	49	aabbb	N+5	0	0	0				6		0	0	0	0	0	0	0	CTRL48-mCit
ctrl5	585	49	abaaa	N+5	0	0	0				8		0	0	0	0	0	0	0	CTRL48-mCit
ctrl5	585	49	abaab	N+5	0	0	0				8		0	0	0	0	0	0	0	CTRL48-mCit
ctrl5	585	49	ababa	N+5	0	0	0				6		0	0	0	0	0	0	0	CTRL48-mCit
ctrl5	585	49	ababb	N+5	0	0	0				6		0	0	0	0	0	0	0	CTRL48-mCit
ctrl5	585	49	abbaa	N+5	0	0	0				5.33333		0	0	0	0	0	0	0	CTRL48-mCit
ctrl5	585	49	abbab	N+5	0	0	0				5.33333		0	0	0	0	0	0	0	CTRL48-mCit
ctrl5	585	49	abbba	N+5	0	0	0				6.33333		0	0	0	0	0	0	0	CTRL48-mCit
ctrl5	585	49	abbbb	N+5	0	0	0				6.33333		0	0	0	0	0	0	0	CTRL48-mCit
ctrl5	585	49	baaaa	N+5	0	0	0				2.66667		0	0	0	0	0	0	0	CTRL48-mCit
ctrl5	585	49	baaab	N+5	0	0	0				2.66667		0	0	0	0	0	0	0	CTRL48-mCit
ctrl5	585	49	baaba	N+5	0	0	0				1		0	0	0	0	0	0	0	CTRL48-mCit
ctrl5	585	49	baabb	N+5	0	0	0				1		0	0	0	0	0	0	0	CTRL48-mCit
ctrl5	585	49	babaa	N+5	0	0	0				4		0	0	0	0	0	0	0	CTRL48-mCit
ctrl5	585	49	babab	N+5	0	0	0				4		0	0	0	0	0	0	0	CTRL48-mCit
ctrl5	585	49	babba	N+5	0	0	0				3.66667		0	0	0	0	0	0	0	CTRL48-mCit
ctrl5	585	49	babbb	N+5	0	0	0				3.66667		0	0	0	0	0	0	0	CTRL48-mCit
ctrl5	585	49	bbbaa	N+5	0	0	0				10		0	0	0	0	0	0	0	CTRL48-mCit
ctrl5	585	49	bbbab	N+5	0	0	0				10		0	0	0	0	0	0	0	CTRL48-mCit
ctrl5	585	49	bbbba	N+5	0	0	0				10		0	0	0	0	0	0	0	CTRL48-mCit
ctrl5	585	49	bbbbb	N+5	0	0	0				10		0	0	0	0	0	0	0	CTRL48-mCit
ctrl5	586	50	o	N	1	0	0				6.66667	40	0	0	0	0	0	0	0	CTRL48-mCit
ctrl5	586	50	a	N+1	1	0	0				19.6667	40	0	0	0	0	0	0	0	CTRL48-mCit
ctrl5	586	50	b	N+1	1	0	0				19	40	0	0	0	0	0	0	0	CTRL48-mCit
ctrl5	586	50	aa	N+2	0	0	0				8.66667		0	0	0	0	0	0	0	CTRL48-mCit
ctrl5	586	50	ab	N+2	1	0	0				21.3333	40	0	0	0	0	0	0	0	CTRL48-mCit
ctrl5	586	50	ba	N+2	1	0	0				23.3333	20	0	0	0	0	0	0	0	CTRL48-mCit
ctrl5	586	50	bb	N+2	1	0	0				21.3333	20	0	0	0	0	0	0	0	CTRL48-mCit
ctrl5	586	50	aba	N+3	1	0	0				23	20	0	0	0	0	0	0	0	CTRL48-mCit
ctrl5	586	50	abb	N+3	1	0	0				20	40	0	0	0	0	0	0	0	CTRL48-mCit
ctrl5	586	50	baa	N+3	1	0	0				24	20	0	0	0	0	0	0	0	CTRL48-mCit
ctrl5	586	50	bab	N+3	1	0	0				21	20	0	0	0	0	0	0	0	CTRL48-mCit
ctrl5	586	50	bba	N+3	1	0	0				20.6667	20	0	0	0	0	0	0	0	CTRL48-mCit
ctrl5	586	50	bbb	N+3	1	0	0				21	20	0	0	0	0	0	0	0	CTRL48-mCit
ctrl5	586	50	abaa	N+4	0	0	0				20		0	0	0	0	0	0	0	CTRL48-mCit
[truncated: 2,425 more rows]
