# Supplementary material for: Chromosome instability induced by a single defined sister chromatid fusion
Source: Life Sci Alliance. 2020 Oct 26;3(12):e202000911. doi: 10.26508/lsa.202000911 (PMC7652394; doi:10.26508/lsa.202000911)
Supplement: Supplementary file 9 [file LSA-2020-00911_SdataF6.xlsx]

## Sheet: Legend
Source Data for Fig 6A	Matched sister pairs analyzed in Fig 6A. The data is collected from Source Data for Fig 4-6.
Cells	Names in the main text.
Stage	mCitrine expression starts at the beginning of the movie (N+x) or during the course of the movie (1+x).
Lineage_ID	Serial number for whole lineages.
Lineage	Lineage corresponds to Source Data for Fig4-6.
Micronuc	A given cell possesses small mCitrine positive nucleus out side of the main one.
Abnormality	The downstream lineage possesses abnormalities (Less_mitosis, Regress, Fusion, Death, and/or M_arrest)
MN	The downstream lineage possesses a cell that harbors MN.
Less_mitosis	The downstream lineage possesses fewer mitosis than its corersponding sister lineage.
Regress	The downstream lineage posseses a cell that failed to generate two daughter cells after cytokinesis.
Fusion	The downstream lineage posseses a cell that fused with other cell.
Death	The downstream lineage posseses a cell that died during interphase.
M_arrest	The downstream lineage posseses a cell that were arresed in mitosis for longer than 2 hours.
Int_duration	Interphase duration until the first mitosis. The unit is hour.
M_duration	Duraiton of the first mitosis. When a cell does not enter mitosis, this column is blank. The unit is minute.

## Sheet: Source Data for Fig 6A
Cells	Stage	Lineage_ID	Lineage	Micronuc	Abnormality	MN	Less_mitosis	Regress	Fusion	Death	M_arrest	Int_duration	M_duration
C48_sgFUSION11	N+n	262	aba	0	0	0	0	0	0	0	0	19.7	50
C48_sgFUSION11	N+n	262	abb	1	1	0	0	0	0	0	1	20.2	180
C48_sgFUSION11	N+n	285	aaa	0	0	0	0	0	0	0	0	31.3
C48_sgFUSION11	N+n	285	aab	1	0	0	0	0	0	0	0	31.3
C48_mCit	N+n	538	aaaa	0	0	0	0	0	0	0	0	8
C48_mCit	N+n	538	aaab	1	0	0	0	0	0	0	0	8
C48_mCit	N+n	540	aba	1	0	0	0	0	0	0	0	36
C48_mCit	N+n	540	abb	0	0	0	0	0	0	0	0	36
C48_mCit	N+n	594	abba	0	0	0	0	0	0	0	0	16
C48_mCit	N+n	594	abbb	1	0	0	0	0	0	0	0	16
C48_mCit	N+n	600	abba	0	0	0	0	0	0	0	0	13
C48_mCit	N+n	600	abbb	1	0	0	0	0	0	0	0	13
C48_mCit	N+n	601	bbba	0	0	0	0	0	0	0	0	20.3333
C48_mCit	N+n	601	bbbb	1	0	0	0	0	0	0	0	20.3333
C48_mCit	N+n	602	abba	1	0	0	0	0	0	0	0	20	40
C48_mCit	N+n	602	abbb	0	0	0	0	0	0	0	0	21	40
C48_mCit	N+n	606	ba	0	0	0	0	0	0	0	0	62.3333
C48_mCit	N+n	606	bb	1	0	0	0	0	0	0	0	62.3333
SIS2_3_mCit	N+n	620	bba	1	0	0	0	0	0	0	0	22.6	60
SIS2_3_mCit	N+n	620	bbb	0	0	0	0	0	0	0	0	31.2	108
SIS2_3_mCit	N+n	622	a	0	0	0	0	0	0	0	0	22	36
SIS2_3_mCit	N+n	622	b	1	1	0	1	0	0	0	0	73.4
SIS2_3_mCit	N+n	624	aa	1	0	0	0	0	0	0	0	64
SIS2_3_mCit	N+n	624	ab	0	0	0	0	0	0	0	0	64
SIS2_3_mCit	N+n	626	ba	1	0	0	0	0	0	0	0	48
SIS2_3_mCit	N+n	626	bb	0	0	0	0	0	0	0	0	48
SIS2_3_mCit	N+n	631	a	0	0	0	0	0	0	0	0	16.2	36
SIS2_3_mCit	N+n	631	b	1	0	0	0	0	0	0	0	22	60
SIS2_3_mCit	N+n	632	ba	1	0	0	0	0	0	0	0	40.2
SIS2_3_mCit	N+n	632	bb	0	0	0	0	0	0	0	0	40.2
SIS2_3_mCit	N+n	633	aa	1	1	0	1	0	0	0	0	61.8
SIS2_3_mCit	N+n	633	ab	0	0	0	0	0	0	0	0	29.4	60
SIS2_3_mCit	N+n	636	ba	0	1	1	0	0	0	0	0	20.4	48
SIS2_3_mCit	N+n	636	bb	1	1	0	1	0	0	0	0	59.4
SIS2_3_mCit	N+n	636	aba	1	0	0	0	0	0	0	0	32
SIS2_3_mCit	N+n	636	abb	0	0	0	0	0	0	0	0	32
SIS2_3_mCit	N+n	637	aaa	0	0	0	0	0	0	0	0	30.6	72
SIS2_3_mCit	N+n	637	aab	1	0	0	0	0	0	0	0	31	60
SIS2_3_mCit	N+n	638	aa	0	0	0	0	0	0	0	0	58.8	48
SIS2_3_mCit	N+n	638	ab	1	1	0	1	0	0	0	0	68.8
SIS2_3_mCit	N+n	639	aaa	1	0	0	0	0	0	0	0	19
SIS2_3_mCit	N+n	639	aab	0	0	0	0	0	0	0	0	19
SIS2_3_mCit	N+n	640	ba	1	0	0	0	0	0	0	0	58.2
SIS2_3_mCit	N+n	640	bb	0	0	0	0	0	0	0	0	58.2
SIS2_3_mCit	N+n	647	aaa	1	1	0	1	0	0	0	0	33.4
SIS2_3_mCit	N+n	647	aab	0	0	0	0	0	0	0	0	23.8	48
SIS2_3_mCit	N+n	654	a	1	1	0	1	0	0	0	0	87.4
SIS2_3_mCit	N+n	654	b	0	0	0	0	0	0	0	0	24.2	36
SIS2-3_sgFUSION11	N+n	703	ba	1	1	1	0	0	0	0	0	33.2	36
SIS2-3_sgFUSION11	N+n	703	bb	0	1	1	0	0	1	0	0	20
SIS2-3_sgFUSION11	N+n	704	ba	1	1	0	0	0	1	0	0	21.6
SIS2-3_sgFUSION11	N+n	704	bb	0	0	0	0	0	0	0	0	24	60
SIS2-3_sgFUSION11	N+n	717	a	1	1	0	1	0	0	0	0	91.6
SIS2-3_sgFUSION11	N+n	717	b	0	1	0	0	1	1	0	0	0.4
SIS2-3_sgFUSION11	1+n	719	a	1	0	0	0	0	0	0	0	31.8
SIS2-3_sgFUSION11	1+n	719	b	0	0	0	0	0	0	0	0	31.8
SIS2-3_sgFUSION11	1+n	726	a	1	1	0	1	0	0	0	0	53.2
SIS2-3_sgFUSION11	1+n	726	b	0	0	0	0	0	0	0	0	32.4	36
SIS2-3_sgFUSION11	N+n	728	a	0	0	0	0	0	0	0	0	18.4	48
SIS2-3_sgFUSION11	N+n	728	b	1	1	0	1	0	0	0	0	83.4
SIS2-3_sgFUSION11	1+n	732	a	1	1	0	1	0	0	0	0	58.4
SIS2-3_sgFUSION11	1+n	732	b	0	0	0	0	0	0	0	0	23.8	36
SIS2-3_sgFUSION11	N+n	733	baa	1	0	0	0	0	0	0	0	25.2
SIS2-3_sgFUSION11	N+n	733	bab	0	0	0	0	0	0	0	0	25.2
SIS2-3_sgFUSION11	N+n	733	bba	1	0	0	0	0	0	0	0	24.6
SIS2-3_sgFUSION11	N+n	733	bbb	0	0	0	0	0	0	0	0	24.6
SIS2-3_sgFUSION11	1+n	734	a	1	1	1	0	0	0	0	0	24	48
SIS2-3_sgFUSION11	1+n	734	b	0	0	0	0	0	0	0	0	24.8	24
SIS2-3_sgFUSION11	1+n	735	a	1	0	0	0	0	0	0	0	38
SIS2-3_sgFUSION11	1+n	735	b	0	0	0	0	0	0	0	0	38
SIS2-3_sgFUSION11	N+n	738	a	1	1	0	0	0	0	1	0	70.2
SIS2-3_sgFUSION11	N+n	738	b	0	0	0	0	0	0	0	0	27.2	36
SIS2-3_sgFUSION11	N+n	739	ba	1	1	1	0	0	0	0	0	28.2	48
SIS2-3_sgFUSION11	N+n	739	bb	0	1	0	1	0	0	0	0	56.2
SIS2-3_sgFUSION11	1+n	743	a	1	0	0	0	0	0	0	0	16.6
SIS2-3_sgFUSION11	1+n	743	b	0	0	0	0	0	0	0	0	16.6
SIS2-3_sgFUSION11	N+n	744	a	1	1	0	0	0	1	0	0	43.8
SIS2-3_sgFUSION11	N+n	744	b	0	1	0	0	0	1	0	0	43.8
SIS2-3_sgFUSION11	N+n	773	a	1	0	0	0	0	0	0	0	17.8
SIS2-3_sgFUSION11	N+n	773	b	0	0	0	0	0	0	0	0	17.8
SIS2-3_sgFUSION11	1+n	777	a	1	0	0	0	0	0	0	0	24.2
SIS2-3_sgFUSION11	1+n	777	b	0	0	0	0	0	0	0	0	24.2
