# Supplementary material for: Chromosome instability induced by a single defined sister chromatid fusion
Source: Life Sci Alliance. 2020 Oct 26;3(12):e202000911. doi: 10.26508/lsa.202000911 (PMC7652394; doi:10.26508/lsa.202000911)
Supplement: Supplementary file 12 [file LSA-2020-00911_TableS4.xlsx]

## Sheet: Table S4
pMTH	Name	Application	Source
221	LentiCRISPR v2	Cloning of pMTH429	Addgene#52961
236	LentiCRISPR v2-sgSubtel	Human subtelomere targeting	This study
299	Sister Del_S-B	Donar cassette cloning	This study
300	Sister Sac-Nhe	Donar cassette cloning	This study
301	Sister Nhe-Bam	Donar cassette cloning	This study
303	pBS-Sister Del_S-B	Donar cassette cloning	This study
304	pBS-Sister	Donar cassette cloning	This study
325	pBS-cHS4	Donar cassette cloning	A gift from Itaru Imayoshi
337	pBS-Sister Neo	Donar cassette cloning	This study
350	pBS-sister only-neo	Donar cassette cloning	This study
353	pBS-2xcHS4(E-X)	Donar cassette cloning	This study
355	pT2AG3(1k)	Donar cassette cloning	Ohki & Ishikawa, 2004, NAR
359	pBS-cHS4x2-sister(neo)	Donar cassette cloning	This study
368	pBS-cHS4x2-sister(neo)-cHS4x2	Donar cassette cloning, FISH probe template	This study
372	pT2AG3 Xp	Donar cassette cloning	This study
374	pT2AG3 Xp-cHS4x2-sister(neo)-cHS4x2	Donar cassette cloning	This study
384	eSpCas9(1.1)	Cloning of pMTH393	Addgene#71814
396	pT2AG3 Xp-franked sister (NEW)	Donar cassette cloning	This study
393	eSpCas9(1.1)-sgCHRXpYp-subtel2	Cassette integration	This study
397	pXp-franked sister	Cassette integration, Southern probe template	This study
429	LentiCRISPR(1.1)	Cloning of pMTH431 and LentiCRISPR/Cas9(1.1)-sgFUSION constructs	This study
431	LentiCRISPR(1.1)-sgEMPTY	Sister chromatid fusion induction, control	This study
432	LentiCRISPR(1.1)-sgFUSION4	Sister chromatid fusion induction	This study
433	LentiCRISPR(1.1)-sgFUSION6	Sister chromatid fusion induction	This study
475	LentiCRISPR(1.1)-sgFUSION7	Sister chromatid fusion induction	This study
476	LentiCRISPR(1.1)-sgFUSION8	Sister chromatid fusion induction	This study
477	LentiCRISPR(1.1)-sgFUSION9	Sister chromatid fusion induction	This study
478	LentiCRISPR(1.1)-sgFUSION10	Sister chromatid fusion induction	This study
479	LentiCRISPR(1.1)-sgFUSION11	Sister chromatid fusion induction	This study
494	LentiCRISPR(1.1)-sgFUSION12	Sister chromatid fusion induction	This study
495	LentiCRISPR(1.1)-sgFUSION13	Sister chromatid fusion induction	This study
496	LentiCRISPR(1.1)-sgFUSION14	Sister chromatid fusion induction	This study
497	LentiCRISPR(1.1)-sgFUSION15	Sister chromatid fusion induction	This study
498	LentiCRISPR(1.1)-sgFUSION16	Sister chromatid fusion induction	This study
499	LentiCRISPR(1.1)-sgFUSION17	Sister chromatid fusion induction	This study
500	LentiCRISPR(1.1)-sgFUSION18	Sister chromatid fusion induction	This study
501	LentiCRISPR(1.1)-sgFUSION19	Sister chromatid fusion induction	This study
513	LentiCRISPR(1.1)-sgFUSION1	Sister chromatid fusion induction	This study
514	LentiCRISPR(1.1)-sgFUSION2	Sister chromatid fusion induction	This study
515	LentiCRISPR(1.1)-sgFUSION3	Sister chromatid fusion induction	This study
516	LentiCRISPR(1.1)-sgFUSION5	Sister chromatid fusion induction	This study
620	pBS-sister(neo)-polyAinv	Donar cassette cloning	This study
652	pBS-sister(neo)-2xpolyA-SalI	Donar cassette cloning	This study
688	psPAX2	Virus packaging	Addgene#12259
689	pCMV-VSV-G	VIrus packaging	Addgene#8454
721	pBS-sister(neo)-2polyA-1Prom	Donar cassette cloning	This study
727	pBS-cHS4x2-ctrl(neo)-loxP-2polyA-1Prom	Donar cassette cloning, FISH probe template	This study
729	pXp-trunc-ctrl(neo)-mCit	Cassette integration	This study
864	pBS-sister(neo)-AAVS1	Standard for qPCR analysis	This study
Supplementary Table S4. Plasmids used in this study. All plasmids were cloned by using standard molecular cloning technique, except for pMTH299, 300, and 303, which were generated by commercial de novo synthesis. Sequence information for these plasmids are available upon request.
